# Supplementary material for: Identification of Highly Conserved SARS-CoV-2 Antigenic Epitopes with Wide Coverage Using Reverse Vaccinology Approach
Source: MDPI journal article supplement (doi:10.3390/v13050787), 2021-04-28
Supplement: s1 [file s1]

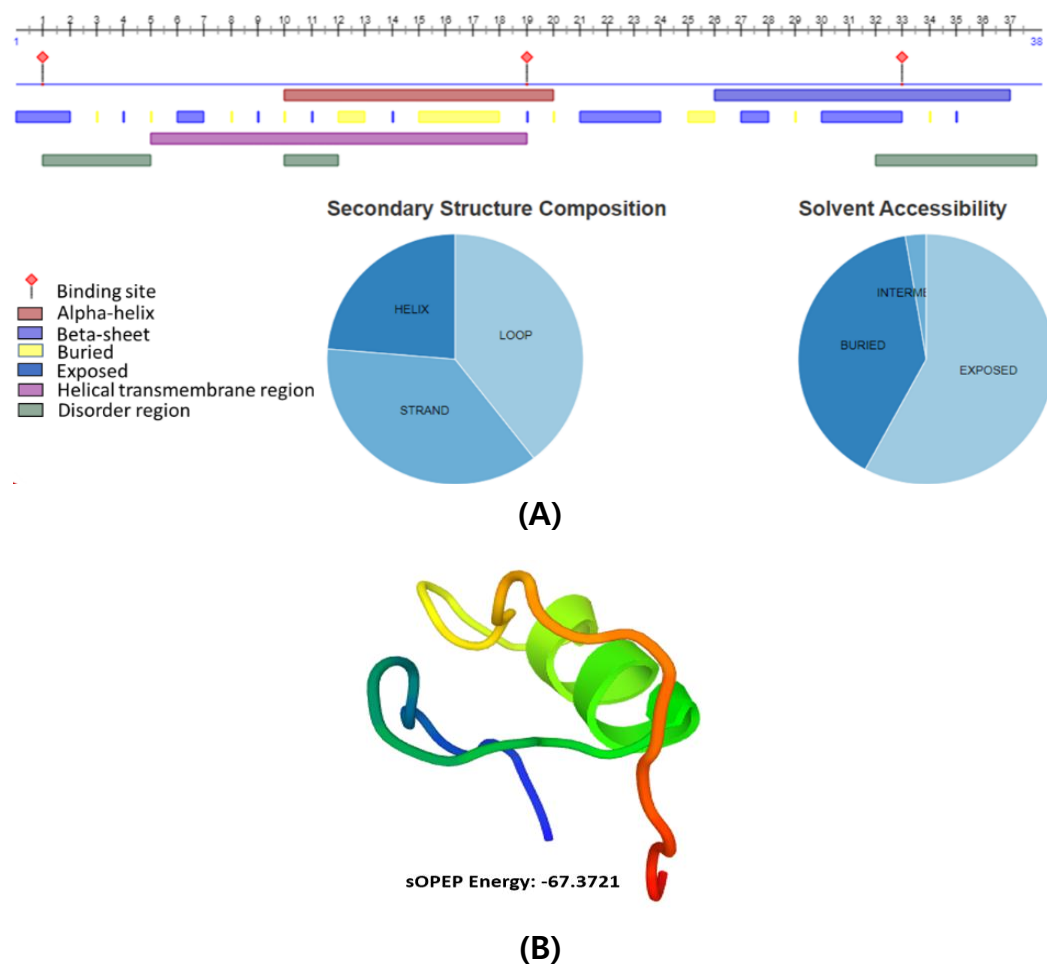

Supplementary Figure.S1 : Analysis of ORF10 protein of SARS-COV-2. A. The secondary structure and features analysis resulted from PredictProtein, and B. The predicted 3D structure resulted by PEP-FOLD3.
