# Supplementary material for: Identification of Highly Conserved SARS-CoV-2 Antigenic Epitopes with Wide Coverage Using Reverse Vaccinology Approach
Source: Viruses. 2021 Apr 28;13(5):787. doi: 10.3390/v13050787 (PMC8145845; doi:10.3390/v13050787)
Supplement: Supplementary file 1 [file viruses-13-00787-s001.zip › Supplementary information_Viruses MDPI/Supplementary Material-Table S1.xlsx]

## Sheet: 1.B-cell
Protein ID	Protein Name	length	N-AntigenPro	N-VaxiJen	Antigenicity Score	Epitope Density
YP_009724393.1	Membrane glycoprotein	222aa	0.244786	0.607381	0.426084	0.0315315
YP_009724397.2	Nucleocapsid phosphoprotein	419aa	0.989448	0.602262	0.795855	0.0310263
YP_009724390.1	Surface glycoprotein (Spike)	1273aa	0.754793	0.553095	0.653944	0.0322074
YP_009725255.1	ORF10 protein	38aa	0.0491316	0.855357	0.452244	0.131579

## Sheet: 2.T-cell
Protein ID	Protein name	length	N-AntigenPro	N-VaxiJen	Antigenicity Score	CD8+Density	Allele coverage	CD4+Density
YP_009724389.1	Plpro / nsp3	1944aa	n.a	0.612143	0.306	0.0658436	1	0.0174897
YP_009724389.1	nsp4	499aa	0.292107	0.558452	0.42528	0.0801603	1	0.0440882
YP_009724389.1	nsp6	289aa	0.0631937	0.692024	0.377609	0.0588235	0.75	0.0622837
YP_009724390.1	Surface glycoprotein	1273aa	0.754793	0.553095	0.653944	0.067557	1	0.0157109
YP_009724391.1	ORF3a protein	275aa	0.423584	0.58869	0.506137	0.0690909	0.916667	0.0363636
YP_009725255.1	ORF10 protein	38aa	0.0491316	0.855357	0.452244	0.131579	0.25	0.0263158

## Sheet: 3.ToxinPred
Peptide Sequence	SVM score	Prediction	Hydrophobicity	Hydropathicity	Hydrophilicity	Charge	Mol wt
RTRSMWSFNPETN	-0.58	Non-Toxin	-0.39	-1.56	0.15	1	1625.95
ITVATSRTLSYYKLGASQRVAGDSGFAA	-1.46	Non-Toxin	-0.08	0.12	-0.21	2	2891.63
NKHIDAYKTFPPTEPKKDKKKKTDEAQPLPQRQKKQPTVTLLPAADM	-0.97	Non-Toxin	-0.37	-1.47	0.7	5.5	5401.97
RGGSQASSRSSSRSRNSSRNSTPGSSRGTSPARMAGNGG	-0.56	Non-Toxin	-0.43	-1.44	0.57	7	3854.55
FHAIHVSGTNG	-0.77	Non-Toxin	0.05	0.1	-0.65	1	1139.4
LVSSQCVNLTTRT	-0.48	Non-Toxin	-0.15	0.25	-0.37	1	1421.82
AQVDVVNFNLT	-1.18	Non-Toxin	0.01	0.57	-0.55	-1	1219.52
TLNDLNETL	-1.12	Non-Toxin	-0.15	-0.44	0.02	-2	1032.25
FSYFAVHFISNSWLM	-1.36	Non-Toxin	0.18	0.89	-1.3	0.5	1849.35
KLIEYTDFA	-0.97	Non-Toxin	-0.05	0	-0.03	-1	1099.37
WLDMVDTSL	-0.73	Non-Toxin	0.04	0.48	-0.43	-2	1079.36
WTAGAAAYY	-1.07	Non-Toxin	0.15	0.29	-1.16	0	973.16
KKRWQLALSKGVHFV	-1.49	Non-Toxin	-0.19	-0.29	-0.07	4.5	1797.41
IAQVDVVF	-0.88	Non-Toxin	0.17	1.7	-0.51	-1	742.97
Peptide Sequence	SVM Score	Prediction	Hydrophobicity	Hydropathicity	Hydrophilicity	Charge	Mol wt
IAQVDVVNFNLT	-1.14	Non-Toxin	0.07	0.9	-0.66	-1	1332.7
KKRWQLALSNGVHFV	-1.4	Non-Toxin	-0.16	-0.27	-0.25	3.5	1783.34
WTAGSAAYY	-0.93	Non-Toxin	0.1	0	-1.07	0	989.16
LVSSQCVNFTTIT	-1.02	Non-Toxin	0.05	0.87	-0.79	0	1412.81
LVSSQCVNFTTRT	-0.65	Non-Toxin	-0.15	0.18	-0.42	1	1455.83
LVSSQCVNLTTIT	-0.91	Non-Toxin	0.04	0.95	-0.74	0	1378.8
ITVATSRMLSYYKLGASQRVAGDSGFAA	-1.59	Non-Toxin	-0.07	0.21	-0.24	2	2921.72

## Sheet: 4.All Mutations
Virus protein		Replacement	Number of sequences	Grantham distance2	Miyata distance3	Notes
S	Surface glycoprotein	D614G	221700	94	2.37
nsp12	RNA-dependent RNA polymerase	P323L	221122	98	2.7	Equivalently P4715L in ORF 1ab
N	Nucleocapsid phosphoprotein	R203K	89402	26	0.4
N	Nucleocapsid phosphoprotein	G204R	88786	125	3.58
ORF 3a		Q57H	51624	24	0.32
S	Surface glycoprotein	A222V	43965	64	1.85
ORF 10		V30L	43701	32	0.91
N	Nucleocapsid phosphoprotein	A220V	43436	64	1.85
nsp2		T85I	35006	89	2.14	Equivalently T265I in ORF 1a
S	Surface glycoprotein	L18F	21086	22	0.63
nsp6	Putative transmembrane domain	L37F	17563	22	0.63	Equivalently L3606F in ORF 1a
nsp2		I120F	15519	21	0.61	Equivalently I300F in ORF 1a
S	Surface glycoprotein	S477N	14859	46	1.31
N	Nucleocapsid phosphoprotein	S194L	12810	144	3.04
ORF 8		S24L	8492	144	3.04
ORF 8		L84S	7578	144	3.04
nsp5	3C-like proteinase	G15S	6785	55	0.85	Equivalently G3278S in ORF 1a
N	Nucleocapsid phosphoprotein	M234I	6579	10	0.29
ORF 3a		G251V	5913	109	2.76
nsp4	Transmembrane domain 2	M324I	4638	10	0.29	Equivalently M3087I in ORF 1a
nsp13	Zinc-binding domain, NTPase/helicase domain	E261D	4635	45	0.9	Equivalently E5585D in ORF 1ab
S	Surface glycoprotein	N439K	4602	94	1.84
nsp12	RNA-dependent RNA polymerase	A185S	4546	99	0.51	Equivalently A4577S in ORF 1ab
nsp5	3C-like proteinase	P108S	4544	73	0.56	Equivalently P3371S in ORF 1a
nsp12	RNA-dependent RNA polymerase	V776L	4528	32	0.91	Equivalently V5168L in ORF 1ab
nsp13	Zinc-binding domain, NTPase/helicase domain	K218R	4495	26	0.4	Equivalently K5542R in ORF 1ab
nsp13	Zinc-binding domain, NTPase/helicase domain	H290Y	4487	83	2.27	Equivalently H5614Y in ORF 1ab
N	Nucleocapsid phosphoprotein	A376T	4477	58	0.9
nsp15	EndoRNAse	T33I	4471	89	2.14	Equivalently T6485I in ORF 1ab
N	Nucleocapsid phosphoprotein	P151L	4346	98	2.7
nsp12	RNA-dependent RNA polymerase	A423V	4245	64	1.85	Equivalently A4815V in ORF 1ab
nsp3	ADRP, Papain-like proteinase, transmembrane domain 1	S543P	4174	73	0.56	Equivalently S1361P in ORF 1a
nsp5	3C-like proteinase	L89F	4112	22	0.63	Equivalently L3352F in ORF 1a
nsp3	ADRP, Papain-like proteinase, transmembrane domain 1	I1683T	4109	89	2.14	Equivalently I2501T in ORF 1a
N	Nucleocapsid phosphoprotein	P199L	3935	98	2.7
ORF 3a		T223I	3933	89	2.14
nsp3	ADRP, Papain-like proteinase, transmembrane domain 1	T428I	3792	89	2.14	Equivalently T1246I in ORF 1a
N	Nucleocapsid phosphoprotein	A398V	3629	64	1.85
nsp14	Exonuclease	M501I	3551	10	0.29	Equivalently M6426I in ORF 1ab
nsp6	Putative transmembrane domain	L142F	3551	22	0.63	Equivalently L3711F in ORF 1a
nsp3	ADRP, Papain-like proteinase, transmembrane domain 1	P968L	3539	98	2.7	Equivalently P1786L in ORF 1a
nsp12	RNA-dependent RNA polymerase	E254D	3506	45	0.9	Equivalently E4646D in ORF 1ab
S	Surface glycoprotein	L5F	3367	22	0.63
nsp13	Zinc-binding domain, NTPase/helicase domain	A598S	3163	99	0.51	Equivalently A5922S in ORF 1ab
nsp12	RNA-dependent RNA polymerase	V720I	3117	30	0.85	Equivalently V5112I in ORF 1ab
nsp9	ssRNA-binding protein	M101I	3110	10	0.29	Equivalently M4241I in ORF 1a
S	Surface glycoprotein	W1214G	3031	184	5.13
nsp3	ADRP, Papain-like proteinase, transmembrane domain 1	A1736V	2964	64	1.85	Equivalently A2554V in ORF 1a
nsp12	RNA-dependent RNA polymerase	A656S	2946	99	0.51	Equivalently A5048S in ORF 1ab
nsp13	Zinc-binding domain, NTPase/helicase domain	P504L	2901	98	2.7	Equivalently P5828L in ORF 1ab
nsp13	Zinc-binding domain, NTPase/helicase domain	Y541C	2872	194	2.38	Equivalently Y5865C in ORF 1ab
N	Nucleocapsid phosphoprotein	P365S	2790	73	0.56
nsp7		S25L	2720	144	3.04	Equivalently S3884L in ORF 1a
N	Nucleocapsid phosphoprotein	D377Y	2663	160	3.95
ORF 3a		K75N	2659	94	1.84
N	Nucleocapsid phosphoprotein	P13L	2633	98	2.7
nsp6	Putative transmembrane domain	M86I	2562	10	0.29	Equivalently M3655I in ORF 1a
ORF 3a		G172V	2550	109	2.76
nsp2		P585S	2526	73	0.56	Equivalently P765S in ORF 1a
nsp14	Exonuclease	N129D	2496	23	0.65	Equivalently N6054D in ORF 1ab
ORF 7b		S5L	2442	144	3.04
nsp16	2'-O-ribose methyltransferase	R216C	2440	180	3.06	Equivalently R7014C in ORF 1ab
S	Surface glycoprotein	A262S	2408	99	0.51
ORF 3a		V13L	2387	32	0.91
nsp2		I559V	2366	30	0.85	Equivalently I739V in ORF 1a
nsp5	3C-like proteinase	K90R	2296	26	0.4	Equivalently K3353R in ORF 1a
N	Nucleocapsid phosphoprotein	P67S	2285	73	0.56
nsp12	RNA-dependent RNA polymerase	A97V	2264	64	1.85	Equivalently A4489V in ORF 1ab
nsp7		M75I	2230	10	0.29	Equivalently M3934I in ORF 1a
nsp6	Putative transmembrane domain	K270R	2167	26	0.4	Equivalently K3839R in ORF 1a
N	Nucleocapsid phosphoprotein	D103Y	2143	160	3.95
nsp5	3C-like proteinase	G71S	2110	55	0.85	Equivalently G3334S in ORF 1a
nsp3	ADRP, Papain-like proteinase, transmembrane domain 1	T1363I	2083	89	2.14	Equivalently T2181I in ORF 1a
nsp6	Putative transmembrane domain	A54S	2019	99	0.51	Equivalently A3623S in ORF 1a
nsp2		V381A	2017	64	1.85	Equivalently V561A in ORF 1a
ORF 8		A65V	2014	64	1.85
nsp3	ADRP, Papain-like proteinase, transmembrane domain 1	T1198K	1952	78	2.1	Equivalently T2016K in ORF 1a
nsp3	ADRP, Papain-like proteinase, transmembrane domain 1	V1786A	1863	64	1.85	Equivalently V2604A in ORF 1a
N	Nucleocapsid phosphoprotein	S197L	1850	144	3.04
ORF 3a		G196V	1830	109	2.76
nsp4	Transmembrane domain 2	F308Y	1820	22	0.48	Equivalently F3071Y in ORF 1a
nsp2		M135I	1811	10	0.29	Equivalently M315I in ORF 1a
ORF 8		V62L	1778	32	0.91
nsp6	Putative transmembrane domain	M143I	1713	10	0.29	Equivalently M3712I in ORF 1a
S	Surface glycoprotein	E583D	1710	45	0.9
N	Nucleocapsid phosphoprotein	T205I	1684	89	2.14
S	Surface glycoprotein	S98F	1664	155	3.45
S	Surface glycoprotein	P272L	1645	98	2.7
S	Surface glycoprotein	R21I	1630	98	2.49
ORF 3a		V202L	1592	32	0.91
S	Surface glycoprotein	M153T	1566	81	1.86
nsp3	ADRP, Papain-like proteinase, transmembrane domain 1	H295Y	1565	83	2.27	Equivalently H1113Y in ORF 1a
S	Surface glycoprotein	D1163Y	1556	160	3.95
N	Nucleocapsid phosphoprotein	S235F	1530	155	3.45
N	Nucleocapsid phosphoprotein	S183Y	1480	143	3.33
nsp3	ADRP, Papain-like proteinase, transmembrane domain 1	Q1884H	1480	24	0.32	Equivalently Q2702H in ORF 1a
ORF 3a		G172R	1458	125	3.58
ORF 3a		Q38R	1454	43	1.13
S	Surface glycoprotein	G1167V	1432	109	2.76
S	Surface glycoprotein	N501Y	1413	142	3.42
nsp3	ADRP, Papain-like proteinase, transmembrane domain 1	A58T	1401	58	0.9	Equivalently A876T in ORF 1a
nsp2		G212D	1396	94	2.37	Equivalently G392D in ORF 1a
nsp2		F10L	1351	22	0.63	Equivalently F190L in ORF 1a
nsp15	EndoRNAse	A81V	1345	64	1.85	Equivalently A6533V in ORF 1ab
N	Nucleocapsid phosphoprotein	R385K	1323	26	0.4
S	Surface glycoprotein	D80Y	1282	160	3.95
nsp3	ADRP, Papain-like proteinase, transmembrane domain 1	M1788I	1256	10	0.29	Equivalently M2606I in ORF 1a
M	Membrane glycoprotein	T175M	1244	81	1.86
nsp12	RNA-dependent RNA polymerase	T76I	1234	89	2.14	Equivalently T4468I in ORF 1ab
S	Surface glycoprotein	P681H	1230	76	2.15
nsp14	Exonuclease	P43L	1219	98	2.7	Equivalently P5968L in ORF 1ab
nsp12	RNA-dependent RNA polymerase	T141I	1199	89	2.14	Equivalently T4533I in ORF 1ab
nsp3	ADRP, Papain-like proteinase, transmembrane domain 1	S1197R	1186	109	2.74	Equivalently S2015R in ORF 1a
nsp6	Putative transmembrane domain	V149F	1169	50	1.43	Equivalently V3718F in ORF 1a
nsp15	EndoRNAse	T114A	1159	58	0.9	Equivalently T6566A in ORF 1ab
nsp3	ADRP, Papain-like proteinase, transmembrane domain 1	A85V	1159	64	1.85	Equivalently A903V in ORF 1a
nsp14	Exonuclease	A320V	1158	64	1.85	Equivalently A6245V in ORF 1ab
S	Surface glycoprotein	D936Y	1146	160	3.95
nsp3	ADRP, Papain-like proteinase, transmembrane domain 1	S126L	1139	144	3.04	Equivalently S944L in ORF 1a
nsp16	2'-O-ribose methyltransferase	R287I	1138	98	2.49	Equivalently R7085I in ORF 1ab
nsp6	Putative transmembrane domain	A46V	1117	64	1.85	Equivalently A3615V in ORF 1a
nsp3	ADRP, Papain-like proteinase, transmembrane domain 1	T183I	1115	89	2.14	Equivalently T1001I in ORF 1a
nsp14	Exonuclease	L177F	1112	22	0.63	Equivalently L6102F in ORF 1ab
nsp4	Transmembrane domain 2	A231V	1106	64	1.85	Equivalently A2994V in ORF 1a
nsp2		A318V	1084	64	1.85	Equivalently A498V in ORF 1a
nsp3	ADRP, Papain-like proteinase, transmembrane domain 1	D218E	1082	45	0.9	Equivalently D1036E in ORF 1a
nsp3	ADRP, Papain-like proteinase, transmembrane domain 1	A480V	1074	64	1.85	Equivalently A1298V in ORF 1a
ORF 8		Q27*	1074	-	-
nsp3	ADRP, Papain-like proteinase, transmembrane domain 1	T1189I	1057	89	2.14	Equivalently T2007I in ORF 1a
ORF 7b		H37L	1057	99	2.59
nsp12	RNA-dependent RNA polymerase	A449V	1056	64	1.85	Equivalently A4841V in ORF 1ab
nsp13	Zinc-binding domain, NTPase/helicase domain	A18V	1042	64	1.85	Equivalently A5342V in ORF 1ab
S	Surface glycoprotein	T716I	1040	89	2.14
nsp3	ADRP, Papain-like proteinase, transmembrane domain 1	P153L	1038	98	2.7	Equivalently P971L in ORF 1a
nsp3	ADRP, Papain-like proteinase, transmembrane domain 1	K429N	1036	94	1.84	Equivalently K1247N in ORF 1a
ORF 3a		A54S	1029	99	0.51
nsp2		L180S	1024	144	3.04	Equivalently L360S in ORF 1a
M	Membrane glycoprotein	D3G	1010	94	2.37
S	Surface glycoprotein	H655Y	1004	83	2.27
ORF 8		R52I	994	98	2.49
N	Nucleocapsid phosphoprotein	S193I	991	142	2.95
nsp14	Exonuclease	A119V	988	64	1.85	Equivalently A6044V in ORF 1ab
N	Nucleocapsid phosphoprotein	Q9H	986	24	0.32
N	Nucleocapsid phosphoprotein	S188L	986	144	3.04
N	Nucleocapsid phosphoprotein	S202N	981	46	1.31
nsp3	ADRP, Papain-like proteinase, transmembrane domain 1	S1424F	977	155	3.45	Equivalently S2242F in ORF 1a
ORF 3a		Q185H	977	24	0.32
ORF 7a		T14I	972	89	2.14
nsp3	ADRP, Papain-like proteinase, transmembrane domain 1	I1412T	971	89	2.14	Equivalently I2230T in ORF 1a
N	Nucleocapsid phosphoprotein	H145Y	968	83	2.27
N	Nucleocapsid phosphoprotein	S190I	960	142	2.95
nsp1	Leader protein	R24C	958	180	3.06	Equivalently R24C in ORF 1a
nsp12	RNA-dependent RNA polymerase	K718N	955	94	1.84	Equivalently K5110N in ORF 1ab
N	Nucleocapsid phosphoprotein	D3L	947	172	4.1
S	Surface glycoprotein	A570D	942	126	2.37
S	Surface glycoprotein	D1118H	939	81	1.72
ORF 8		Y73C	936	194	2.38
S	Surface glycoprotein	S982A	936	99	0.51
nsp3	ADRP, Papain-like proteinase, transmembrane domain 1	A890D	925	126	2.37	Equivalently A1708D in ORF 1a
nsp13	Zinc-binding domain, NTPase/helicase domain	S468L	919	144	3.04	Equivalently S5792L in ORF 1ab
S	Surface glycoprotein	K1073N	901	94	1.84
S	Surface glycoprotein	A688V	895	64	1.85
nsp6	Putative transmembrane domain	L75F	894	22	0.63	Equivalently L3644F in ORF 1a
nsp14	Exonuclease	A274S	892	99	0.51	Equivalently A6199S in ORF 1ab
nsp13	Zinc-binding domain, NTPase/helicase domain	E244D	891	45	0.9	Equivalently E5568D in ORF 1ab
nsp16	2'-O-ribose methyltransferase	K160R	883	26	0.4	Equivalently K6958R in ORF 1ab
S	Surface glycoprotein	P1263L	875	98	2.7
nsp7		M3I	871	10	0.29	Equivalently M3862I in ORF 1a
nsp3	ADRP, Papain-like proteinase, transmembrane domain 1	K384N	863	94	1.84	Equivalently K1202N in ORF 1a
nsp3	ADRP, Papain-like proteinase, transmembrane domain 1	S1285F	860	155	3.45	Equivalently S2103F in ORF 1a
nsp12	RNA-dependent RNA polymerase	T739I	839	89	2.14	Equivalently T5131I in ORF 1ab
nsp1	Leader protein	D75E	836	45	0.9	Equivalently D75E in ORF 1a
nsp14	Exonuclease	F233L	817	22	0.63	Equivalently F6158L in ORF 1ab
S	Surface glycoprotein	T723I	814	89	2.14
nsp13	Zinc-binding domain, NTPase/helicase domain	A446S	809	99	0.51	Equivalently A5770S in ORF 1ab
ORF 3a		A72S	807	99	0.51
nsp15	EndoRNAse	K334N	806	94	1.84	Equivalently K6786N in ORF 1ab
nsp15	EndoRNAse	D335F	804	177	4.27	Equivalently D6787F in ORF 1ab
nsp3	ADRP, Papain-like proteinase, transmembrane domain 1	P1867T	795	38	0.87	Equivalently P2685T in ORF 1a
S	Surface glycoprotein	L54F	794	22	0.63
nsp3	ADRP, Papain-like proteinase, transmembrane domain 1	L930M	788	14	0.41	Equivalently L1748M in ORF 1a
S	Surface glycoprotein	L176F	787	22	0.63
nsp2		A205V	785	64	1.85	Equivalently A385V in ORF 1a
nsp12	RNA-dependent RNA polymerase	D738Y	783	160	3.95	Equivalently D5130Y in ORF 1ab
nsp2		G220D	781	94	2.37	Equivalently G400D in ORF 1a
ORF 3a		H182Y	779	83	2.27
nsp3	ADRP, Papain-like proteinase, transmembrane domain 1	K1077R	777	26	0.4	Equivalently K1895R in ORF 1a
nsp14	Exonuclease	T250I	776	89	2.14	Equivalently T6175I in ORF 1ab
S	Surface glycoprotein	A626S	774	99	0.51
nsp6	Putative transmembrane domain	E195D	773	45	0.9	Equivalently E3764D in ORF 1a
ORF 3a		S171L	767	144	3.04
S	Surface glycoprotein	D253G	760	94	2.37
ORF 3a		S166L	756	144	3.04
nsp3	ADRP, Papain-like proteinase, transmembrane domain 1	T749I	746	89	2.14	Equivalently T1567I in ORF 1a
nsp2		G339S	744	55	0.85	Equivalently G519S in ORF 1a
nsp3	ADRP, Papain-like proteinase, transmembrane domain 1	A994D	744	126	2.37	Equivalently A1812D in ORF 1a
nsp5	3C-like proteinase	D248E	727	45	0.9	Equivalently D3511E in ORF 1a
S	Surface glycoprotein	D215H	727	81	1.72
nsp3	ADRP, Papain-like proteinase, transmembrane domain 1	L198F	726	22	0.63	Equivalently L1016F in ORF 1a
nsp5	3C-like proteinase	A191V	726	64	1.85	Equivalently A3454V in ORF 1a
ORF 3a		V163I	724	30	0.85
S	Surface glycoprotein	Y453F	712	22	0.48
nsp3	ADRP, Papain-like proteinase, transmembrane domain 1	T724I	706	89	2.14	Equivalently T1542I in ORF 1a
nsp1	Leader protein	D48G	703	94	2.37	Equivalently D48G in ORF 1a
nsp3	ADRP, Papain-like proteinase, transmembrane domain 1	E95D	696	45	0.9	Equivalently E913D in ORF 1a
ORF 3a		A110S	693	99	0.51
nsp12	RNA-dependent RNA polymerase	M666I	684	10	0.29	Equivalently M5058I in ORF 1ab
nsp3	ADRP, Papain-like proteinase, transmembrane domain 1	P822S	678	73	0.56	Equivalently P1640S in ORF 1a
N	Nucleocapsid phosphoprotein	R209I	677	98	2.49
nsp13	Zinc-binding domain, NTPase/helicase domain	K460R	674	26	0.4	Equivalently K5784R in ORF 1ab
N	Nucleocapsid phosphoprotein	I292T	668	89	2.14
ORF 3a		H78Y	667	83	2.27
N	Nucleocapsid phosphoprotein	P13T	656	38	0.87
nsp15	EndoRNAse	A217V	640	64	1.85	Equivalently A6669V in ORF 1ab
S	Surface glycoprotein	S255F	635	155	3.45
S	Surface glycoprotein	S256L	635	144	3.04
nsp3	ADRP, Papain-like proteinase, transmembrane domain 1	K1211N	630	94	1.84	Equivalently K2029N in ORF 1a
nsp2		P129L	628	98	2.7	Equivalently P309L in ORF 1a
ORF 3a		T175I	625	89	2.14
nsp3	ADRP, Papain-like proteinase, transmembrane domain 1	G132V	624	109	2.76	Equivalently G950V in ORF 1a
ORF 3a		W131C	617	214	3.34
ORF 6		I33T	613	89	2.14
N	Nucleocapsid phosphoprotein	S33I	606	142	2.95
nsp6	Putative transmembrane domain	A136V	606	64	1.85	Equivalently A3705V in ORF 1a
S	Surface glycoprotein	Q677H	602	24	0.32
nsp1	Leader protein	D144A	601	126	2.37	Equivalently D144A in ORF 1a
nsp2		V198I	599	30	0.85	Equivalently V378I in ORF 1a
N	Nucleocapsid phosphoprotein	P383L	596	98	2.7
N	Nucleocapsid phosphoprotein	M210I	595	10	0.29
M	Membrane glycoprotein	L17I	592	5	0.14
nsp3	ADRP, Papain-like proteinase, transmembrane domain 1	Q180H	592	24	0.32	Equivalently Q998H in ORF 1a
ORF 3a		A99V	591	64	1.85
nsp3	ADRP, Papain-like proteinase, transmembrane domain 1	P1228L	590	98	2.7	Equivalently P2046L in ORF 1a
ORF 3a		R122I	586	98	2.49
nsp14	Exonuclease	S255I	579	142	2.95	Equivalently S6180I in ORF 1ab
nsp15	EndoRNAse	P205S	578	73	0.56	Equivalently P6657S in ORF 1ab
nsp13	Zinc-binding domain, NTPase/helicase domain	V348L	576	32	0.91	Equivalently V5672L in ORF 1ab
ORF 7b		C41F	575	204	2.24
S	Surface glycoprotein	G769V	575	109	2.76
N	Nucleocapsid phosphoprotein	S187L	574	144	3.04
nsp3	ADRP, Papain-like proteinase, transmembrane domain 1	T181I	572	89	2.14	Equivalently T999I in ORF 1a
nsp1	Leader protein	H110Y	571	83	2.27	Equivalently H110Y in ORF 1a
nsp3	ADRP, Papain-like proteinase, transmembrane domain 1	G175S	571	55	0.85	Equivalently G993S in ORF 1a
ORF 3a		L108F	571	22	0.63
nsp15	EndoRNAse	K12R	567	26	0.4	Equivalently K6464R in ORF 1ab
ORF 7a		R80I	563	98	2.49
nsp3	ADRP, Papain-like proteinase, transmembrane domain 1	T127I	562	89	2.14	Equivalently T945I in ORF 1a
nsp16	2'-O-ribose methyltransferase	A34V	561	64	1.85	Equivalently A6832V in ORF 1ab
nsp5	3C-like proteinase	P108L	561	98	2.7	Equivalently P3371L in ORF 1a
nsp5	3C-like proteinase	V212F	558	50	1.43	Equivalently V3475F in ORF 1a
N	Nucleocapsid phosphoprotein	S186Y	556	143	3.33
ORF 8		S67F	556	155	3.45
nsp5	3C-like proteinase	Q83K	553	53	1.06	Equivalently Q3346K in ORF 1a
nsp5	3C-like proteinase	T45I	549	89	2.14	Equivalently T3308I in ORF 1a
nsp2		S196L	547	144	3.04	Equivalently S376L in ORF 1a
nsp13	Zinc-binding domain, NTPase/helicase domain	T599I	545	89	2.14	Equivalently T5923I in ORF 1ab
nsp6	Putative transmembrane domain	G277S	540	55	0.85	Equivalently G3846S in ORF 1a
ORF 3a		L53F	540	22	0.63
ORF 8		Q18*	539	-	-
nsp12	RNA-dependent RNA polymerase	P264T	538	38	0.87	Equivalently P4656T in ORF 1ab
nsp4	Transmembrane domain 2	T295I	536	89	2.14	Equivalently T3058I in ORF 1a
nsp2		E493K	535	57	1.14	Equivalently E673K in ORF 1a
S	Surface glycoprotein	V1176F	535	50	1.43
S	Surface glycoprotein	H49Y	533	83	2.27
ORF 3a		L46F	529	22	0.63
S	Surface glycoprotein	V622F	529	50	1.43
N	Nucleocapsid phosphoprotein	D401Y	527	160	3.95
N	Nucleocapsid phosphoprotein	P199S	525	73	0.56
nsp4	Transmembrane domain 2	A380V	521	64	1.85	Equivalently A3143V in ORF 1a
nsp14	Exonuclease	Q22H	518	24	0.32	Equivalently Q5947H in ORF 1ab
nsp8	Putative primase	Y138H	517	83	2.27	Equivalently Y4080H in ORF 1a
ORF 3a		A23V	514	64	1.85
nsp15	EndoRNAse	V22L	513	32	0.91	Equivalently V6474L in ORF 1ab
nsp12	RNA-dependent RNA polymerase	S647I	512	142	2.95	Equivalently S5039I in ORF 1ab
nsp12	RNA-dependent RNA polymerase	L638F	511	22	0.63	Equivalently L5030F in ORF 1ab
S	Surface glycoprotein	G1124V	511	109	2.76
nsp3	ADRP, Papain-like proteinase, transmembrane domain 1	K487N	508	94	1.84	Equivalently K1305N in ORF 1a
nsp3	ADRP, Papain-like proteinase, transmembrane domain 1	T779I	506	89	2.14	Equivalently T1597I in ORF 1a
nsp2		H194Y	504	83	2.27	Equivalently H374Y in ORF 1a
nsp16	2'-O-ribose methyltransferase	Q6L	503	112	2.7	Equivalently Q6804L in ORF 1ab
nsp3	ADRP, Papain-like proteinase, transmembrane domain 1	K837N	502	94	1.84	Equivalently K1655N in ORF 1a
nsp3	ADRP, Papain-like proteinase, transmembrane domain 1	P985S	501	73	0.56	Equivalently P1803S in ORF 1a
nsp3	ADRP, Papain-like proteinase, transmembrane domain 1	K1077N	501	94	1.84	Equivalently K1895N in ORF 1a
nsp2		T44I	498	89	2.14	Equivalently T224I in ORF 1a
N	Nucleocapsid phosphoprotein	T334I	495	89	2.14
S	Surface glycoprotein	H146Y	494	83	2.27
N	Nucleocapsid phosphoprotein	G204L	492	138	3.67
nsp13	Zinc-binding domain, NTPase/helicase domain	V169F	491	50	1.43	Equivalently V5493F in ORF 1ab
M	Membrane glycoprotein	H125Y	488	83	2.27
nsp12	RNA-dependent RNA polymerase	R279S	488	109	2.74	Equivalently R4671S in ORF 1ab
nsp2		T388I	488	89	2.14	Equivalently T568I in ORF 1a
nsp3	ADRP, Papain-like proteinase, transmembrane domain 1	M951I	487	10	0.29	Equivalently M1769I in ORF 1a
N	Nucleocapsid phosphoprotein	A182S	485	99	0.51
nsp5	3C-like proteinase	P132L	485	98	2.7	Equivalently P3395L in ORF 1a
nsp5	3C-like proteinase	P132S	485	73	0.56	Equivalently P3395S in ORF 1a
nsp16	2'-O-ribose methyltransferase	T35I	484	89	2.14	Equivalently T6833I in ORF 1ab
ORF 7a		T120I	484	89	2.14
M	Membrane glycoprotein	A2V	478	64	1.85
ORF 3a		K16N	478	94	1.84
nsp2		T166I	473	89	2.14	Equivalently T346I in ORF 1a
nsp12	RNA-dependent RNA polymerase	A581S	472	99	0.51	Equivalently A4973S in ORF 1ab
ORF 3a		T14I	470	89	2.14
E	Envelope protein	S68F	467	155	3.45
nsp12	RNA-dependent RNA polymerase	T803I	466	89	2.14	Equivalently T5195I in ORF 1ab
M	Membrane glycoprotein	A2S	464	99	0.51
nsp13	Zinc-binding domain, NTPase/helicase domain	R392C	464	180	3.06	Equivalently R5716C in ORF 1ab
ORF 7a		K72N	464	94	1.84
nsp8	Putative primase	T145I	460	89	2.14	Equivalently T4087I in ORF 1a
nsp1	Leader protein	R124C	459	180	3.06	Equivalently R124C in ORF 1a
nsp8	Putative primase	I107V	456	30	0.85	Equivalently I4049V in ORF 1a
nsp8	Putative primase	L122F	453	22	0.63	Equivalently L4064F in ORF 1a
nsp15	EndoRNAse	V320L	452	32	0.91	Equivalently V6772L in ORF 1ab
nsp2		R218C	452	180	3.06	Equivalently R398C in ORF 1a
nsp3	ADRP, Papain-like proteinase, transmembrane domain 1	K1693N	452	94	1.84	Equivalently K2511N in ORF 1a
nsp2		S211F	451	155	3.45	Equivalently S391F in ORF 1a
ORF 3a		G224C	450	158	2.22
ORF 7a		Q21R	450	43	1.13
S	Surface glycoprotein	N164T	450	65	1.4
nsp3	ADRP, Papain-like proteinase, transmembrane domain 1	S1670F	449	155	3.45	Equivalently S2488F in ORF 1a
nsp3	ADRP, Papain-like proteinase, transmembrane domain 1	T1456I	448	89	2.14	Equivalently T2274I in ORF 1a
nsp6	Putative transmembrane domain	A2V	447	64	1.85	Equivalently A3571V in ORF 1a
ORF 3a		T176I	440	89	2.14
N	Nucleocapsid phosphoprotein	D128Y	439	160	3.95
nsp8	Putative primase	P10S	438	73	0.56	Equivalently P3952S in ORF 1a
S	Surface glycoprotein	A879S	438	99	0.51
ORF 7a		F6L	437	22	0.63
ORF 8		A65S	435	99	0.51
nsp2		L410F	434	22	0.63	Equivalently L590F in ORF 1a
ORF 3a		P104L	434	98	2.7
nsp4	Transmembrane domain 2	A446V	431	64	1.85	Equivalently A3209V in ORF 1a
nsp7		L71F	429	22	0.63	Equivalently L3930F in ORF 1a
nsp13	Zinc-binding domain, NTPase/helicase domain	T127I	426	89	2.14	Equivalently T5451I in ORF 1ab
nsp13	Zinc-binding domain, NTPase/helicase domain	T481M	425	81	1.86	Equivalently T5805M in ORF 1ab
nsp3	ADRP, Papain-like proteinase, transmembrane domain 1	G282V	423	109	2.76	Equivalently G1100V in ORF 1a
S	Surface glycoprotein	D839Y	420	160	3.95
nsp2		T634I	419	89	2.14	Equivalently T814I in ORF 1a
ORF 3a		T151I	418	89	2.14
nsp2		H237R	417	29	0.82	Equivalently H417R in ORF 1a
S	Surface glycoprotein	T95I	417	89	2.14
N	Nucleocapsid phosphoprotein	V72I	416	30	0.85
nsp3	ADRP, Papain-like proteinase, transmembrane domain 1	P1200S	413	73	0.56	Equivalently P2018S in ORF 1a
ORF 8		V32L	412	32	0.91
nsp3	ADRP, Papain-like proteinase, transmembrane domain 1	T1269I	410	89	2.14	Equivalently T2087I in ORF 1a
ORF 3a		L41F	410	22	0.63
M	Membrane glycoprotein	D209Y	409	160	3.95
nsp15	EndoRNAse	V10L	409	32	0.91	Equivalently V6462L in ORF 1ab
nsp15	EndoRNAse	I327L	409	5	0.14	Equivalently I6779L in ORF 1ab
S	Surface glycoprotein	T29I	408	89	2.14
nsp3	ADRP, Papain-like proteinase, transmembrane domain 1	T1004I	407	89	2.14	Equivalently T1822I in ORF 1a
nsp13	Zinc-binding domain, NTPase/helicase domain	P53L	406	98	2.7	Equivalently P5377L in ORF 1ab
nsp4	Transmembrane domain 2	T189I	405	89	2.14	Equivalently T2952I in ORF 1a
N	Nucleocapsid phosphoprotein	D22G	404	94	2.37
nsp16	2'-O-ribose methyltransferase	R216N	401	85	2.04	Equivalently R7014N in ORF 1ab
nsp2		A336V	400	64	1.85	Equivalently A516V in ORF 1a
nsp3	ADRP, Papain-like proteinase, transmembrane domain 1	L1244F	400	22	0.63	Equivalently L2062F in ORF 1a
S	Surface glycoprotein	A520S	399	99	0.51
S	Surface glycoprotein	S939F	398	155	3.45
nsp15	EndoRNAse	V172L	396	32	0.91	Equivalently V6624L in ORF 1ab
nsp4	Transmembrane domain 2	G309C	393	158	2.22	Equivalently G3072C in ORF 1a
nsp5	3C-like proteinase	A260V	393	64	1.85	Equivalently A3523V in ORF 1a
ORF 3a		N257S	393	46	1.31
nsp13	Zinc-binding domain, NTPase/helicase domain	L428F	391	22	0.63	Equivalently L5752F in ORF 1ab
S	Surface glycoprotein	P25S	391	73	0.56
nsp3	ADRP, Papain-like proteinase, transmembrane domain 1	R352C	390	180	3.06	Equivalently R1170C in ORF 1a
nsp6	Putative transmembrane domain	T10I	390	89	2.14	Equivalently T3579I in ORF 1a
S	Surface glycoprotein	D574Y	390	160	3.95
M	Membrane glycoprotein	V70I	389	30	0.85
nsp3	ADRP, Papain-like proteinase, transmembrane domain 1	P340L	389	98	2.7	Equivalently P1158L in ORF 1a
nsp1	Leader protein	E87D	385	45	0.9	Equivalently E87D in ORF 1a
nsp3	ADRP, Papain-like proteinase, transmembrane domain 1	P503S	385	73	0.56	Equivalently P1321S in ORF 1a
nsp3	ADRP, Papain-like proteinase, transmembrane domain 1	T819I	385	89	2.14	Equivalently T1637I in ORF 1a
nsp4	Transmembrane domain 2	M33I	385	10	0.29	Equivalently M2796I in ORF 1a
S	Surface glycoprotein	G261V	385	109	2.76
ORF 3a		G100C	384	158	2.22
nsp1	Leader protein	K120N	383	94	1.84	Equivalently K120N in ORF 1a
S	Surface glycoprotein	D1084Y	382	160	3.95
ORF 3a		D27Y	380	160	3.95
N	Nucleocapsid phosphoprotein	A252S	379	99	0.51
nsp13	Zinc-binding domain, NTPase/helicase domain	A296S	379	99	0.51	Equivalently A5620S in ORF 1ab
nsp4	Transmembrane domain 2	I110T	378	89	2.14	Equivalently I2873T in ORF 1a
nsp3	ADRP, Papain-like proteinase, transmembrane domain 1	D178N	377	23	0.65	Equivalently D996N in ORF 1a
nsp15	EndoRNAse	M271I	375	10	0.29	Equivalently M6723I in ORF 1ab
nsp13	Zinc-binding domain, NTPase/helicase domain	P78L	373	98	2.7	Equivalently P5402L in ORF 1ab
nsp15	EndoRNAse	Q19H	373	24	0.32	Equivalently Q6471H in ORF 1ab
nsp3	ADRP, Papain-like proteinase, transmembrane domain 1	P1228S	373	73	0.56	Equivalently P2046S in ORF 1a
ORF 8		E92K	372	57	1.14
nsp3	ADRP, Papain-like proteinase, transmembrane domain 1	K462N	371	94	1.84	Equivalently K1280N in ORF 1a
nsp3	ADRP, Papain-like proteinase, transmembrane domain 1	E229G	370	98	2.78	Equivalently E1047G in ORF 1a
S	Surface glycoprotein	C1253F	369	204	2.24
ORF 3a		R126S	366	109	2.74
nsp3	ADRP, Papain-like proteinase, transmembrane domain 1	L1706F	365	22	0.63	Equivalently L2524F in ORF 1a
nsp3	ADRP, Papain-like proteinase, transmembrane domain 1	H1539Y	364	83	2.27	Equivalently H2357Y in ORF 1a
nsp3	ADRP, Papain-like proteinase, transmembrane domain 1	S1807F	364	155	3.45	Equivalently S2625F in ORF 1a
nsp15	EndoRNAse	V38F	362	50	1.43	Equivalently V6490F in ORF 1ab
S	Surface glycoprotein	Q675H	362	24	0.32
S	Surface glycoprotein	V1068F	361	50	1.43
nsp3	ADRP, Papain-like proteinase, transmembrane domain 1	A1431V	360	64	1.85	Equivalently A2249V in ORF 1a
ORF 8		E110*	360	-	-
N	Nucleocapsid phosphoprotein	A359S	358	99	0.51
nsp16	2'-O-ribose methyltransferase	V167A	358	64	1.85	Equivalently V6965A in ORF 1ab
nsp4	Transmembrane domain 2	L111K	358	106	2.98	Equivalently L2874K in ORF 1a
nsp12	RNA-dependent RNA polymerase	A16V	357	64	1.85	Equivalently A4408V in ORF 1ab
nsp16	2'-O-ribose methyltransferase	P215L	357	98	2.7	Equivalently P7013L in ORF 1ab
nsp16	2'-O-ribose methyltransferase	M270I	357	10	0.29	Equivalently M7068I in ORF 1ab
nsp12	RNA-dependent RNA polymerase	S434F	356	155	3.45	Equivalently S4826F in ORF 1ab
nsp15	EndoRNAse	V66L	356	32	0.91	Equivalently V6518L in ORF 1ab
nsp3	ADRP, Papain-like proteinase, transmembrane domain 1	K1771R	354	26	0.4	Equivalently K2589R in ORF 1a
ORF 8		E64*	354	-	-
nsp4	Transmembrane domain 2	L106F	352	22	0.63	Equivalently L2869F in ORF 1a
nsp16	2'-O-ribose methyltransferase	P134S	349	73	0.56	Equivalently P6932S in ORF 1ab
nsp3	ADRP, Papain-like proteinase, transmembrane domain 1	S284G	347	55	0.85	Equivalently S1102G in ORF 1a
nsp8	Putative primase	T148I	347	89	2.14	Equivalently T4090I in ORF 1a
ORF 3a		Y156C	347	194	2.38
nsp14	Exonuclease	K349N	346	94	1.84	Equivalently K6274N in ORF 1ab
nsp13	Zinc-binding domain, NTPase/helicase domain	L581F	344	22	0.63	Equivalently L5905F in ORF 1ab
ORF 8		P36S	344	73	0.56
ORF 3a		G172C	342	158	2.22
ORF 3a		D155Y	341	160	3.95
N	Nucleocapsid phosphoprotein	R32H	339	29	0.82
nsp8	Putative primase	M129I	339	10	0.29	Equivalently M4071I in ORF 1a
nsp13	Zinc-binding domain, NTPase/helicase domain	S485L	338	144	3.04	Equivalently S5809L in ORF 1ab
nsp2		D23Y	338	160	3.95	Equivalently D203Y in ORF 1a
nsp2		R27C	337	180	3.06	Equivalently R207C in ORF 1a
nsp2		S122F	337	155	3.45	Equivalently S302F in ORF 1a
N	Nucleocapsid phosphoprotein	G34W	336	184	5.13
nsp12	RNA-dependent RNA polymerase	L261C	333	197	1.65	Equivalently L4653C in ORF 1ab
nsp4	Transmembrane domain 2	A457V	333	64	1.85	Equivalently A3220V in ORF 1a
nsp3	ADRP, Papain-like proteinase, transmembrane domain 1	R646W	332	101	2.72	Equivalently R1464W in ORF 1a
S	Surface glycoprotein	M153I	331	10	0.29
nsp16	2'-O-ribose methyltransferase	Q28H	330	24	0.32	Equivalently Q6826H in ORF 1ab
nsp3	ADRP, Papain-like proteinase, transmembrane domain 1	T1063I	330	89	2.14	Equivalently T1881I in ORF 1a
ORF 3a		H93Y	330	83	2.27
N	Nucleocapsid phosphoprotein	A208G	328	60	0.91
nsp6	Putative transmembrane domain	A51V	328	64	1.85	Equivalently A3620V in ORF 1a
nsp3	ADRP, Papain-like proteinase, transmembrane domain 1	T1348I	327	89	2.14	Equivalently T2166I in ORF 1a
ORF 3a		D173G	327	94	2.37
nsp3	ADRP, Papain-like proteinase, transmembrane domain 1	A579V	325	64	1.85	Equivalently A1397V in ORF 1a
ORF 7b		W29L	325	61	1.73
nsp14	Exonuclease	C208S	323	112	1.84	Equivalently C6133S in ORF 1ab
nsp2		P129S	323	73	0.56	Equivalently P309S in ORF 1a
S	Surface glycoprotein	Q23H	323	24	0.32
nsp3	ADRP, Papain-like proteinase, transmembrane domain 1	A534V	322	64	1.85	Equivalently A1352V in ORF 1a
nsp8	Putative primase	Q158H	322	24	0.32	Equivalently Q4100H in ORF 1a
S	Surface glycoprotein	P26S	322	73	0.56
nsp13	Zinc-binding domain, NTPase/helicase domain	P47L	321	98	2.7	Equivalently P5371L in ORF 1ab
nsp14	Exonuclease	T16I	321	89	2.14	Equivalently T5941I in ORF 1ab
nsp13	Zinc-binding domain, NTPase/helicase domain	E341D	320	45	0.9	Equivalently E5665D in ORF 1ab
nsp2		L274F	320	22	0.63	Equivalently L454F in ORF 1a
S	Surface glycoprotein	S929T	320	58	0.89
nsp13	Zinc-binding domain, NTPase/helicase domain	L297F	319	22	0.63	Equivalently L5621F in ORF 1ab
nsp3	ADRP, Papain-like proteinase, transmembrane domain 1	A861V	319	64	1.85	Equivalently A1679V in ORF 1a
N	Nucleocapsid phosphoprotein	Q384H	318	24	0.32
nsp11		S6L	318	144	3.04	Equivalently S4398L in ORF 1a
nsp12	RNA-dependent RNA polymerase	S6L	318	144	3.04	Equivalently S4398L in ORF 1ab
nsp5	3C-like proteinase	G278R	318	125	3.58	Equivalently G3541R in ORF 1a
nsp6	Putative transmembrane domain	D159N	318	23	0.65	Equivalently D3728N in ORF 1a
S	Surface glycoprotein	P26L	316	98	2.7
nsp2		S138L	314	144	3.04	Equivalently S318L in ORF 1a
nsp3	ADRP, Papain-like proteinase, transmembrane domain 1	A465V	314	64	1.85	Equivalently A1283V in ORF 1a
nsp14	Exonuclease	R212K	313	26	0.4	Equivalently R6137K in ORF 1ab
nsp3	ADRP, Papain-like proteinase, transmembrane domain 1	M1441I	312	10	0.29	Equivalently M2259I in ORF 1a
nsp13	Zinc-binding domain, NTPase/helicase domain	Q518H	311	24	0.32	Equivalently Q5842H in ORF 1ab
nsp3	ADRP, Papain-like proteinase, transmembrane domain 1	P1103S	311	73	0.56	Equivalently P1921S in ORF 1a
nsp2		Q427H	310	24	0.32	Equivalently Q607H in ORF 1a
nsp16	2'-O-ribose methyltransferase	S33R	309	109	2.74	Equivalently S6831R in ORF 1ab
ORF 6		W27L	306	61	1.73
nsp12	RNA-dependent RNA polymerase	P227L	305	98	2.7	Equivalently P4619L in ORF 1ab
nsp3	ADRP, Papain-like proteinase, transmembrane domain 1	P874S	305	73	0.56	Equivalently P1692S in ORF 1a
nsp3	ADRP, Papain-like proteinase, transmembrane domain 1	P1326L	305	98	2.7	Equivalently P2144L in ORF 1a
nsp4	Transmembrane domain 2	S336L	305	144	3.04	Equivalently S3099L in ORF 1a
ORF 3a		V77F	304	50	1.43
nsp3	ADRP, Papain-like proteinase, transmembrane domain 1	A231V	303	64	1.85	Equivalently A1049V in ORF 1a
ORF 7a		S81L	303	144	3.04
nsp14	Exonuclease	L157F	302	22	0.63	Equivalently L6082F in ORF 1ab
nsp3	ADRP, Papain-like proteinase, transmembrane domain 1	T1036I	302	89	2.14	Equivalently T1854I in ORF 1a
N	Nucleocapsid phosphoprotein	L139F	301	22	0.63
S	Surface glycoprotein	A1078S	301	99	0.51
S	Surface glycoprotein	A701V	300	64	1.85
ORF 8		H40Y	299	83	2.27
nsp8	Putative primase	T141M	298	81	1.86	Equivalently T4083M in ORF 1a
ORF 3a		T89I	297	89	2.14
nsp3	ADRP, Papain-like proteinase, transmembrane domain 1	P822L	294	98	2.7	Equivalently P1640L in ORF 1a
N	Nucleocapsid phosphoprotein	P383S	293	73	0.56
S	Surface glycoprotein	V1228L	293	32	0.91
nsp3	ADRP, Papain-like proteinase, transmembrane domain 1	A1105V	292	64	1.85	Equivalently A1923V in ORF 1a
ORF 7b		H42Q	292	24	0.32
S	Surface glycoprotein	S12F	290	155	3.45
S	Surface glycoprotein	Q613H	290	24	0.32
nsp6	Putative transmembrane domain	L260F	289	22	0.63	Equivalently L3829F in ORF 1a
S	Surface glycoprotein	A1020S	289	99	0.51
N	Nucleocapsid phosphoprotein	L230F	288	22	0.63
nsp16	2'-O-ribose methyltransferase	K182N	288	94	1.84	Equivalently K6980N in ORF 1ab
nsp3	ADRP, Papain-like proteinase, transmembrane domain 1	P1103L	288	98	2.7	Equivalently P1921L in ORF 1a
S	Surface glycoprotein	E780Q	287	29	0.84
nsp14	Exonuclease	T113I	286	89	2.14	Equivalently T6038I in ORF 1ab
nsp3	ADRP, Papain-like proteinase, transmembrane domain 1	P141S	286	73	0.56	Equivalently P959S in ORF 1a
S	Surface glycoprotein	G1219C	286	158	2.22
nsp12	RNA-dependent RNA polymerase	E744D	285	45	0.9	Equivalently E5136D in ORF 1ab
nsp2		A411S	285	99	0.51	Equivalently A591S in ORF 1a
nsp3	ADRP, Papain-like proteinase, transmembrane domain 1	S915F	285	155	3.45	Equivalently S1733F in ORF 1a
ORF 7b		A15S	285	99	0.51
N	Nucleocapsid phosphoprotein	A267V	284	64	1.85
ORF 3a		K21N	284	94	1.84
ORF 3a		S58N	284	46	1.31
S	Surface glycoprotein	V772I	284	30	0.85
nsp4	Transmembrane domain 2	A307V	281	64	1.85	Equivalently A3070V in ORF 1a
nsp5	3C-like proteinase	A266V	281	64	1.85	Equivalently A3529V in ORF 1a
nsp10		D64E	280	45	0.9	Equivalently D4317E in ORF 1a
S	Surface glycoprotein	L189F	280	22	0.63
nsp12	RNA-dependent RNA polymerase	G44V	279	109	2.76	Equivalently G4436V in ORF 1ab
nsp3	ADRP, Papain-like proteinase, transmembrane domain 1	P74S	279	73	0.56	Equivalently P892S in ORF 1a
E	Envelope protein	P71L	278	98	2.7
nsp14	Exonuclease	D324Y	278	160	3.95	Equivalently D6249Y in ORF 1ab
M	Membrane glycoprotein	C86F	277	204	2.24
nsp2		T573I	277	89	2.14	Equivalently T753I in ORF 1a
ORF 10		P10S	277	73	0.56
ORF 3a		Q213K	275	53	1.06
S	Surface glycoprotein	V143F	275	50	1.43
S	Surface glycoprotein	S698L	273	144	3.04
S	Surface glycoprotein	V1122L	273	32	0.91
S	Surface glycoprotein	A27S	270	99	0.51
S	Surface glycoprotein	Q675R	270	43	1.13
N	Nucleocapsid phosphoprotein	S180I	269	142	2.95
nsp13	Zinc-binding domain, NTPase/helicase domain	L176F	269	22	0.63	Equivalently L5500F in ORF 1ab
nsp14	Exonuclease	S374A	269	99	0.51	Equivalently S6299A in ORF 1ab
nsp6	Putative transmembrane domain	T181I	269	89	2.14	Equivalently T3750I in ORF 1a
nsp2		S591C	268	112	1.84	Equivalently S771C in ORF 1a
N	Nucleocapsid phosphoprotein	N196S	267	46	1.31
nsp2		S430L	267	144	3.04	Equivalently S610L in ORF 1a
nsp13	Zinc-binding domain, NTPase/helicase domain	T588I	266	89	2.14	Equivalently T5912I in ORF 1ab
nsp14	Exonuclease	H26Y	266	83	2.27	Equivalently H5951Y in ORF 1ab
nsp2		H208Y	266	83	2.27	Equivalently H388Y in ORF 1a
nsp6	Putative transmembrane domain	F184V	266	50	1.43	Equivalently F3753V in ORF 1a
nsp3	ADRP, Papain-like proteinase, transmembrane domain 1	N1785D	265	23	0.65	Equivalently N2603D in ORF 1a
nsp8	Putative primase	V34F	264	50	1.43	Equivalently V3976F in ORF 1a
ORF 7b		E33*	264	-	-
S	Surface glycoprotein	G1219V	263	109	2.76
nsp10		T102I	262	89	2.14	Equivalently T4355I in ORF 1a
nsp14	Exonuclease	P327S	262	73	0.56	Equivalently P6252S in ORF 1ab
nsp3	ADRP, Papain-like proteinase, transmembrane domain 1	V202F	262	50	1.43	Equivalently V1020F in ORF 1a
nsp3	ADRP, Papain-like proteinase, transmembrane domain 1	N1080S	262	46	1.31	Equivalently N1898S in ORF 1a
S	Surface glycoprotein	G446V	262	109	2.76
E	Envelope protein	P71S	261	73	0.56
nsp3	ADRP, Papain-like proteinase, transmembrane domain 1	G255V	261	109	2.76	Equivalently G1073V in ORF 1a
nsp6	Putative transmembrane domain	M183I	261	10	0.29	Equivalently M3752I in ORF 1a
nsp1	Leader protein	G98V	260	109	2.76	Equivalently G98V in ORF 1a
nsp3	ADRP, Papain-like proteinase, transmembrane domain 1	T1022I	260	89	2.14	Equivalently T1840I in ORF 1a
S	Surface glycoprotein	M1229I	260	10	0.29
N	Nucleocapsid phosphoprotein	R40C	259	180	3.06
nsp15	EndoRNAse	V127F	259	50	1.43	Equivalently V6579F in ORF 1ab
nsp2		A306V	259	64	1.85	Equivalently A486V in ORF 1a
ORF 3a		L85F	259	22	0.63
nsp13	Zinc-binding domain, NTPase/helicase domain	P504S	257	73	0.56	Equivalently P5828S in ORF 1ab
nsp14	Exonuclease	P203L	257	98	2.7	Equivalently P6128L in ORF 1ab
nsp3	ADRP, Papain-like proteinase, transmembrane domain 1	V1243F	257	50	1.43	Equivalently V2061F in ORF 1a
nsp3	ADRP, Papain-like proteinase, transmembrane domain 1	P1403L	257	98	2.7	Equivalently P2221L in ORF 1a
N	Nucleocapsid phosphoprotein	P13S	256	73	0.56
nsp3	ADRP, Papain-like proteinase, transmembrane domain 1	P1403S	256	73	0.56	Equivalently P2221S in ORF 1a
N	Nucleocapsid phosphoprotein	K374R	255	26	0.4
nsp3	ADRP, Papain-like proteinase, transmembrane domain 1	Q764H	255	24	0.32	Equivalently Q1582H in ORF 1a
nsp4	Transmembrane domain 2	M458I	255	10	0.29	Equivalently M3221I in ORF 1a
nsp12	RNA-dependent RNA polymerase	N215S	254	46	1.31	Equivalently N4607S in ORF 1ab
nsp13	Zinc-binding domain, NTPase/helicase domain	K276R	254	26	0.4	Equivalently K5600R in ORF 1ab
nsp15	EndoRNAse	R206S	254	109	2.74	Equivalently R6658S in ORF 1ab
nsp2		L400F	254	22	0.63	Equivalently L580F in ORF 1a
nsp2		L550F	254	22	0.63	Equivalently L730F in ORF 1a
nsp6	Putative transmembrane domain	G188V	253	109	2.76	Equivalently G3757V in ORF 1a
ORF 3a		W69L	253	61	1.73
M	Membrane glycoprotein	V70F	252	50	1.43
nsp15	EndoRNAse	P270L	252	98	2.7	Equivalently P6722L in ORF 1ab
nsp3	ADRP, Papain-like proteinase, transmembrane domain 1	P340S	252	73	0.56	Equivalently P1158S in ORF 1a
ORF 8		T26I	250	89	2.14
nsp4	Transmembrane domain 2	S137L	249	144	3.04	Equivalently S2900L in ORF 1a
nsp3	ADRP, Papain-like proteinase, transmembrane domain 1	T64I	248	89	2.14	Equivalently T882I in ORF 1a
nsp3	ADRP, Papain-like proteinase, transmembrane domain 1	V1069I	248	30	0.85	Equivalently V1887I in ORF 1a
nsp13	Zinc-binding domain, NTPase/helicase domain	V226L	247	32	0.91	Equivalently V5550L in ORF 1ab
S	Surface glycoprotein	L822F	247	22	0.63
S	Surface glycoprotein	S254F	246	155	3.45
S	Surface glycoprotein	T632N	246	65	1.4
ORF 3a		T64I	245	89	2.14
nsp2		T547I	244	89	2.14	Equivalently T727I in ORF 1a
nsp3	ADRP, Papain-like proteinase, transmembrane domain 1	G1440V	244	109	2.76	Equivalently G2258V in ORF 1a
nsp4	Transmembrane domain 2	S481L	244	144	3.04	Equivalently S3244L in ORF 1a
S	Surface glycoprotein	D138Y	244	160	3.95
N	Nucleocapsid phosphoprotein	T391I	243	89	2.14
ORF 3a		L15F	243	22	0.63
N	Nucleocapsid phosphoprotein	T393I	242	89	2.14
nsp2		A360V	242	64	1.85	Equivalently A540V in ORF 1a
ORF 3a		S40L	242	144	3.04
ORF 6		D61L	242	172	4.1
nsp2		K454N	241	94	1.84	Equivalently K634N in ORF 1a
nsp2		L462F	241	22	0.63	Equivalently L642F in ORF 1a
nsp3	ADRP, Papain-like proteinase, transmembrane domain 1	A1711V	241	64	1.85	Equivalently A2529V in ORF 1a
ORF 10		S23F	241	155	3.45
ORF 3a		L52F	241	22	0.63
nsp14	Exonuclease	P297S	240	73	0.56	Equivalently P6222S in ORF 1ab
nsp3	ADRP, Papain-like proteinase, transmembrane domain 1	L1221F	240	22	0.63	Equivalently L2039F in ORF 1a
nsp2		H237Y	239	83	2.27	Equivalently H417Y in ORF 1a
nsp2		T371I	239	89	2.14	Equivalently T551I in ORF 1a
nsp3	ADRP, Papain-like proteinase, transmembrane domain 1	I441V	239	30	0.85	Equivalently I1259V in ORF 1a
nsp8	Putative primase	T123I	239	89	2.14	Equivalently T4065I in ORF 1a
ORF 3a		S165F	239	155	3.45
S	Surface glycoprotein	T572I	239	89	2.14
E	Envelope protein	L73F	238	22	0.63
nsp15	EndoRNAse	G17R	238	125	3.58	Equivalently G6469R in ORF 1ab
nsp2		S263F	238	155	3.45	Equivalently S443F in ORF 1a
nsp4	Transmembrane domain 2	H313Y	238	83	2.27	Equivalently H3076Y in ORF 1a
nsp13	Zinc-binding domain, NTPase/helicase domain	A505V	237	64	1.85	Equivalently A5829V in ORF 1ab
nsp2		G548C	237	158	2.22	Equivalently G728C in ORF 1a
ORF 7a		T39I	237	89	2.14
M	Membrane glycoprotein	V60L	236	32	0.91
nsp5	3C-like proteinase	V247F	236	50	1.43	Equivalently V3510F in ORF 1a
nsp3	ADRP, Papain-like proteinase, transmembrane domain 1	H1274Y	234	83	2.27	Equivalently H2092Y in ORF 1a
nsp4	Transmembrane domain 2	S34F	234	155	3.45	Equivalently S2797F in ORF 1a
N	Nucleocapsid phosphoprotein	A211V	233	64	1.85
nsp3	ADRP, Papain-like proteinase, transmembrane domain 1	T1306I	233	89	2.14	Equivalently T2124I in ORF 1a
nsp6	Putative transmembrane domain	L167F	233	22	0.63	Equivalently L3736F in ORF 1a
nsp12	RNA-dependent RNA polymerase	Q822H	232	24	0.32	Equivalently Q5214H in ORF 1ab
ORF 7a		T28I	232	89	2.14
N	Nucleocapsid phosphoprotein	G238C	231	158	2.22
N	Nucleocapsid phosphoprotein	H300Y	231	83	2.27
N	Nucleocapsid phosphoprotein	T362I	231	89	2.14
nsp13	Zinc-binding domain, NTPase/helicase domain	A598V	231	64	1.85	Equivalently A5922V in ORF 1ab
nsp3	ADRP, Papain-like proteinase, transmembrane domain 1	V575L	231	32	0.91	Equivalently V1393L in ORF 1a
N	Nucleocapsid phosphoprotein	T379I	230	89	2.14
nsp2		R4C	230	180	3.06	Equivalently R184C in ORF 1a
nsp3	ADRP, Papain-like proteinase, transmembrane domain 1	Y952H	230	83	2.27	Equivalently Y1770H in ORF 1a
ORF 7b		S31L	230	144	3.04
nsp12	RNA-dependent RNA polymerase	D63Y	229	160	3.95	Equivalently D4455Y in ORF 1ab
nsp3	ADRP, Papain-like proteinase, transmembrane domain 1	P278S	228	73	0.56	Equivalently P1096S in ORF 1a
ORF 6		L4P	227	98	2.7
S	Surface glycoprotein	V687L	227	32	0.91
N	Nucleocapsid phosphoprotein	T135I	226	89	2.14
nsp2		A361V	226	64	1.85	Equivalently A541V in ORF 1a
nsp6	Putative transmembrane domain	I7T	226	89	2.14	Equivalently I3576T in ORF 1a
ORF 3a		T229I	226	89	2.14
ORF 7a		V104F	226	50	1.43
S	Surface glycoprotein	A845S	226	99	0.51
N	Nucleocapsid phosphoprotein	T325I	225	89	2.14
S	Surface glycoprotein	T859I	225	89	2.14
nsp12	RNA-dependent RNA polymerase	M924L	224	14	0.41	Equivalently M5316L in ORF 1ab
nsp2		P568L	224	98	2.7	Equivalently P748L in ORF 1a
nsp8	Putative primase	L9F	224	22	0.63	Equivalently L3951F in ORF 1a
ORF 3a		P240S	224	73	0.56
nsp3	ADRP, Papain-like proteinase, transmembrane domain 1	P1442L	223	98	2.7	Equivalently P2260L in ORF 1a
nsp12	RNA-dependent RNA polymerase	A443V	222	64	1.85	Equivalently A4835V in ORF 1ab
nsp12	RNA-dependent RNA polymerase	K267N	221	94	1.84	Equivalently K4659N in ORF 1ab
S	Surface glycoprotein	S640F	221	155	3.45
N	Nucleocapsid phosphoprotein	N29H	219	68	1.29
N	Nucleocapsid phosphoprotein	T247I	219	89	2.14
nsp12	RNA-dependent RNA polymerase	M601I	219	10	0.29	Equivalently M4993I in ORF 1ab
nsp13	Zinc-binding domain, NTPase/helicase domain	D260Y	219	160	3.95	Equivalently D5584Y in ORF 1ab
ORF 10		L17P	218	98	2.7
nsp2		A26V	217	64	1.85	Equivalently A206V in ORF 1a
S	Surface glycoprotein	H245Y	217	83	2.27
N	Nucleocapsid phosphoprotein	R195I	216	98	2.49
nsp8	Putative primase	A25S	216	99	0.51	Equivalently A3967S in ORF 1a
ORF 3a		V202I	216	30	0.85
ORF 3a		L83F	215	22	0.63
N	Nucleocapsid phosphoprotein	D402Y	214	160	3.95
nsp3	ADRP, Papain-like proteinase, transmembrane domain 1	L1791F	214	22	0.63	Equivalently L2609F in ORF 1a
nsp3	ADRP, Papain-like proteinase, transmembrane domain 1	E1801Q	214	29	0.84	Equivalently E2619Q in ORF 1a
ORF 8		A51V	214	64	1.85
S	Surface glycoprotein	M1237I	213	10	0.29
nsp16	2'-O-ribose methyltransferase	L126F	212	22	0.63	Equivalently L6924F in ORF 1ab
nsp2		L271F	212	22	0.63	Equivalently L451F in ORF 1a
nsp12	RNA-dependent RNA polymerase	A185V	211	64	1.85	Equivalently A4577V in ORF 1ab
nsp3	ADRP, Papain-like proteinase, transmembrane domain 1	T1830I	211	89	2.14	Equivalently T2648I in ORF 1a
S	Surface glycoprotein	F1052L	211	22	0.63
nsp8	Putative primase	R51C	210	180	3.06	Equivalently R3993C in ORF 1a
ORF 3a		A23S	210	99	0.51
nsp3	ADRP, Papain-like proteinase, transmembrane domain 1	V325F	209	50	1.43	Equivalently V1143F in ORF 1a
nsp3	ADRP, Papain-like proteinase, transmembrane domain 1	P1159L	208	98	2.7	Equivalently P1977L in ORF 1a
nsp3	ADRP, Papain-like proteinase, transmembrane domain 1	V1229F	208	50	1.43	Equivalently V2047F in ORF 1a
nsp4	Transmembrane domain 2	G232V	208	109	2.76	Equivalently G2995V in ORF 1a
ORF 7a		E121*	208	-	-
nsp3	ADRP, Papain-like proteinase, transmembrane domain 1	D165G	207	94	2.37	Equivalently D983G in ORF 1a
nsp6	Putative transmembrane domain	E39D	207	45	0.9	Equivalently E3608D in ORF 1a
nsp3	ADRP, Papain-like proteinase, transmembrane domain 1	S1699F	206	155	3.45	Equivalently S2517F in ORF 1a
nsp1	Leader protein	E37D	205	45	0.9	Equivalently E37D in ORF 1a
nsp2		A476V	205	64	1.85	Equivalently A656V in ORF 1a
nsp3	ADRP, Papain-like proteinase, transmembrane domain 1	Y1009H	205	83	2.27	Equivalently Y1827H in ORF 1a
nsp2		E453D	204	45	0.9	Equivalently E633D in ORF 1a
nsp3	ADRP, Papain-like proteinase, transmembrane domain 1	A655V	204	64	1.85	Equivalently A1473V in ORF 1a
nsp3	ADRP, Papain-like proteinase, transmembrane domain 1	P1200L	204	98	2.7	Equivalently P2018L in ORF 1a
nsp4	Transmembrane domain 2	T492I	204	89	2.14	Equivalently T3255I in ORF 1a
nsp8	Putative primase	K36Q	204	53	1.06	Equivalently K3978Q in ORF 1a
ORF 7a		F87L	204	22	0.63
S	Surface glycoprotein	R190M	204	92	2.29
nsp3	ADRP, Papain-like proteinase, transmembrane domain 1	E1008D	203	45	0.9	Equivalently E1826D in ORF 1a
ORF 7a		L96F	203	22	0.63
S	Surface glycoprotein	G999C	203	158	2.22
nsp12	RNA-dependent RNA polymerase	V588L	202	32	0.91	Equivalently V4980L in ORF 1ab
nsp12	RNA-dependent RNA polymerase	T806I	202	89	2.14	Equivalently T5198I in ORF 1ab
S	Surface glycoprotein	V1264L	202	32	0.91
nsp14	Exonuclease	I150T	201	89	2.14	Equivalently I6075T in ORF 1ab
nsp15	EndoRNAse	D91Y	201	160	3.95	Equivalently D6543Y in ORF 1ab
nsp2		L501F	201	22	0.63	Equivalently L681F in ORF 1a
nsp3	ADRP, Papain-like proteinase, transmembrane domain 1	P74L	201	98	2.7	Equivalently P892L in ORF 1a
nsp3	ADRP, Papain-like proteinase, transmembrane domain 1	A1305V	201	64	1.85	Equivalently A2123V in ORF 1a
N	Nucleocapsid phosphoprotein	A55S	200	99	0.51
N	Nucleocapsid phosphoprotein	D341N	200	23	0.65
nsp9	ssRNA-binding protein	L42F	200	22	0.63	Equivalently L4182F in ORF 1a
S	Surface glycoprotein	P812L	200	98	2.7
N	Nucleocapsid phosphoprotein	A152S	199	99	0.51
N	Nucleocapsid phosphoprotein	Q289H	199	24	0.32
nsp4	Transmembrane domain 2	D279N	199	23	0.65	Equivalently D3042N in ORF 1a
ORF 7a		P45R	199	103	2.9
ORF 8		D35Y	199	160	3.95
nsp12	RNA-dependent RNA polymerase	A529V	198	64	1.85	Equivalently A4921V in ORF 1ab
ORF 10		R24L	198	102	2.62
S	Surface glycoprotein	Q957L	198	112	2.7
N	Nucleocapsid phosphoprotein	A414S	197	99	0.51
ORF 8		D63G	197	94	2.37
nsp1	Leader protein	E57G	196	98	2.78	Equivalently E57G in ORF 1a
nsp12	RNA-dependent RNA polymerase	A777S	196	99	0.51	Equivalently A5169S in ORF 1ab
nsp15	EndoRNAse	T285I	196	89	2.14	Equivalently T6737I in ORF 1ab
nsp4	Transmembrane domain 2	T204I	196	89	2.14	Equivalently T2967I in ORF 1a
S	Surface glycoprotein	M1237T	196	81	1.86
N	Nucleocapsid phosphoprotein	Q229H	195	24	0.32
nsp5	3C-like proteinase	A234V	195	64	1.85	Equivalently A3497V in ORF 1a
S	Surface glycoprotein	T20I	195	89	2.14
N	Nucleocapsid phosphoprotein	A119S	194	99	0.51
nsp3	ADRP, Papain-like proteinase, transmembrane domain 1	A886S	194	99	0.51	Equivalently A1704S in ORF 1a
nsp6	Putative transmembrane domain	L207F	194	22	0.63	Equivalently L3776F in ORF 1a
N	Nucleocapsid phosphoprotein	S327L	193	144	3.04
ORF 3a		T12I	193	89	2.14
ORF 3a		A99S	193	99	0.51
nsp13	Zinc-binding domain, NTPase/helicase domain	P53S	192	73	0.56	Equivalently P5377S in ORF 1ab
nsp13	Zinc-binding domain, NTPase/helicase domain	S74P	192	73	0.56	Equivalently S5398P in ORF 1ab
ORF 3a		G44V	192	109	2.76
ORF 8		C25F	192	204	2.24
ORF 8		P30L	192	98	2.7
nsp3	ADRP, Papain-like proteinase, transmembrane domain 1	S1296F	191	155	3.45	Equivalently S2114F in ORF 1a
nsp3	ADRP, Papain-like proteinase, transmembrane domain 1	T1866I	191	89	2.14	Equivalently T2684I in ORF 1a
nsp2		P91S	190	73	0.56	Equivalently P271S in ORF 1a
nsp3	ADRP, Papain-like proteinase, transmembrane domain 1	S1467F	190	155	3.45	Equivalently S2285F in ORF 1a
nsp12	RNA-dependent RNA polymerase	S451I	189	142	2.95	Equivalently S4843I in ORF 1ab
nsp3	ADRP, Papain-like proteinase, transmembrane domain 1	M560I	189	10	0.29	Equivalently M1378I in ORF 1a
nsp3	ADRP, Papain-like proteinase, transmembrane domain 1	T864I	189	89	2.14	Equivalently T1682I in ORF 1a
nsp4	Transmembrane domain 2	H36Y	189	83	2.27	Equivalently H2799Y in ORF 1a
S	Surface glycoprotein	C1250F	189	204	2.24
N	Nucleocapsid phosphoprotein	D144Y	188	160	3.95
nsp1	Leader protein	E37K	188	57	1.14	Equivalently E37K in ORF 1a
nsp1	Leader protein	G132V	188	109	2.76	Equivalently G132V in ORF 1a
nsp14	Exonuclease	M72I	188	10	0.29	Equivalently M5997I in ORF 1ab
nsp16	2'-O-ribose methyltransferase	T151I	188	89	2.14	Equivalently T6949I in ORF 1ab
nsp2		G600V	188	109	2.76	Equivalently G780V in ORF 1a
nsp4	Transmembrane domain 2	L264F	188	22	0.63	Equivalently L3027F in ORF 1a
ORF 3a		A33S	188	99	0.51
S	Surface glycoprotein	E654Q	188	29	0.84
nsp14	Exonuclease	V316F	187	50	1.43	Equivalently V6241F in ORF 1ab
nsp15	EndoRNAse	E228K	187	57	1.14	Equivalently E6680K in ORF 1ab
nsp3	ADRP, Papain-like proteinase, transmembrane domain 1	V393F	187	50	1.43	Equivalently V1211F in ORF 1a
S	Surface glycoprotein	T478I	187	89	2.14
nsp3	ADRP, Papain-like proteinase, transmembrane domain 1	P1044S	186	73	0.56	Equivalently P1862S in ORF 1a
ORF 8		I121L	186	5	0.14
E	Envelope protein	V62F	185	50	1.43
nsp3	ADRP, Papain-like proteinase, transmembrane domain 1	T1198I	185	89	2.14	Equivalently T2016I in ORF 1a
ORF 3a		A110V	185	64	1.85
ORF 3a		W193L	185	61	1.73
nsp12	RNA-dependent RNA polymerase	H613Y	183	83	2.27	Equivalently H5005Y in ORF 1ab
nsp13	Zinc-binding domain, NTPase/helicase domain	V193I	183	30	0.85	Equivalently V5517I in ORF 1ab
nsp13	Zinc-binding domain, NTPase/helicase domain	L297P	183	98	2.7	Equivalently L5621P in ORF 1ab
S	Surface glycoprotein	D138H	183	81	1.72
nsp13	Zinc-binding domain, NTPase/helicase domain	S166L	182	144	3.04	Equivalently S5490L in ORF 1ab
nsp2		I513V	182	30	0.85	Equivalently I693V in ORF 1a
nsp3	ADRP, Papain-like proteinase, transmembrane domain 1	G596C	182	158	2.22	Equivalently G1414C in ORF 1a
nsp3	ADRP, Papain-like proteinase, transmembrane domain 1	S1717L	182	144	3.04	Equivalently S2535L in ORF 1a
ORF 3a		E226G	182	98	2.78
S	Surface glycoprotein	I1225F	182	21	0.61
E	Envelope protein	T9I	181	89	2.14
nsp13	Zinc-binding domain, NTPase/helicase domain	V570L	181	32	0.91	Equivalently V5894L in ORF 1ab
nsp14	Exonuclease	A85S	181	99	0.51	Equivalently A6010S in ORF 1ab
nsp3	ADRP, Papain-like proteinase, transmembrane domain 1	P822H	181	76	2.15	Equivalently P1640H in ORF 1a
nsp7		S26F	181	155	3.45	Equivalently S3885F in ORF 1a
ORF 10		R24C	181	180	3.06
ORF 3a		R134L	181	102	2.62
nsp13	Zinc-binding domain, NTPase/helicase domain	H164Y	180	83	2.27	Equivalently H5488Y in ORF 1ab
nsp13	Zinc-binding domain, NTPase/helicase domain	G287V	180	109	2.76	Equivalently G5611V in ORF 1ab
nsp3	ADRP, Papain-like proteinase, transmembrane domain 1	L557F	180	22	0.63	Equivalently L1375F in ORF 1a
nsp3	ADRP, Papain-like proteinase, transmembrane domain 1	S1375F	180	155	3.45	Equivalently S2193F in ORF 1a
nsp3	ADRP, Papain-like proteinase, transmembrane domain 1	D1499Y	180	160	3.95	Equivalently D2317Y in ORF 1a
nsp3	ADRP, Papain-like proteinase, transmembrane domain 1	S1588L	180	144	3.04	Equivalently S2406L in ORF 1a
S	Surface glycoprotein	G75V	180	109	2.76
nsp16	2'-O-ribose methyltransferase	Q238H	179	24	0.32	Equivalently Q7036H in ORF 1ab
nsp3	ADRP, Papain-like proteinase, transmembrane domain 1	S1206L	179	144	3.04	Equivalently S2024L in ORF 1a
S	Surface glycoprotein	T76I	179	89	2.14
nsp2		T170I	178	89	2.14	Equivalently T350I in ORF 1a
nsp2		G262S	178	55	0.85	Equivalently G442S in ORF 1a
nsp3	ADRP, Papain-like proteinase, transmembrane domain 1	T350I	178	89	2.14	Equivalently T1168I in ORF 1a
nsp8	Putative primase	T187I	178	89	2.14	Equivalently T4129I in ORF 1a
ORF 7a		G38V	177	109	2.76
nsp1	Leader protein	L92F	176	22	0.63	Equivalently L92F in ORF 1a
nsp1	Leader protein	N126S	176	46	1.31	Equivalently N126S in ORF 1a
nsp14	Exonuclease	T31I	176	89	2.14	Equivalently T5956I in ORF 1ab
nsp3	ADRP, Papain-like proteinase, transmembrane domain 1	P389L	176	98	2.7	Equivalently P1207L in ORF 1a
ORF 8		W45L	176	61	1.73
S	Surface glycoprotein	V213L	176	32	0.91
nsp12	RNA-dependent RNA polymerase	T293I	175	89	2.14	Equivalently T4685I in ORF 1ab
nsp13	Zinc-binding domain, NTPase/helicase domain	T153I	175	89	2.14	Equivalently T5477I in ORF 1ab
nsp13	Zinc-binding domain, NTPase/helicase domain	V187L	175	32	0.91	Equivalently V5511L in ORF 1ab
nsp3	ADRP, Papain-like proteinase, transmembrane domain 1	D135Y	175	160	3.95	Equivalently D953Y in ORF 1a
S	Surface glycoprotein	V382L	175	32	0.91
S	Surface glycoprotein	T859N	175	65	1.4
N	Nucleocapsid phosphoprotein	R209K	174	26	0.4
N	Nucleocapsid phosphoprotein	T271I	174	89	2.14
nsp1	Leader protein	G133V	174	109	2.76	Equivalently G133V in ORF 1a
nsp14	Exonuclease	M49I	174	10	0.29	Equivalently M5974I in ORF 1ab
nsp14	Exonuclease	I74V	174	30	0.85	Equivalently I5999V in ORF 1ab
nsp6	Putative transmembrane domain	Q208R	174	43	1.13	Equivalently Q3777R in ORF 1a
nsp16	2'-O-ribose methyltransferase	T195I	173	89	2.14	Equivalently T6993I in ORF 1ab
nsp3	ADRP, Papain-like proteinase, transmembrane domain 1	T611I	173	89	2.14	Equivalently T1429I in ORF 1a
nsp3	ADRP, Papain-like proteinase, transmembrane domain 1	A1311V	173	64	1.85	Equivalently A2129V in ORF 1a
nsp3	ADRP, Papain-like proteinase, transmembrane domain 1	P1787S	173	73	0.56	Equivalently P2605S in ORF 1a
nsp8	Putative primase	Q198H	173	24	0.32	Equivalently Q4140H in ORF 1a
ORF 7a		A8T	173	58	0.9
S	Surface glycoprotein	A829T	173	58	0.9
N	Nucleocapsid phosphoprotein	A308S	172	99	0.51
nsp12	RNA-dependent RNA polymerase	M463I	172	10	0.29	Equivalently M4855I in ORF 1ab
nsp3	ADRP, Papain-like proteinase, transmembrane domain 1	D112Y	172	160	3.95	Equivalently D930Y in ORF 1a
S	Surface glycoprotein	R847K	172	26	0.4
N	Nucleocapsid phosphoprotein	M322I	171	10	0.29
N	Nucleocapsid phosphoprotein	S413I	171	142	2.95
nsp13	Zinc-binding domain, NTPase/helicase domain	Y253H	171	83	2.27	Equivalently Y5577H in ORF 1ab
nsp2		T429I	171	89	2.14	Equivalently T609I in ORF 1a
nsp3	ADRP, Papain-like proteinase, transmembrane domain 1	T133I	171	89	2.14	Equivalently T951I in ORF 1a
nsp3	ADRP, Papain-like proteinase, transmembrane domain 1	T1335I	171	89	2.14	Equivalently T2153I in ORF 1a
N	Nucleocapsid phosphoprotein	G212C	170	158	2.22
nsp12	RNA-dependent RNA polymerase	K91R	170	26	0.4	Equivalently K4483R in ORF 1ab
nsp15	EndoRNAse	A171V	170	64	1.85	Equivalently A6623V in ORF 1ab
nsp3	ADRP, Papain-like proteinase, transmembrane domain 1	Y916H	170	83	2.27	Equivalently Y1734H in ORF 1a
nsp4	Transmembrane domain 2	G79V	170	109	2.76	Equivalently G2842V in ORF 1a
ORF 7a		V93F	170	50	1.43
S	Surface glycoprotein	D198G	170	94	2.37
nsp14	Exonuclease	S369F	169	155	3.45	Equivalently S6294F in ORF 1ab
nsp3	ADRP, Papain-like proteinase, transmembrane domain 1	P109L	169	98	2.7	Equivalently P927L in ORF 1a
nsp3	ADRP, Papain-like proteinase, transmembrane domain 1	V238L	169	32	0.91	Equivalently V1056L in ORF 1a
nsp3	ADRP, Papain-like proteinase, transmembrane domain 1	T424I	169	89	2.14	Equivalently T1242I in ORF 1a
nsp3	ADRP, Papain-like proteinase, transmembrane domain 1	H1307Y	169	83	2.27	Equivalently H2125Y in ORF 1a
nsp3	ADRP, Papain-like proteinase, transmembrane domain 1	V1811I	169	30	0.85	Equivalently V2629I in ORF 1a
nsp8	Putative primase	L95F	169	22	0.63	Equivalently L4037F in ORF 1a
S	Surface glycoprotein	T323I	169	89	2.14
nsp10		A104V	168	64	1.85	Equivalently A4357V in ORF 1a
nsp3	ADRP, Papain-like proteinase, transmembrane domain 1	L312F	168	22	0.63	Equivalently L1130F in ORF 1a
nsp3	ADRP, Papain-like proteinase, transmembrane domain 1	H342Y	168	83	2.27	Equivalently H1160Y in ORF 1a
nsp4	Transmembrane domain 2	G196V	168	109	2.76	Equivalently G2959V in ORF 1a
nsp6	Putative transmembrane domain	R5I	168	98	2.49	Equivalently R3574I in ORF 1a
S	Surface glycoprotein	R214L	168	102	2.62
N	Nucleocapsid phosphoprotein	S206F	167	155	3.45
nsp12	RNA-dependent RNA polymerase	M629I	167	10	0.29	Equivalently M5021I in ORF 1ab
nsp13	Zinc-binding domain, NTPase/helicase domain	M233I	167	10	0.29	Equivalently M5557I in ORF 1ab
nsp14	Exonuclease	K304N	167	94	1.84	Equivalently K6229N in ORF 1ab
nsp2		G285V	167	109	2.76	Equivalently G465V in ORF 1a
nsp3	ADRP, Papain-like proteinase, transmembrane domain 1	S660Y	167	143	3.33	Equivalently S1478Y in ORF 1a
nsp3	ADRP, Papain-like proteinase, transmembrane domain 1	D736A	167	126	2.37	Equivalently D1554A in ORF 1a
nsp4	Transmembrane domain 2	T83I	167	89	2.14	Equivalently T2846I in ORF 1a
nsp8	Putative primase	N43H	167	68	1.29	Equivalently N3985H in ORF 1a
ORF 3a		S92L	167	144	3.04
S	Surface glycoprotein	T1117I	167	89	2.14
E	Envelope protein	R69I	166	98	2.49
N	Nucleocapsid phosphoprotein	P168S	166	73	0.56
N	Nucleocapsid phosphoprotein	T366I	166	89	2.14
nsp13	Zinc-binding domain, NTPase/helicase domain	S259L	166	144	3.04	Equivalently S5583L in ORF 1ab
nsp16	2'-O-ribose methyltransferase	Q28K	166	53	1.06	Equivalently Q6826K in ORF 1ab
nsp3	ADRP, Papain-like proteinase, transmembrane domain 1	T1465I	166	89	2.14	Equivalently T2283I in ORF 1a
nsp6	Putative transmembrane domain	Q208H	166	24	0.32	Equivalently Q3777H in ORF 1a
ORF 3a		L106F	166	22	0.63
ORF 8		S69L	166	144	3.04
S	Surface glycoprotein	T22I	166	89	2.14
M	Membrane glycoprotein	V23L	165	32	0.91
N	Nucleocapsid phosphoprotein	G96C	165	158	2.22
nsp3	ADRP, Papain-like proteinase, transmembrane domain 1	P1261S	165	73	0.56	Equivalently P2079S in ORF 1a
nsp9	ssRNA-binding protein	D25G	165	94	2.37	Equivalently D4165G in ORF 1a
ORF 10		Q29*	165	-	-
nsp13	Zinc-binding domain, NTPase/helicase domain	L325F	164	22	0.63	Equivalently L5649F in ORF 1ab
nsp15	EndoRNAse	S287L	164	144	3.04	Equivalently S6739L in ORF 1ab
nsp3	ADRP, Papain-like proteinase, transmembrane domain 1	G1447D	164	94	2.37	Equivalently G2265D in ORF 1a
ORF 7a		H47Y	164	83	2.27
S	Surface glycoprotein	A846S	164	99	0.51
M	Membrane glycoprotein	L17F	163	22	0.63
nsp2		A488V	163	64	1.85	Equivalently A668V in ORF 1a
nsp3	ADRP, Papain-like proteinase, transmembrane domain 1	Q203H	163	24	0.32	Equivalently Q1021H in ORF 1a
S	Surface glycoprotein	S1252F	163	155	3.45
nsp15	EndoRNAse	D39Y	162	160	3.95	Equivalently D6491Y in ORF 1ab
ORF 7b		H42Y	162	83	2.27
S	Surface glycoprotein	E1195Q	162	29	0.84
nsp12	RNA-dependent RNA polymerase	S913L	161	144	3.04	Equivalently S5305L in ORF 1ab
nsp2		A510V	160	64	1.85	Equivalently A690V in ORF 1a
S	Surface glycoprotein	V1104L	160	32	0.91
S	Surface glycoprotein	G1251V	160	109	2.76
nsp16	2'-O-ribose methyltransferase	P236S	159	73	0.56	Equivalently P7034S in ORF 1ab
nsp16	2'-O-ribose methyltransferase	V294I	159	30	0.85	Equivalently V7092I in ORF 1ab
nsp3	ADRP, Papain-like proteinase, transmembrane domain 1	V477F	159	50	1.43	Equivalently V1295F in ORF 1a
nsp13	Zinc-binding domain, NTPase/helicase domain	P77L	158	98	2.7	Equivalently P5401L in ORF 1ab
nsp14	Exonuclease	P393L	158	98	2.7	Equivalently P6318L in ORF 1ab
nsp3	ADRP, Papain-like proteinase, transmembrane domain 1	M829I	158	10	0.29	Equivalently M1647I in ORF 1a
nsp3	ADRP, Papain-like proteinase, transmembrane domain 1	A1179V	158	64	1.85	Equivalently A1997V in ORF 1a
nsp3	ADRP, Papain-like proteinase, transmembrane domain 1	S1682F	158	155	3.45	Equivalently S2500F in ORF 1a
S	Surface glycoprotein	W152C	158	214	3.34
nsp12	RNA-dependent RNA polymerase	E370K	157	57	1.14	Equivalently E4762K in ORF 1ab
nsp14	Exonuclease	T516I	157	89	2.14	Equivalently T6441I in ORF 1ab
nsp2		P624L	157	98	2.7	Equivalently P804L in ORF 1a
nsp3	ADRP, Papain-like proteinase, transmembrane domain 1	I1192T	157	89	2.14	Equivalently I2010T in ORF 1a
nsp6	Putative transmembrane domain	W140C	157	214	3.34	Equivalently W3709C in ORF 1a
S	Surface glycoprotein	E484K	157	57	1.14
nsp13	Zinc-binding domain, NTPase/helicase domain	V49I	156	30	0.85	Equivalently V5373I in ORF 1ab
nsp2		G199E	156	98	2.78	Equivalently G379E in ORF 1a
nsp3	ADRP, Papain-like proteinase, transmembrane domain 1	A1527V	156	64	1.85	Equivalently A2345V in ORF 1a
ORF 3a		G174C	156	158	2.22
S	Surface glycoprotein	P1162S	156	73	0.56
S	Surface glycoprotein	C1235F	156	204	2.24
nsp14	Exonuclease	V182L	155	32	0.91	Equivalently V6107L in ORF 1ab
nsp14	Exonuclease	D345Y	155	160	3.95	Equivalently D6270Y in ORF 1ab
nsp2		D23N	155	23	0.65	Equivalently D203N in ORF 1a
nsp3	ADRP, Papain-like proteinase, transmembrane domain 1	S1265R	155	109	2.74	Equivalently S2083R in ORF 1a
nsp3	ADRP, Papain-like proteinase, transmembrane domain 1	R1449G	155	125	3.58	Equivalently R2267G in ORF 1a
nsp5	3C-like proteinase	L75F	155	22	0.63	Equivalently L3338F in ORF 1a
N	Nucleocapsid phosphoprotein	G25C	154	158	2.22
nsp12	RNA-dependent RNA polymerase	P323F	154	114	3.17	Equivalently P4715F in ORF 1ab
nsp3	ADRP, Papain-like proteinase, transmembrane domain 1	G1255V	154	109	2.76	Equivalently G2073V in ORF 1a
nsp9	ssRNA-binding protein	T109I	154	89	2.14	Equivalently T4249I in ORF 1a
ORF 3a		P240L	154	98	2.7
ORF 8		T87I	154	89	2.14
nsp14	Exonuclease	V405L	153	32	0.91	Equivalently V6330L in ORF 1ab
nsp15	EndoRNAse	S161I	153	142	2.95	Equivalently S6613I in ORF 1ab
nsp3	ADRP, Papain-like proteinase, transmembrane domain 1	L1328F	153	22	0.63	Equivalently L2146F in ORF 1a
nsp3	ADRP, Papain-like proteinase, transmembrane domain 1	A1796V	153	64	1.85	Equivalently A2614V in ORF 1a
nsp3	ADRP, Papain-like proteinase, transmembrane domain 1	K1804N	153	94	1.84	Equivalently K2622N in ORF 1a
ORF 3a		R68I	153	98	2.49
nsp12	RNA-dependent RNA polymerase	V330L	152	32	0.91	Equivalently V4722L in ORF 1ab
nsp13	Zinc-binding domain, NTPase/helicase domain	S350L	152	144	3.04	Equivalently S5674L in ORF 1ab
nsp14	Exonuclease	P140S	152	73	0.56	Equivalently P6065S in ORF 1ab
ORF 3a		F43V	152	50	1.43
ORF 3a		V112F	152	50	1.43
S	Surface glycoprotein	D215G	152	94	2.37
S	Surface glycoprotein	P330S	152	73	0.56
nsp12	RNA-dependent RNA polymerase	T26I	151	89	2.14	Equivalently T4418I in ORF 1ab
nsp3	ADRP, Papain-like proteinase, transmembrane domain 1	S650F	151	155	3.45	Equivalently S1468F in ORF 1a
ORF 3a		S74F	151	155	3.45
nsp3	ADRP, Papain-like proteinase, transmembrane domain 1	P389S	150	73	0.56	Equivalently P1207S in ORF 1a
nsp3	ADRP, Papain-like proteinase, transmembrane domain 1	T1482I	150	89	2.14	Equivalently T2300I in ORF 1a
ORF 7a		Q62*	150	-	-
S	Surface glycoprotein	A846V	150	64	1.85
N	Nucleocapsid phosphoprotein	P6L	149	98	2.7
nsp1	Leader protein	H45Y	149	83	2.27	Equivalently H45Y in ORF 1a
nsp12	RNA-dependent RNA polymerase	T644M	149	81	1.86	Equivalently T5036M in ORF 1ab
nsp13	Zinc-binding domain, NTPase/helicase domain	M576I	149	10	0.29	Equivalently M5900I in ORF 1ab
ORF 8		Q72H	149	24	0.32
S	Surface glycoprotein	A522S	149	99	0.51
nsp3	ADRP, Papain-like proteinase, transmembrane domain 1	Q203R	148	43	1.13	Equivalently Q1021R in ORF 1a
nsp4	Transmembrane domain 2	T73I	148	89	2.14	Equivalently T2836I in ORF 1a
nsp5	3C-like proteinase	A129V	148	64	1.85	Equivalently A3392V in ORF 1a
ORF 3a		G174A	148	60	0.91
ORF 7a		S81P	148	73	0.56
ORF 7b		T40I	148	89	2.14
ORF 6		V24F	147	50	1.43
ORF 8		P36L	147	98	2.7
M	Membrane glycoprotein	H148Q	146	24	0.32
M	Membrane glycoprotein	H155Y	146	83	2.27
nsp1	Leader protein	V60I	146	30	0.85	Equivalently V60I in ORF 1a
nsp3	ADRP, Papain-like proteinase, transmembrane domain 1	G145S	146	55	0.85	Equivalently G963S in ORF 1a
nsp3	ADRP, Papain-like proteinase, transmembrane domain 1	S1054I	146	142	2.95	Equivalently S1872I in ORF 1a
ORF 10		D31Y	146	160	3.95
S	Surface glycoprotein	V308L	146	32	0.91
N	Nucleocapsid phosphoprotein	P326S	145	73	0.56
nsp14	Exonuclease	E204D	145	45	0.9	Equivalently E6129D in ORF 1ab
nsp2		S99F	145	155	3.45	Equivalently S279F in ORF 1a
nsp2		V126F	145	50	1.43	Equivalently V306F in ORF 1a
nsp3	ADRP, Papain-like proteinase, transmembrane domain 1	M1278I	145	10	0.29	Equivalently M2096I in ORF 1a
nsp4	Transmembrane domain 2	T143I	145	89	2.14	Equivalently T2906I in ORF 1a
ORF 3a		A54V	145	64	1.85
S	Surface glycoprotein	V90F	145	50	1.43
nsp14	Exonuclease	R163C	144	180	3.06	Equivalently R6088C in ORF 1ab
nsp3	ADRP, Papain-like proteinase, transmembrane domain 1	K412N	144	94	1.84	Equivalently K1230N in ORF 1a
nsp5	3C-like proteinase	R217S	144	109	2.74	Equivalently R3480S in ORF 1a
nsp7		T81I	144	89	2.14	Equivalently T3940I in ORF 1a
S	Surface glycoprotein	S221L	144	144	3.04
ORF 7a		Q94L	143	112	2.7
S	Surface glycoprotein	A67V	143	64	1.85
S	Surface glycoprotein	V320G	143	109	2.76
S	Surface glycoprotein	S477I	143	142	2.95
S	Surface glycoprotein	S735L	143	144	3.04
N	Nucleocapsid phosphoprotein	P207S	142	73	0.56
nsp12	RNA-dependent RNA polymerase	T262I	142	89	2.14	Equivalently T4654I in ORF 1ab
nsp13	Zinc-binding domain, NTPase/helicase domain	G184V	142	109	2.76	Equivalently G5508V in ORF 1ab
ORF 10		A28V	142	64	1.85
ORF 8		L95F	142	22	0.63
S	Surface glycoprotein	A522V	142	64	1.85
S	Surface glycoprotein	P1162L	142	98	2.7
S	Surface glycoprotein	G1223S	142	55	0.85
N	Nucleocapsid phosphoprotein	P207L	141	98	2.7
nsp10		P84S	141	73	0.56	Equivalently P4337S in ORF 1a
nsp13	Zinc-binding domain, NTPase/helicase domain	V356F	141	50	1.43	Equivalently V5680F in ORF 1ab
nsp14	Exonuclease	A138V	141	64	1.85	Equivalently A6063V in ORF 1ab
nsp15	EndoRNAse	L162F	141	22	0.63	Equivalently L6614F in ORF 1ab
nsp3	ADRP, Papain-like proteinase, transmembrane domain 1	V1768G	141	109	2.76	Equivalently V2586G in ORF 1a
nsp6	Putative transmembrane domain	K8N	141	94	1.84	Equivalently K3577N in ORF 1a
nsp9	ssRNA-binding protein	T77I	141	89	2.14	Equivalently T4217I in ORF 1a
ORF 3a		T32I	141	89	2.14
ORF 3a		L275F	141	22	0.63
ORF 8		S54L	141	144	3.04
ORF 8		E106*	141	-	-
N	Nucleocapsid phosphoprotein	G243C	140	158	2.22
nsp16	2'-O-ribose methyltransferase	D108N	140	23	0.65	Equivalently D6906N in ORF 1ab
nsp3	ADRP, Papain-like proteinase, transmembrane domain 1	Q322H	140	24	0.32	Equivalently Q1140H in ORF 1a
nsp3	ADRP, Papain-like proteinase, transmembrane domain 1	V1795F	140	50	1.43	Equivalently V2613F in ORF 1a
nsp8	Putative primase	A53V	140	64	1.85	Equivalently A3995V in ORF 1a
ORF 3a		I62T	140	89	2.14
ORF 3a		L86F	140	22	0.63
ORF 8		I10T	140	89	2.14
S	Surface glycoprotein	V3G	140	109	2.76
S	Surface glycoprotein	D80A	140	126	2.37
S	Surface glycoprotein	A771S	140	99	0.51
N	Nucleocapsid phosphoprotein	R185C	139	180	3.06
N	Nucleocapsid phosphoprotein	S206P	139	73	0.56
nsp12	RNA-dependent RNA polymerase	G25Y	139	147	4.08	Equivalently G4417Y in ORF 1ab
nsp12	RNA-dependent RNA polymerase	L261*	139	-	-	Equivalently L4653* in ORF 1ab
nsp3	ADRP, Papain-like proteinase, transmembrane domain 1	W838*	139	-	-	Equivalently W1656* in ORF 1a
nsp3	ADRP, Papain-like proteinase, transmembrane domain 1	T1250I	139	89	2.14	Equivalently T2068I in ORF 1a
nsp4	Transmembrane domain 2	A181V	139	64	1.85	Equivalently A2944V in ORF 1a
ORF 3a		V90F	139	50	1.43
ORF 7a		P84S	139	73	0.56
S	Surface glycoprotein	K1191N	139	94	1.84
N	Nucleocapsid phosphoprotein	G212V	138	109	2.76
nsp3	ADRP, Papain-like proteinase, transmembrane domain 1	V267F	138	50	1.43	Equivalently V1085F in ORF 1a
nsp8	Putative primase	P133S	138	73	0.56	Equivalently P4075S in ORF 1a
S	Surface glycoprotein	L216F	138	22	0.63
E	Envelope protein	S55F	137	155	3.45
M	Membrane glycoprotein	I168L	137	5	0.14
nsp14	Exonuclease	P412S	137	73	0.56	Equivalently P6337S in ORF 1ab
nsp16	2'-O-ribose methyltransferase	A188S	137	99	0.51	Equivalently A6986S in ORF 1ab
nsp16	2'-O-ribose methyltransferase	A226S	137	99	0.51	Equivalently A7024S in ORF 1ab
nsp6	Putative transmembrane domain	S106F	137	155	3.45	Equivalently S3675F in ORF 1a
nsp8	Putative primase	T17I	137	89	2.14	Equivalently T3959I in ORF 1a
nsp15	EndoRNAse	T48I	136	89	2.14	Equivalently T6500I in ORF 1ab
N	Nucleocapsid phosphoprotein	P67H	135	76	2.15
nsp12	RNA-dependent RNA polymerase	T85I	135	89	2.14	Equivalently T4477I in ORF 1ab
nsp13	Zinc-binding domain, NTPase/helicase domain	G206C	135	158	2.22	Equivalently G5530C in ORF 1ab
nsp14	Exonuclease	V287F	135	50	1.43	Equivalently V6212F in ORF 1ab
nsp15	EndoRNAse	D128Y	135	160	3.95	Equivalently D6580Y in ORF 1ab
nsp3	ADRP, Papain-like proteinase, transmembrane domain 1	D505Y	135	160	3.95	Equivalently D1323Y in ORF 1a
nsp3	ADRP, Papain-like proteinase, transmembrane domain 1	T725I	135	89	2.14	Equivalently T1543I in ORF 1a
nsp3	ADRP, Papain-like proteinase, transmembrane domain 1	S1406F	135	155	3.45	Equivalently S2224F in ORF 1a
ORF 3a		M125I	135	10	0.29
S	Surface glycoprotein	W258L	135	61	1.73
nsp2		L578V	134	32	0.91	Equivalently L758V in ORF 1a
nsp3	ADRP, Papain-like proteinase, transmembrane domain 1	V245I	134	30	0.85	Equivalently V1063I in ORF 1a
nsp3	ADRP, Papain-like proteinase, transmembrane domain 1	W1509C	134	214	3.34	Equivalently W2327C in ORF 1a
S	Surface glycoprotein	S494P	134	73	0.56
nsp3	ADRP, Papain-like proteinase, transmembrane domain 1	T1288I	133	89	2.14	Equivalently T2106I in ORF 1a
nsp4	Transmembrane domain 2	S432G	133	55	0.85	Equivalently S3195G in ORF 1a
nsp6	Putative transmembrane domain	M83I	133	10	0.29	Equivalently M3652I in ORF 1a
S	Surface glycoprotein	T732A	133	58	0.9
N	Nucleocapsid phosphoprotein	P344S	132	73	0.56
nsp12	RNA-dependent RNA polymerase	V587L	132	32	0.91	Equivalently V4979L in ORF 1ab
nsp2		K500N	132	94	1.84	Equivalently K680N in ORF 1a
ORF 3a		V55F	132	50	1.43
S	Surface glycoprotein	V6F	132	50	1.43
S	Surface glycoprotein	Q218H	132	24	0.32
N	Nucleocapsid phosphoprotein	S190G	131	55	0.85
nsp12	RNA-dependent RNA polymerase	K59N	131	94	1.84	Equivalently K4451N in ORF 1ab
nsp13	Zinc-binding domain, NTPase/helicase domain	S38L	131	144	3.04	Equivalently S5362L in ORF 1ab
nsp15	EndoRNAse	T112I	131	89	2.14	Equivalently T6564I in ORF 1ab
nsp15	EndoRNAse	A231V	131	64	1.85	Equivalently A6683V in ORF 1ab
nsp2		K618N	131	94	1.84	Equivalently K798N in ORF 1a
nsp3	ADRP, Papain-like proteinase, transmembrane domain 1	T73I	131	89	2.14	Equivalently T891I in ORF 1a
nsp3	ADRP, Papain-like proteinase, transmembrane domain 1	T720I	131	89	2.14	Equivalently T1538I in ORF 1a
nsp4	Transmembrane domain 2	V180I	131	30	0.85	Equivalently V2943I in ORF 1a
nsp5	3C-like proteinase	G15C	131	158	2.22	Equivalently G3278C in ORF 1a
nsp5	3C-like proteinase	L67F	131	22	0.63	Equivalently L3330F in ORF 1a
nsp12	RNA-dependent RNA polymerase	P264S	130	73	0.56	Equivalently P4656S in ORF 1ab
nsp14	Exonuclease	H455Y	130	83	2.27	Equivalently H6380Y in ORF 1ab
nsp3	ADRP, Papain-like proteinase, transmembrane domain 1	Q966H	130	24	0.32	Equivalently Q1784H in ORF 1a
nsp4	Transmembrane domain 2	H31Y	130	83	2.27	Equivalently H2794Y in ORF 1a
nsp5	3C-like proteinase	T196M	130	81	1.86	Equivalently T3459M in ORF 1a
S	Surface glycoprotein	T307I	130	89	2.14
S	Surface glycoprotein	V367F	130	50	1.43
nsp2		N87K	129	94	1.84	Equivalently N267K in ORF 1a
nsp2		A411V	129	64	1.85	Equivalently A591V in ORF 1a
nsp3	ADRP, Papain-like proteinase, transmembrane domain 1	T1303I	129	89	2.14	Equivalently T2121I in ORF 1a
nsp4	Transmembrane domain 2	C384F	129	204	2.24	Equivalently C3147F in ORF 1a
nsp9	ssRNA-binding protein	T24I	129	89	2.14	Equivalently T4164I in ORF 1a
ORF 7a		R89W	129	101	2.72
S	Surface glycoprotein	G1085A	129	60	0.91
S	Surface glycoprotein	F1121L	129	22	0.63
nsp14	Exonuclease	L409F	128	22	0.63	Equivalently L6334F in ORF 1ab
nsp3	ADRP, Papain-like proteinase, transmembrane domain 1	E812D	128	45	0.9	Equivalently E1630D in ORF 1a
nsp3	ADRP, Papain-like proteinase, transmembrane domain 1	E1270G	128	98	2.78	Equivalently E2088G in ORF 1a
nsp5	3C-like proteinase	S254F	128	155	3.45	Equivalently S3517F in ORF 1a
ORF 3a		K67N	128	94	1.84
ORF 3a		L95F	128	22	0.63
S	Surface glycoprotein	N1187Y	128	142	3.42
nsp12	RNA-dependent RNA polymerase	A690D	127	126	2.37	Equivalently A5082D in ORF 1ab
nsp2		V485I	127	30	0.85	Equivalently V665I in ORF 1a
nsp3	ADRP, Papain-like proteinase, transmembrane domain 1	G307C	127	158	2.22	Equivalently G1125C in ORF 1a
nsp3	ADRP, Papain-like proteinase, transmembrane domain 1	M494I	127	10	0.29	Equivalently M1312I in ORF 1a
nsp4	Transmembrane domain 2	A22T	127	58	0.9	Equivalently A2785T in ORF 1a
nsp13	Zinc-binding domain, NTPase/helicase domain	S80G	126	55	0.85	Equivalently S5404G in ORF 1ab
nsp13	Zinc-binding domain, NTPase/helicase domain	A368V	126	64	1.85	Equivalently A5692V in ORF 1ab
nsp15	EndoRNAse	S312F	126	155	3.45	Equivalently S6764F in ORF 1ab
nsp16	2'-O-ribose methyltransferase	M17I	126	10	0.29	Equivalently M6815I in ORF 1ab
ORF 3a		V88L	126	32	0.91
M	Membrane glycoprotein	M109I	125	10	0.29
nsp12	RNA-dependent RNA polymerase	E922D	125	45	0.9	Equivalently E5314D in ORF 1ab
nsp14	Exonuclease	W86C	125	214	3.34	Equivalently W6011C in ORF 1ab
nsp15	EndoRNAse	M218I	125	10	0.29	Equivalently M6670I in ORF 1ab
nsp2		G115C	125	158	2.22	Equivalently G295C in ORF 1a
nsp2		P181S	125	73	0.56	Equivalently P361S in ORF 1a
nsp2		G220S	125	55	0.85	Equivalently G400S in ORF 1a
nsp3	ADRP, Papain-like proteinase, transmembrane domain 1	T1275I	125	89	2.14	Equivalently T2093I in ORF 1a
ORF 7a		P99S	125	73	0.56
S	Surface glycoprotein	R102I	125	98	2.49
M	Membrane glycoprotein	A69S	124	99	0.51
N	Nucleocapsid phosphoprotein	T141I	124	89	2.14
nsp12	RNA-dependent RNA polymerase	M380I	124	10	0.29	Equivalently M4772I in ORF 1ab
nsp12	RNA-dependent RNA polymerase	P918S	124	73	0.56	Equivalently P5310S in ORF 1ab
nsp13	Zinc-binding domain, NTPase/helicase domain	G206V	124	109	2.76	Equivalently G5530V in ORF 1ab
nsp13	Zinc-binding domain, NTPase/helicase domain	P300L	124	98	2.7	Equivalently P5624L in ORF 1ab
nsp14	Exonuclease	N116D	124	23	0.65	Equivalently N6041D in ORF 1ab
nsp15	EndoRNAse	V186F	124	50	1.43	Equivalently V6638F in ORF 1ab
nsp15	EndoRNAse	D219Y	124	160	3.95	Equivalently D6671Y in ORF 1ab
nsp2		R222C	124	180	3.06	Equivalently R402C in ORF 1a
nsp3	ADRP, Papain-like proteinase, transmembrane domain 1	E493G	124	98	2.78	Equivalently E1311G in ORF 1a
nsp3	ADRP, Papain-like proteinase, transmembrane domain 1	G1043V	124	109	2.76	Equivalently G1861V in ORF 1a
ORF 10		*39Q	124	-	-
ORF 3a		L129F	124	22	0.63
ORF 7a		S83L	124	144	3.04
S	Surface glycoprotein	A1020V	124	64	1.85
nsp13	Zinc-binding domain, NTPase/helicase domain	D204Y	123	160	3.95	Equivalently D5528Y in ORF 1ab
nsp3	ADRP, Papain-like proteinase, transmembrane domain 1	K1241R	123	26	0.4	Equivalently K2059R in ORF 1a
nsp6	Putative transmembrane domain	A79V	123	64	1.85	Equivalently A3648V in ORF 1a
ORF 10		R20I	123	98	2.49
ORF 3a		L147F	123	22	0.63
S	Surface glycoprotein	P1069S	123	73	0.56
N	Nucleocapsid phosphoprotein	T198I	122	89	2.14
nsp12	RNA-dependent RNA polymerase	R173C	122	180	3.06	Equivalently R4565C in ORF 1ab
nsp12	RNA-dependent RNA polymerase	W916C	122	214	3.34	Equivalently W5308C in ORF 1ab
nsp13	Zinc-binding domain, NTPase/helicase domain	M274I	122	10	0.29	Equivalently M5598I in ORF 1ab
nsp14	Exonuclease	G37V	122	109	2.76	Equivalently G5962V in ORF 1ab
nsp2		P13L	122	98	2.7	Equivalently P193L in ORF 1a
nsp2		S248G	122	55	0.85	Equivalently S428G in ORF 1a
nsp3	ADRP, Papain-like proteinase, transmembrane domain 1	L846F	122	22	0.63	Equivalently L1664F in ORF 1a
nsp6	Putative transmembrane domain	M100I	122	10	0.29	Equivalently M3669I in ORF 1a
ORF 3a		G18V	122	109	2.76
ORF 8		P38S	122	73	0.56
S	Surface glycoprotein	G842V	122	109	2.76
N	Nucleocapsid phosphoprotein	K373N	121	94	1.84
nsp3	ADRP, Papain-like proteinase, transmembrane domain 1	K1679N	121	94	1.84	Equivalently K2497N in ORF 1a
nsp5	3C-like proteinase	F8I	121	21	0.61	Equivalently F3271I in ORF 1a
ORF 7b		E3*	121	-	-
S	Surface glycoprotein	G181V	121	109	2.76
nsp16	2'-O-ribose methyltransferase	N298L	120	152	3.49	Equivalently N7096L in ORF 1ab
nsp4	Transmembrane domain 2	L353F	120	22	0.63	Equivalently L3116F in ORF 1a
N	Nucleocapsid phosphoprotein	A35V	119	64	1.85
N	Nucleocapsid phosphoprotein	D81Y	119	160	3.95
N	Nucleocapsid phosphoprotein	D144H	119	81	1.72
nsp13	Zinc-binding domain, NTPase/helicase domain	A4V	119	64	1.85	Equivalently A5328V in ORF 1ab
nsp15	EndoRNAse	T325I	119	89	2.14	Equivalently T6777I in ORF 1ab
nsp16	2'-O-ribose methyltransferase	R216S	119	109	2.74	Equivalently R7014S in ORF 1ab
nsp3	ADRP, Papain-like proteinase, transmembrane domain 1	P395L	119	98	2.7	Equivalently P1213L in ORF 1a
nsp3	ADRP, Papain-like proteinase, transmembrane domain 1	K1382N	119	94	1.84	Equivalently K2200N in ORF 1a
nsp3	ADRP, Papain-like proteinase, transmembrane domain 1	S1396A	119	99	0.51	Equivalently S2214A in ORF 1a
nsp3	ADRP, Papain-like proteinase, transmembrane domain 1	L1870F	119	22	0.63	Equivalently L2688F in ORF 1a
nsp4	Transmembrane domain 2	L360F	119	22	0.63	Equivalently L3123F in ORF 1a
nsp5	3C-like proteinase	L50F	119	22	0.63	Equivalently L3313F in ORF 1a
ORF 8		K68*	119	-	-
S	Surface glycoprotein	A67S	119	99	0.51
S	Surface glycoprotein	K417N	119	94	1.84
S	Surface glycoprotein	A930V	119	64	1.85
S	Surface glycoprotein	M1229T	119	81	1.86
N	Nucleocapsid phosphoprotein	A273S	118	99	0.51
nsp12	RNA-dependent RNA polymerase	L366F	118	22	0.63	Equivalently L4758F in ORF 1ab
nsp13	Zinc-binding domain, NTPase/helicase domain	A316T	118	58	0.9	Equivalently A5640T in ORF 1ab
nsp15	EndoRNAse	A117T	118	58	0.9	Equivalently A6569T in ORF 1ab
nsp16	2'-O-ribose methyltransferase	A116V	118	64	1.85	Equivalently A6914V in ORF 1ab
nsp3	ADRP, Papain-like proteinase, transmembrane domain 1	L142W	118	61	1.73	Equivalently L960W in ORF 1a
nsp3	ADRP, Papain-like proteinase, transmembrane domain 1	D178Y	118	160	3.95	Equivalently D996Y in ORF 1a
nsp3	ADRP, Papain-like proteinase, transmembrane domain 1	A225V	118	64	1.85	Equivalently A1043V in ORF 1a
nsp3	ADRP, Papain-like proteinase, transmembrane domain 1	A1766V	118	64	1.85	Equivalently A2584V in ORF 1a
ORF 7b		E39*	118	-	-
N	Nucleocapsid phosphoprotein	A251V	117	64	1.85
nsp15	EndoRNAse	I222S	117	142	2.95	Equivalently I6674S in ORF 1ab
nsp2		T528I	117	89	2.14	Equivalently T708I in ORF 1a
nsp5	3C-like proteinase	G71V	117	109	2.76	Equivalently G3334V in ORF 1a
ORF 3a		Y107H	117	83	2.27
N	Nucleocapsid phosphoprotein	G18V	116	109	2.76
N	Nucleocapsid phosphoprotein	G30R	116	125	3.58
nsp16	2'-O-ribose methyltransferase	L163H	116	99	2.59	Equivalently L6961H in ORF 1ab
nsp2		A192V	116	64	1.85	Equivalently A372V in ORF 1a
nsp3	ADRP, Papain-like proteinase, transmembrane domain 1	D164G	116	94	2.37	Equivalently D982G in ORF 1a
nsp3	ADRP, Papain-like proteinase, transmembrane domain 1	S692F	116	155	3.45	Equivalently S1510F in ORF 1a
nsp3	ADRP, Papain-like proteinase, transmembrane domain 1	N1587S	116	46	1.31	Equivalently N2405S in ORF 1a
nsp9	ssRNA-binding protein	T19I	116	89	2.14	Equivalently T4159I in ORF 1a
nsp9	ssRNA-binding protein	T67I	116	89	2.14	Equivalently T4207I in ORF 1a
S	Surface glycoprotein	P479S	116	73	0.56
nsp12	RNA-dependent RNA polymerase	D879Y	115	160	3.95	Equivalently D5271Y in ORF 1ab
nsp2		S32L	115	144	3.04	Equivalently S212L in ORF 1a
nsp2		T256I	115	89	2.14	Equivalently T436I in ORF 1a
nsp3	ADRP, Papain-like proteinase, transmembrane domain 1	A496V	115	64	1.85	Equivalently A1314V in ORF 1a
nsp4	Transmembrane domain 2	D217G	115	94	2.37	Equivalently D2980G in ORF 1a
nsp8	Putative primase	S41F	115	155	3.45	Equivalently S3983F in ORF 1a
ORF 8		T11I	115	89	2.14
ORF 8		A65T	115	58	0.9
N	Nucleocapsid phosphoprotein	A156S	114	99	0.51
nsp13	Zinc-binding domain, NTPase/helicase domain	T239I	114	89	2.14	Equivalently T5563I in ORF 1ab
nsp14	Exonuclease	P46L	114	98	2.7	Equivalently P5971L in ORF 1ab
nsp2		T223I	114	89	2.14	Equivalently T403I in ORF 1a
nsp2		G262V	114	109	2.76	Equivalently G442V in ORF 1a
nsp2		G526C	114	158	2.22	Equivalently G706C in ORF 1a
nsp3	ADRP, Papain-like proteinase, transmembrane domain 1	E391D	114	45	0.9	Equivalently E1209D in ORF 1a
nsp3	ADRP, Papain-like proteinase, transmembrane domain 1	C1362F	114	204	2.24	Equivalently C2180F in ORF 1a
ORF 3a		S177I	114	142	2.95
ORF 7a		A105V	114	64	1.85
ORF 7a		E121V	114	121	2.97
N	Nucleocapsid phosphoprotein	S206L	113	144	3.04
N	Nucleocapsid phosphoprotein	V270L	113	32	0.91
nsp1	Leader protein	G7V	113	109	2.76	Equivalently G7V in ORF 1a
nsp13	Zinc-binding domain, NTPase/helicase domain	S74L	113	144	3.04	Equivalently S5398L in ORF 1ab
nsp16	2'-O-ribose methyltransferase	T140I	113	89	2.14	Equivalently T6938I in ORF 1ab
nsp2		M405V	113	22	0.62	Equivalently M585V in ORF 1a
nsp3	ADRP, Papain-like proteinase, transmembrane domain 1	M768I	113	10	0.29	Equivalently M1586I in ORF 1a
ORF 10		T12M	113	81	1.86
nsp10		V57F	112	50	1.43	Equivalently V4310F in ORF 1a
nsp15	EndoRNAse	P262L	112	98	2.7	Equivalently P6714L in ORF 1ab
nsp2		P17S	112	73	0.56	Equivalently P197S in ORF 1a
nsp3	ADRP, Papain-like proteinase, transmembrane domain 1	R30K	112	26	0.4	Equivalently R848K in ORF 1a
nsp3	ADRP, Papain-like proteinase, transmembrane domain 1	L1304F	112	22	0.63	Equivalently L2122F in ORF 1a
nsp4	Transmembrane domain 2	A48S	112	99	0.51	Equivalently A2811S in ORF 1a
ORF 3a		S58I	112	142	2.95
ORF 3a		G174D	112	94	2.37
ORF 3a		L219F	112	22	0.63
ORF 8		I39T	112	89	2.14
N	Nucleocapsid phosphoprotein	T166I	111	89	2.14
nsp2		A302V	111	64	1.85	Equivalently A482V in ORF 1a
nsp3	ADRP, Papain-like proteinase, transmembrane domain 1	I385T	111	89	2.14	Equivalently I1203T in ORF 1a
N	Nucleocapsid phosphoprotein	I84V	110	30	0.85
nsp12	RNA-dependent RNA polymerase	K478N	110	94	1.84	Equivalently K4870N in ORF 1ab
nsp14	Exonuclease	L493F	110	22	0.63	Equivalently L6418F in ORF 1ab
nsp15	EndoRNAse	D212G	110	94	2.37	Equivalently D6664G in ORF 1ab
nsp2		K112N	110	94	1.84	Equivalently K292N in ORF 1a
nsp2		G228V	110	109	2.76	Equivalently G408V in ORF 1a
nsp2		A385V	110	64	1.85	Equivalently A565V in ORF 1a
nsp3	ADRP, Papain-like proteinase, transmembrane domain 1	L689F	110	22	0.63	Equivalently L1507F in ORF 1a
nsp3	ADRP, Papain-like proteinase, transmembrane domain 1	S1212L	110	144	3.04	Equivalently S2030L in ORF 1a
nsp4	Transmembrane domain 2	A149S	110	99	0.51	Equivalently A2912S in ORF 1a
nsp8	Putative primase	R51H	110	29	0.82	Equivalently R3993H in ORF 1a
ORF 3a		A103T	110	58	0.9
nsp10		P59T	109	38	0.87	Equivalently P4312T in ORF 1a
nsp3	ADRP, Papain-like proteinase, transmembrane domain 1	D174Y	109	160	3.95	Equivalently D992Y in ORF 1a
nsp3	ADRP, Papain-like proteinase, transmembrane domain 1	V473F	109	50	1.43	Equivalently V1291F in ORF 1a
nsp3	ADRP, Papain-like proteinase, transmembrane domain 1	L1035F	109	22	0.63	Equivalently L1853F in ORF 1a
nsp9	ssRNA-binding protein	G37V	109	109	2.76	Equivalently G4177V in ORF 1a
ORF 3a		D22Y	109	160	3.95
ORF 7b		L4F	109	22	0.63
S	Surface glycoprotein	Y28H	109	83	2.27
N	Nucleocapsid phosphoprotein	R203M	108	92	2.29
N	Nucleocapsid phosphoprotein	P364L	108	98	2.7
nsp15	EndoRNAse	M218T	108	81	1.86	Equivalently M6670T in ORF 1ab
nsp3	ADRP, Papain-like proteinase, transmembrane domain 1	P679L	108	98	2.7	Equivalently P1497L in ORF 1a
nsp3	ADRP, Papain-like proteinase, transmembrane domain 1	T942I	108	89	2.14	Equivalently T1760I in ORF 1a
nsp3	ADRP, Papain-like proteinase, transmembrane domain 1	G1433V	108	109	2.76	Equivalently G2251V in ORF 1a
ORF 3a		L140F	108	22	0.63
S	Surface glycoprotein	H69Y	108	83	2.27
S	Surface glycoprotein	D215Y	108	160	3.95
nsp12	RNA-dependent RNA polymerase	T801N	107	65	1.4	Equivalently T5193N in ORF 1ab
nsp14	Exonuclease	V167L	107	32	0.91	Equivalently V6092L in ORF 1ab
nsp15	EndoRNAse	A171T	107	58	0.9	Equivalently A6623T in ORF 1ab
nsp16	2'-O-ribose methyltransferase	G208V	107	109	2.76	Equivalently G7006V in ORF 1ab
nsp2		T434I	107	89	2.14	Equivalently T614I in ORF 1a
nsp3	ADRP, Papain-like proteinase, transmembrane domain 1	T1677I	107	89	2.14	Equivalently T2495I in ORF 1a
nsp3	ADRP, Papain-like proteinase, transmembrane domain 1	V1786I	107	30	0.85	Equivalently V2604I in ORF 1a
ORF 3a		K61N	107	94	1.84
ORF 7a		P34L	107	98	2.7
ORF 8		C102F	107	204	2.24
nsp13	Zinc-binding domain, NTPase/helicase domain	S301P	106	73	0.56	Equivalently S5625P in ORF 1ab
nsp14	Exonuclease	Y420F	106	22	0.48	Equivalently Y6345F in ORF 1ab
nsp2		I251M	106	10	0.29	Equivalently I431M in ORF 1a
nsp2		G392E	106	98	2.78	Equivalently G572E in ORF 1a
nsp3	ADRP, Papain-like proteinase, transmembrane domain 1	V1209L	106	32	0.91	Equivalently V2027L in ORF 1a
S	Surface glycoprotein	T51I	106	89	2.14
S	Surface glycoprotein	C1247F	106	204	2.24
nsp1	Leader protein	D75G	105	94	2.37	Equivalently D75G in ORF 1a
nsp12	RNA-dependent RNA polymerase	E436G	105	98	2.78	Equivalently E4828G in ORF 1ab
nsp14	Exonuclease	V125F	105	50	1.43	Equivalently V6050F in ORF 1ab
nsp15	EndoRNAse	K12N	105	94	1.84	Equivalently K6464N in ORF 1ab
nsp2		P624S	105	73	0.56	Equivalently P804S in ORF 1a
nsp3	ADRP, Papain-like proteinase, transmembrane domain 1	D729Y	105	160	3.95	Equivalently D1547Y in ORF 1a
nsp3	ADRP, Papain-like proteinase, transmembrane domain 1	K945N	105	94	1.84	Equivalently K1763N in ORF 1a
nsp7		K70N	105	94	1.84	Equivalently K3929N in ORF 1a
ORF 3a		G254*	105	-	-
nsp12	RNA-dependent RNA polymerase	V354L	104	32	0.91	Equivalently V4746L in ORF 1ab
nsp13	Zinc-binding domain, NTPase/helicase domain	V479F	104	50	1.43	Equivalently V5803F in ORF 1ab
nsp13	Zinc-binding domain, NTPase/helicase domain	K524N	104	94	1.84	Equivalently K5848N in ORF 1ab
nsp2		C509G	104	158	2.22	Equivalently C689G in ORF 1a
nsp3	ADRP, Papain-like proteinase, transmembrane domain 1	S371N	104	46	1.31	Equivalently S1189N in ORF 1a
nsp3	ADRP, Papain-like proteinase, transmembrane domain 1	A1321V	104	64	1.85	Equivalently A2139V in ORF 1a
nsp4	Transmembrane domain 2	F17L	104	22	0.63	Equivalently F2780L in ORF 1a
nsp4	Transmembrane domain 2	V498I	104	30	0.85	Equivalently V3261I in ORF 1a
ORF 3a		A143T	104	58	0.9
S	Surface glycoprotein	E96D	104	45	0.9
nsp12	RNA-dependent RNA polymerase	N491S	103	46	1.31	Equivalently N4883S in ORF 1ab
nsp14	Exonuclease	M315I	103	10	0.29	Equivalently M6240I in ORF 1ab
nsp16	2'-O-ribose methyltransferase	P236L	103	98	2.7	Equivalently P7034L in ORF 1ab
nsp2		V157F	103	50	1.43	Equivalently V337F in ORF 1a
nsp2		Q275H	103	24	0.32	Equivalently Q455H in ORF 1a
nsp2		V447F	103	50	1.43	Equivalently V627F in ORF 1a
nsp2		G481V	103	109	2.76	Equivalently G661V in ORF 1a
nsp7		N78S	103	46	1.31	Equivalently N3937S in ORF 1a
ORF 3a		S26L	103	144	3.04
ORF 8		G8R	103	125	3.58
ORF 8		S67Y	103	143	3.33
S	Surface glycoprotein	N30H	103	68	1.29
S	Surface glycoprotein	M177I	103	10	0.29
S	Surface glycoprotein	T778I	103	89	2.14
nsp1	Leader protein	L27F	102	22	0.63	Equivalently L27F in ORF 1a
nsp13	Zinc-binding domain, NTPase/helicase domain	Q281R	102	43	1.13	Equivalently Q5605R in ORF 1ab
nsp2		D144G	102	94	2.37	Equivalently D324G in ORF 1a
nsp2		C253R	102	180	3.06	Equivalently C433R in ORF 1a
nsp2		Q346H	102	24	0.32	Equivalently Q526H in ORF 1a
nsp3	ADRP, Papain-like proteinase, transmembrane domain 1	G826V	102	109	2.76	Equivalently G1644V in ORF 1a
nsp5	3C-like proteinase	A70T	102	58	0.9	Equivalently A3333T in ORF 1a
ORF 6		D61Y	102	160	3.95
ORF 8		S21N	102	46	1.31
S	Surface glycoprotein	A647S	102	99	0.51
E	Envelope protein	F20L	101	22	0.63
nsp15	EndoRNAse	V317F	101	50	1.43	Equivalently V6769F in ORF 1ab
nsp16	2'-O-ribose methyltransferase	T91M	101	81	1.86	Equivalently T6889M in ORF 1ab
nsp16	2'-O-ribose methyltransferase	G213C	101	158	2.22	Equivalently G7011C in ORF 1ab
nsp2		Y2H	101	83	2.27	Equivalently Y182H in ORF 1a
nsp3	ADRP, Papain-like proteinase, transmembrane domain 1	E92K	101	57	1.14	Equivalently E910K in ORF 1a
nsp3	ADRP, Papain-like proteinase, transmembrane domain 1	D1115A	101	126	2.37	Equivalently D1933A in ORF 1a
nsp3	ADRP, Papain-like proteinase, transmembrane domain 1	A1279V	101	64	1.85	Equivalently A2097V in ORF 1a
ORF 3a		A39T	101	58	0.9
S	Surface glycoprotein	S940F	101	155	3.45
S	Surface glycoprotein	E1144Q	101	29	0.84
E	Envelope protein	L21F	100	22	0.63
M	Membrane glycoprotein	V66L	100	32	0.91
N	Nucleocapsid phosphoprotein	T24I	100	89	2.14
N	Nucleocapsid phosphoprotein	S37P	100	73	0.56
nsp10		P136S	100	73	0.56	Equivalently P4389S in ORF 1a
nsp12	RNA-dependent RNA polymerase	T908I	100	89	2.14	Equivalently T5300I in ORF 1ab
nsp14	Exonuclease	A225V	100	64	1.85	Equivalently A6150V in ORF 1ab
nsp3	ADRP, Papain-like proteinase, transmembrane domain 1	T703I	100	89	2.14	Equivalently T1521I in ORF 1a
nsp6	Putative transmembrane domain	L125F	100	22	0.63	Equivalently L3694F in ORF 1a
nsp6	Putative transmembrane domain	K263N	100	94	1.84	Equivalently K3832N in ORF 1a
ORF 3a		G254V	100	109	2.76
ORF 8		E106Q	100	29	0.84
S	Surface glycoprotein	K558N	100	94	1.84
S	Surface glycoprotein	G594V	100	109	2.76
S	Surface glycoprotein	Q1208H	100	24	0.32
E	Envelope protein	V49L	99	32	0.91
N	Nucleocapsid phosphoprotein	R191L	99	102	2.62
N	Nucleocapsid phosphoprotein	E378Q	99	29	0.84
nsp14	Exonuclease	G481C	99	158	2.22	Equivalently G6406C in ORF 1ab
nsp15	EndoRNAse	S261L	99	144	3.04	Equivalently S6713L in ORF 1ab
nsp3	ADRP, Papain-like proteinase, transmembrane domain 1	H290Y	99	83	2.27	Equivalently H1108Y in ORF 1a
nsp3	ADRP, Papain-like proteinase, transmembrane domain 1	Q995H	99	24	0.32	Equivalently Q1813H in ORF 1a
ORF 10		I4V	99	30	0.85
ORF 3a		D199Y	99	160	3.95
S	Surface glycoprotein	I197V	99	30	0.85
S	Surface glycoprotein	P681L	99	98	2.7
S	Surface glycoprotein	I870V	99	30	0.85
N	Nucleocapsid phosphoprotein	P142S	98	73	0.56
nsp10		T12I	98	89	2.14	Equivalently T4265I in ORF 1a
nsp13	Zinc-binding domain, NTPase/helicase domain	V169I	98	30	0.85	Equivalently V5493I in ORF 1ab
nsp13	Zinc-binding domain, NTPase/helicase domain	T214I	98	89	2.14	Equivalently T5538I in ORF 1ab
nsp2		I188T	98	89	2.14	Equivalently I368T in ORF 1a
nsp3	ADRP, Papain-like proteinase, transmembrane domain 1	P153S	98	73	0.56	Equivalently P971S in ORF 1a
nsp3	ADRP, Papain-like proteinase, transmembrane domain 1	S1813F	98	155	3.45	Equivalently S2631F in ORF 1a
ORF 3a		E239D	98	45	0.9
S	Surface glycoprotein	A706V	98	64	1.85
S	Surface glycoprotein	A1087S	98	99	0.51
N	Nucleocapsid phosphoprotein	G243V	97	109	2.76
nsp1	Leader protein	L107F	97	22	0.63	Equivalently L107F in ORF 1a
nsp12	RNA-dependent RNA polymerase	T248I	97	89	2.14	Equivalently T4640I in ORF 1ab
nsp15	EndoRNAse	A255V	97	64	1.85	Equivalently A6707V in ORF 1ab
nsp16	2'-O-ribose methyltransferase	G113C	97	158	2.22	Equivalently G6911C in ORF 1ab
nsp3	ADRP, Papain-like proteinase, transmembrane domain 1	I31V	97	30	0.85	Equivalently I849V in ORF 1a
nsp3	ADRP, Papain-like proteinase, transmembrane domain 1	M84V	97	22	0.62	Equivalently M902V in ORF 1a
nsp3	ADRP, Papain-like proteinase, transmembrane domain 1	P389H	97	76	2.15	Equivalently P1207H in ORF 1a
nsp3	ADRP, Papain-like proteinase, transmembrane domain 1	R712I	97	98	2.49	Equivalently R1530I in ORF 1a
nsp3	ADRP, Papain-like proteinase, transmembrane domain 1	L738I	97	5	0.14	Equivalently L1556I in ORF 1a
nsp3	ADRP, Papain-like proteinase, transmembrane domain 1	K999N	97	94	1.84	Equivalently K1817N in ORF 1a
nsp3	ADRP, Papain-like proteinase, transmembrane domain 1	A1769V	97	64	1.85	Equivalently A2587V in ORF 1a
ORF 10		L37F	97	22	0.63
ORF 3a		A103S	97	99	0.51
ORF 3a		F207L	97	22	0.63
ORF 7a		P84L	97	98	2.7
nsp12	RNA-dependent RNA polymerase	L514F	96	22	0.63	Equivalently L4906F in ORF 1ab
nsp3	ADRP, Papain-like proteinase, transmembrane domain 1	L72F	96	22	0.63	Equivalently L890F in ORF 1a
nsp3	ADRP, Papain-like proteinase, transmembrane domain 1	L313F	96	22	0.63	Equivalently L1131F in ORF 1a
nsp3	ADRP, Papain-like proteinase, transmembrane domain 1	V1253F	96	50	1.43	Equivalently V2071F in ORF 1a
ORF 3a		I20T	96	89	2.14
ORF 7a		L116F	96	22	0.63
S	Surface glycoprotein	E583Q	96	29	0.84
S	Surface glycoprotein	R765C	96	180	3.06
N	Nucleocapsid phosphoprotein	R14L	95	102	2.62
N	Nucleocapsid phosphoprotein	A90S	95	99	0.51
nsp12	RNA-dependent RNA polymerase	G823D	95	94	2.37	Equivalently G5215D in ORF 1ab
nsp2		W450R	95	101	2.72	Equivalently W630R in ORF 1a
nsp3	ADRP, Papain-like proteinase, transmembrane domain 1	T656I	95	89	2.14	Equivalently T1474I in ORF 1a
nsp3	ADRP, Papain-like proteinase, transmembrane domain 1	H1841Y	95	83	2.27	Equivalently H2659Y in ORF 1a
nsp5	3C-like proteinase	V261F	95	50	1.43	Equivalently V3524F in ORF 1a
nsp8	Putative primase	T89I	95	89	2.14	Equivalently T4031I in ORF 1a
S	Surface glycoprotein	A845V	95	64	1.85
N	Nucleocapsid phosphoprotein	D128N	94	23	0.65
nsp13	Zinc-binding domain, NTPase/helicase domain	S236I	94	142	2.95	Equivalently S5560I in ORF 1ab
nsp13	Zinc-binding domain, NTPase/helicase domain	A296T	94	58	0.9	Equivalently A5620T in ORF 1ab
nsp14	Exonuclease	V120A	94	64	1.85	Equivalently V6045A in ORF 1ab
nsp14	Exonuclease	V182I	94	30	0.85	Equivalently V6107I in ORF 1ab
nsp14	Exonuclease	K311N	94	94	1.84	Equivalently K6236N in ORF 1ab
nsp14	Exonuclease	P443S	94	73	0.56	Equivalently P6368S in ORF 1ab
nsp3	ADRP, Papain-like proteinase, transmembrane domain 1	S370L	94	144	3.04	Equivalently S1188L in ORF 1a
nsp3	ADRP, Papain-like proteinase, transmembrane domain 1	K530N	94	94	1.84	Equivalently K1348N in ORF 1a
nsp6	Putative transmembrane domain	H11Y	94	83	2.27	Equivalently H3580Y in ORF 1a
nsp6	Putative transmembrane domain	R93H	94	29	0.82	Equivalently R3662H in ORF 1a
nsp8	Putative primase	E48G	94	98	2.78	Equivalently E3990G in ORF 1a
ORF 3a		G18C	94	158	2.22
ORF 3a		I63T	94	89	2.14
ORF 3a		W69C	94	214	3.34
ORF 3a		K136N	94	94	1.84
ORF 3a		S195Y	94	143	3.33
S	Surface glycoprotein	D111N	94	23	0.65
S	Surface glycoprotein	G181R	94	125	3.58
S	Surface glycoprotein	A626V	94	64	1.85
nsp12	RNA-dependent RNA polymerase	T870I	93	89	2.14	Equivalently T5262I in ORF 1ab
nsp2		N87Y	93	142	3.42	Equivalently N267Y in ORF 1a
nsp2		I273T	93	89	2.14	Equivalently I453T in ORF 1a
nsp4	Transmembrane domain 2	S386F	93	155	3.45	Equivalently S3149F in ORF 1a
ORF 7a		P45L	93	98	2.7
E	Envelope protein	T30I	92	89	2.14
N	Nucleocapsid phosphoprotein	A35S	92	99	0.51
nsp14	Exonuclease	P128S	92	73	0.56	Equivalently P6053S in ORF 1ab
nsp15	EndoRNAse	I252V	92	30	0.85	Equivalently I6704V in ORF 1ab
nsp15	EndoRNAse	P270S	92	73	0.56	Equivalently P6722S in ORF 1ab
nsp16	2'-O-ribose methyltransferase	R216H	92	29	0.82	Equivalently R7014H in ORF 1ab
nsp2		L24F	92	22	0.63	Equivalently L204F in ORF 1a
nsp2		L71F	92	22	0.63	Equivalently L251F in ORF 1a
nsp2		T569A	92	58	0.9	Equivalently T749A in ORF 1a
nsp3	ADRP, Papain-like proteinase, transmembrane domain 1	A450V	92	64	1.85	Equivalently A1268V in ORF 1a
nsp3	ADRP, Papain-like proteinase, transmembrane domain 1	C1223Y	92	194	2.38	Equivalently C2041Y in ORF 1a
nsp4	Transmembrane domain 2	M33L	92	14	0.41	Equivalently M2796L in ORF 1a
nsp4	Transmembrane domain 2	T461N	92	65	1.4	Equivalently T3224N in ORF 1a
nsp9	ssRNA-binding protein	T35I	92	89	2.14	Equivalently T4175I in ORF 1a
ORF 3a		W128C	92	214	3.34
S	Surface glycoprotein	M731I	92	10	0.29
S	Surface glycoprotein	S884F	92	155	3.45
S	Surface glycoprotein	D1260Y	92	160	3.95
nsp10		A32V	91	64	1.85	Equivalently A4285V in ORF 1a
nsp14	Exonuclease	T524I	91	89	2.14	Equivalently T6449I in ORF 1ab
nsp2		F505S	91	155	3.45	Equivalently F685S in ORF 1a
nsp3	ADRP, Papain-like proteinase, transmembrane domain 1	T204I	91	89	2.14	Equivalently T1022I in ORF 1a
nsp3	ADRP, Papain-like proteinase, transmembrane domain 1	T787I	91	89	2.14	Equivalently T1605I in ORF 1a
ORF 7a		P34S	91	73	0.56
ORF 8		G8*	91	-	-
S	Surface glycoprotein	R21K	91	26	0.4
S	Surface glycoprotein	I233V	91	30	0.85
S	Surface glycoprotein	L242H	91	99	2.59
S	Surface glycoprotein	A871S	91	99	0.51
S	Surface glycoprotein	L938F	91	22	0.63
S	Surface glycoprotein	S1147L	91	144	3.04
N	Nucleocapsid phosphoprotein	D3Y	90	160	3.95
N	Nucleocapsid phosphoprotein	D348H	90	81	1.72
nsp10		C46F	90	204	2.24	Equivalently C4299F in ORF 1a
nsp12	RNA-dependent RNA polymerase	G228C	90	158	2.22	Equivalently G4620C in ORF 1ab
nsp13	Zinc-binding domain, NTPase/helicase domain	A302S	90	99	0.51	Equivalently A5626S in ORF 1ab
nsp14	Exonuclease	R289C	90	180	3.06	Equivalently R6214C in ORF 1ab
nsp14	Exonuclease	K339N	90	94	1.84	Equivalently K6264N in ORF 1ab
nsp15	EndoRNAse	K109N	90	94	1.84	Equivalently K6561N in ORF 1ab
nsp15	EndoRNAse	P205L	90	98	2.7	Equivalently P6657L in ORF 1ab
nsp15	EndoRNAse	D282G	90	94	2.37	Equivalently D6734G in ORF 1ab
nsp2		K142R	90	26	0.4	Equivalently K322R in ORF 1a
nsp2		M404V	90	22	0.62	Equivalently M584V in ORF 1a
nsp3	ADRP, Papain-like proteinase, transmembrane domain 1	D59G	90	94	2.37	Equivalently D877G in ORF 1a
nsp3	ADRP, Papain-like proteinase, transmembrane domain 1	T678I	90	89	2.14	Equivalently T1496I in ORF 1a
nsp3	ADRP, Papain-like proteinase, transmembrane domain 1	A1381V	90	64	1.85	Equivalently A2199V in ORF 1a
nsp4	Transmembrane domain 2	V20F	90	50	1.43	Equivalently V2783F in ORF 1a
ORF 6		E55*	90	-	-
ORF 6		P57L	90	98	2.7
ORF 7a		V24F	90	50	1.43
ORF 8		V32I	90	30	0.85
S	Surface glycoprotein	V70F	90	50	1.43
nsp1	Leader protein	V56I	89	30	0.85	Equivalently V56I in ORF 1a
nsp12	RNA-dependent RNA polymerase	A526V	89	64	1.85	Equivalently A4918V in ORF 1ab
nsp12	RNA-dependent RNA polymerase	V848L	89	32	0.91	Equivalently V5240L in ORF 1ab
nsp13	Zinc-binding domain, NTPase/helicase domain	T413I	89	89	2.14	Equivalently T5737I in ORF 1ab
nsp15	EndoRNAse	C290F	89	204	2.24	Equivalently C6742F in ORF 1ab
nsp3	ADRP, Papain-like proteinase, transmembrane domain 1	S69F	89	155	3.45	Equivalently S887F in ORF 1a
nsp3	ADRP, Papain-like proteinase, transmembrane domain 1	T1336I	89	89	2.14	Equivalently T2154I in ORF 1a
S	Surface glycoprotein	V534F	89	50	1.43
S	Surface glycoprotein	A1174V	89	64	1.85
nsp12	RNA-dependent RNA polymerase	V880I	88	30	0.85	Equivalently V5272I in ORF 1ab
nsp2		P181T	88	38	0.87	Equivalently P361T in ORF 1a
nsp2		S358L	88	144	3.04	Equivalently S538L in ORF 1a
nsp3	ADRP, Papain-like proteinase, transmembrane domain 1	S377I	88	142	2.95	Equivalently S1195I in ORF 1a
nsp4	Transmembrane domain 2	S218F	88	155	3.45	Equivalently S2981F in ORF 1a
nsp4	Transmembrane domain 2	T269I	88	89	2.14	Equivalently T3032I in ORF 1a
nsp5	3C-like proteinase	N274D	88	23	0.65	Equivalently N3537D in ORF 1a
ORF 3a		T24I	88	89	2.14
ORF 6		R20S	88	109	2.74
ORF 7a		S36P	88	73	0.56
S	Surface glycoprotein	T678I	88	89	2.14
N	Nucleocapsid phosphoprotein	P122H	87	76	2.15
nsp12	RNA-dependent RNA polymerase	D60Y	87	160	3.95	Equivalently D4452Y in ORF 1ab
nsp12	RNA-dependent RNA polymerase	A382V	87	64	1.85	Equivalently A4774V in ORF 1ab
nsp13	Zinc-binding domain, NTPase/helicase domain	T250I	87	89	2.14	Equivalently T5574I in ORF 1ab
nsp15	EndoRNAse	T114M	87	81	1.86	Equivalently T6566M in ORF 1ab
nsp2		G265V	87	109	2.76	Equivalently G445V in ORF 1a
nsp3	ADRP, Papain-like proteinase, transmembrane domain 1	P985L	87	98	2.7	Equivalently P1803L in ORF 1a
nsp3	ADRP, Papain-like proteinase, transmembrane domain 1	L1287F	87	22	0.63	Equivalently L2105F in ORF 1a
nsp3	ADRP, Papain-like proteinase, transmembrane domain 1	P1921S	87	73	0.56	Equivalently P2739S in ORF 1a
nsp4	Transmembrane domain 2	H470Y	87	83	2.27	Equivalently H3233Y in ORF 1a
S	Surface glycoprotein	S673T	87	58	0.89
N	Nucleocapsid phosphoprotein	A134V	86	64	1.85
nsp12	RNA-dependent RNA polymerase	D107N	86	23	0.65	Equivalently D4499N in ORF 1ab
nsp13	Zinc-binding domain, NTPase/helicase domain	L322S	86	144	3.04	Equivalently L5646S in ORF 1ab
nsp2		K219R	86	26	0.4	Equivalently K399R in ORF 1a
nsp2		S378F	86	155	3.45	Equivalently S558F in ORF 1a
nsp2		R380C	86	180	3.06	Equivalently R560C in ORF 1a
nsp9	ssRNA-binding protein	P80L	86	98	2.7	Equivalently P4220L in ORF 1a
S	Surface glycoprotein	T33I	86	89	2.14
S	Surface glycoprotein	P384L	86	98	2.7
S	Surface glycoprotein	I818V	86	30	0.85
S	Surface glycoprotein	V1065L	86	32	0.91
M	Membrane glycoprotein	S4F	85	155	3.45
M	Membrane glycoprotein	I80F	85	21	0.61
nsp13	Zinc-binding domain, NTPase/helicase domain	M474I	85	10	0.29	Equivalently M5798I in ORF 1ab
nsp13	Zinc-binding domain, NTPase/helicase domain	V496L	85	32	0.91	Equivalently V5820L in ORF 1ab
nsp15	EndoRNAse	E223G	85	98	2.78	Equivalently E6675G in ORF 1ab
nsp16	2'-O-ribose methyltransferase	K141R	85	26	0.4	Equivalently K6939R in ORF 1ab
nsp3	ADRP, Papain-like proteinase, transmembrane domain 1	T771I	85	89	2.14	Equivalently T1589I in ORF 1a
nsp3	ADRP, Papain-like proteinase, transmembrane domain 1	K902N	85	94	1.84	Equivalently K1720N in ORF 1a
nsp5	3C-like proteinase	T21I	85	89	2.14	Equivalently T3284I in ORF 1a
nsp5	3C-like proteinase	A234S	85	99	0.51	Equivalently A3497S in ORF 1a
nsp8	Putative primase	D30G	85	94	2.37	Equivalently D3972G in ORF 1a
ORF 3a		N137Y	85	142	3.42
ORF 3a		Y264C	85	194	2.38
ORF 7a		V29L	85	32	0.91
S	Surface glycoprotein	F318L	85	22	0.63
S	Surface glycoprotein	A684V	85	64	1.85
S	Surface glycoprotein	T1027I	85	89	2.14
S	Surface glycoprotein	S1252P	85	73	0.56
nsp1	Leader protein	D147G	84	94	2.37	Equivalently D147G in ORF 1a
nsp12	RNA-dependent RNA polymerase	M668I	84	10	0.29	Equivalently M5060I in ORF 1ab
nsp12	RNA-dependent RNA polymerase	H928Y	84	83	2.27	Equivalently H5320Y in ORF 1ab
nsp13	Zinc-binding domain, NTPase/helicase domain	P402S	84	73	0.56	Equivalently P5726S in ORF 1ab
nsp13	Zinc-binding domain, NTPase/helicase domain	P419S	84	73	0.56	Equivalently P5743S in ORF 1ab
nsp3	ADRP, Papain-like proteinase, transmembrane domain 1	E374D	84	45	0.9	Equivalently E1192D in ORF 1a
nsp3	ADRP, Papain-like proteinase, transmembrane domain 1	T479I	84	89	2.14	Equivalently T1297I in ORF 1a
nsp3	ADRP, Papain-like proteinase, transmembrane domain 1	G887C	84	158	2.22	Equivalently G1705C in ORF 1a
nsp3	ADRP, Papain-like proteinase, transmembrane domain 1	S1333G	84	55	0.85	Equivalently S2151G in ORF 1a
nsp3	ADRP, Papain-like proteinase, transmembrane domain 1	A1537S	84	99	0.51	Equivalently A2355S in ORF 1a
nsp3	ADRP, Papain-like proteinase, transmembrane domain 1	S1734A	84	99	0.51	Equivalently S2552A in ORF 1a
nsp5	3C-like proteinase	C38F	84	204	2.24	Equivalently C3301F in ORF 1a
S	Surface glycoprotein	F157L	84	22	0.63
S	Surface glycoprotein	T299I	84	89	2.14
N	Nucleocapsid phosphoprotein	L167F	83	22	0.63
N	Nucleocapsid phosphoprotein	G238S	83	55	0.85
nsp15	EndoRNAse	R257C	83	180	3.06	Equivalently R6709C in ORF 1ab
nsp16	2'-O-ribose methyltransferase	D179Y	83	160	3.95	Equivalently D6977Y in ORF 1ab
nsp3	ADRP, Papain-like proteinase, transmembrane domain 1	V381F	83	50	1.43	Equivalently V1199F in ORF 1a
nsp4	Transmembrane domain 2	L18F	83	22	0.63	Equivalently L2781F in ORF 1a
nsp6	Putative transmembrane domain	M92I	83	10	0.29	Equivalently M3661I in ORF 1a
S	Surface glycoprotein	T547I	83	89	2.14
M	Membrane glycoprotein	I48V	82	30	0.85
N	Nucleocapsid phosphoprotein	Q240K	82	53	1.06
N	Nucleocapsid phosphoprotein	D399Y	82	160	3.95
nsp14	Exonuclease	D379A	82	126	2.37	Equivalently D6304A in ORF 1ab
nsp2		T412I	82	89	2.14	Equivalently T592I in ORF 1a
nsp3	ADRP, Papain-like proteinase, transmembrane domain 1	E1696K	82	57	1.14	Equivalently E2514K in ORF 1a
nsp8	Putative primase	I156V	82	30	0.85	Equivalently I4098V in ORF 1a
ORF 3a		Q38P	82	75	1.92
S	Surface glycoprotein	S151I	82	142	2.95
S	Surface glycoprotein	V576F	82	50	1.43
S	Surface glycoprotein	D1146H	82	81	1.72
M	Membrane glycoprotein	L29F	81	22	0.63
N	Nucleocapsid phosphoprotein	T16M	81	81	1.86
nsp1	Leader protein	H81Y	81	83	2.27	Equivalently H81Y in ORF 1a
nsp12	RNA-dependent RNA polymerase	D153Y	81	160	3.95	Equivalently D4545Y in ORF 1ab
nsp13	Zinc-binding domain, NTPase/helicase domain	A237V	81	64	1.85	Equivalently A5561V in ORF 1ab
nsp13	Zinc-binding domain, NTPase/helicase domain	A292S	81	99	0.51	Equivalently A5616S in ORF 1ab
nsp15	EndoRNAse	S147I	81	142	2.95	Equivalently S6599I in ORF 1ab
nsp15	EndoRNAse	D219N	81	23	0.65	Equivalently D6671N in ORF 1ab
nsp2		G165S	81	55	0.85	Equivalently G345S in ORF 1a
nsp2		E167D	81	45	0.9	Equivalently E347D in ORF 1a
nsp2		I367V	81	30	0.85	Equivalently I547V in ORF 1a
nsp4	Transmembrane domain 2	T37I	81	89	2.14	Equivalently T2800I in ORF 1a
nsp8	Putative primase	K37N	81	94	1.84	Equivalently K3979N in ORF 1a
ORF 3a		W131R	81	101	2.72
ORF 7a		H73Y	81	83	2.27
S	Surface glycoprotein	P812S	81	73	0.56
N	Nucleocapsid phosphoprotein	Q7K	80	53	1.06
N	Nucleocapsid phosphoprotein	S412I	80	142	2.95
nsp13	Zinc-binding domain, NTPase/helicase domain	P172S	80	73	0.56	Equivalently P5496S in ORF 1ab
nsp13	Zinc-binding domain, NTPase/helicase domain	L295I	80	5	0.14	Equivalently L5619I in ORF 1ab
nsp14	Exonuclease	F377L	80	22	0.63	Equivalently F6302L in ORF 1ab
nsp14	Exonuclease	G481S	80	55	0.85	Equivalently G6406S in ORF 1ab
nsp16	2'-O-ribose methyltransferase	A178V	80	64	1.85	Equivalently A6976V in ORF 1ab
nsp3	ADRP, Papain-like proteinase, transmembrane domain 1	T217I	80	89	2.14	Equivalently T1035I in ORF 1a
nsp3	ADRP, Papain-like proteinase, transmembrane domain 1	S699F	80	155	3.45	Equivalently S1517F in ORF 1a
nsp3	ADRP, Papain-like proteinase, transmembrane domain 1	R1614K	80	26	0.4	Equivalently R2432K in ORF 1a
nsp3	ADRP, Papain-like proteinase, transmembrane domain 1	V1897I	80	30	0.85	Equivalently V2715I in ORF 1a
nsp5	3C-like proteinase	L220F	80	22	0.63	Equivalently L3483F in ORF 1a
nsp7		E50G	80	98	2.78	Equivalently E3909G in ORF 1a
nsp8	Putative primase	A74V	80	64	1.85	Equivalently A4016V in ORF 1a
S	Surface glycoprotein	D796Y	80	160	3.95
S	Surface glycoprotein	D979Y	80	160	3.95
N	Nucleocapsid phosphoprotein	P365L	79	98	2.7
nsp12	RNA-dependent RNA polymerase	T226M	79	81	1.86	Equivalently T4618M in ORF 1ab
nsp12	RNA-dependent RNA polymerase	T319I	79	89	2.14	Equivalently T4711I in ORF 1ab
nsp12	RNA-dependent RNA polymerase	H882R	79	29	0.82	Equivalently H5274R in ORF 1ab
nsp13	Zinc-binding domain, NTPase/helicase domain	M429I	79	10	0.29	Equivalently M5753I in ORF 1ab
nsp14	Exonuclease	V290F	79	50	1.43	Equivalently V6215F in ORF 1ab
nsp14	Exonuclease	D345G	79	94	2.37	Equivalently D6270G in ORF 1ab
nsp15	EndoRNAse	G129S	79	55	0.85	Equivalently G6581S in ORF 1ab
nsp2		S301F	79	155	3.45	Equivalently S481F in ORF 1a
nsp3	ADRP, Papain-like proteinase, transmembrane domain 1	P992L	79	98	2.7	Equivalently P1810L in ORF 1a
nsp3	ADRP, Papain-like proteinase, transmembrane domain 1	K1325R	79	26	0.4	Equivalently K2143R in ORF 1a
nsp3	ADRP, Papain-like proteinase, transmembrane domain 1	S1675I	79	142	2.95	Equivalently S2493I in ORF 1a
ORF 10		A8V	79	64	1.85
ORF 3a		E194K	79	57	1.14
ORF 6		E55D	79	45	0.9
ORF 7a		Q76H	79	24	0.32
ORF 8		S69P	79	73	0.56
S	Surface glycoprotein	S813I	79	142	2.95
E	Envelope protein	D72Y	78	160	3.95
N	Nucleocapsid phosphoprotein	P368S	78	73	0.56
nsp1	Leader protein	R73C	78	180	3.06	Equivalently R73C in ORF 1a
nsp12	RNA-dependent RNA polymerase	D140Y	78	160	3.95	Equivalently D4532Y in ORF 1ab
nsp12	RNA-dependent RNA polymerase	G774S	78	55	0.85	Equivalently G5166S in ORF 1ab
nsp13	Zinc-binding domain, NTPase/helicase domain	A509V	78	64	1.85	Equivalently A5833V in ORF 1ab
nsp13	Zinc-binding domain, NTPase/helicase domain	P529L	78	98	2.7	Equivalently P5853L in ORF 1ab
nsp14	Exonuclease	H95Y	78	83	2.27	Equivalently H6020Y in ORF 1ab
nsp14	Exonuclease	M153I	78	10	0.29	Equivalently M6078I in ORF 1ab
nsp15	EndoRNAse	P65S	78	73	0.56	Equivalently P6517S in ORF 1ab
nsp2		L113F	78	22	0.63	Equivalently L293F in ORF 1a
nsp3	ADRP, Papain-like proteinase, transmembrane domain 1	V765F	78	50	1.43	Equivalently V1583F in ORF 1a
nsp3	ADRP, Papain-like proteinase, transmembrane domain 1	T936I	78	89	2.14	Equivalently T1754I in ORF 1a
nsp3	ADRP, Papain-like proteinase, transmembrane domain 1	E1271D	78	45	0.9	Equivalently E2089D in ORF 1a
nsp3	ADRP, Papain-like proteinase, transmembrane domain 1	L1301F	78	22	0.63	Equivalently L2119F in ORF 1a
nsp3	ADRP, Papain-like proteinase, transmembrane domain 1	G1849C	78	158	2.22	Equivalently G2667C in ORF 1a
S	Surface glycoprotein	S13I	78	142	2.95
S	Surface glycoprotein	T19K	78	78	2.1
S	Surface glycoprotein	A27V	78	64	1.85
S	Surface glycoprotein	S71P	78	73	0.56
S	Surface glycoprotein	P1162R	78	103	2.9
nsp1	Leader protein	S166G	77	55	0.85	Equivalently S166G in ORF 1a
nsp10		T111I	77	89	2.14	Equivalently T4364I in ORF 1a
nsp12	RNA-dependent RNA polymerase	S325I	77	142	2.95	Equivalently S4717I in ORF 1ab
nsp13	Zinc-binding domain, NTPase/helicase domain	V98F	77	50	1.43	Equivalently V5422F in ORF 1ab
nsp13	Zinc-binding domain, NTPase/helicase domain	D315Y	77	160	3.95	Equivalently D5639Y in ORF 1ab
nsp13	Zinc-binding domain, NTPase/helicase domain	T351I	77	89	2.14	Equivalently T5675I in ORF 1ab
nsp13	Zinc-binding domain, NTPase/helicase domain	G478C	77	158	2.22	Equivalently G5802C in ORF 1ab
nsp14	Exonuclease	R205C	77	180	3.06	Equivalently R6130C in ORF 1ab
nsp14	Exonuclease	A360V	77	64	1.85	Equivalently A6285V in ORF 1ab
nsp2		E574D	77	45	0.9	Equivalently E754D in ORF 1a
nsp3	ADRP, Papain-like proteinase, transmembrane domain 1	S403L	77	144	3.04	Equivalently S1221L in ORF 1a
nsp3	ADRP, Papain-like proteinase, transmembrane domain 1	S1314G	77	55	0.85	Equivalently S2132G in ORF 1a
nsp3	ADRP, Papain-like proteinase, transmembrane domain 1	M1529R	77	92	2.29	Equivalently M2347R in ORF 1a
nsp4	Transmembrane domain 2	A146V	77	64	1.85	Equivalently A2909V in ORF 1a
ORF 3a		G49S	77	55	0.85
S	Surface glycoprotein	W152L	77	61	1.73
nsp12	RNA-dependent RNA polymerase	D893Y	76	160	3.95	Equivalently D5285Y in ORF 1ab
nsp13	Zinc-binding domain, NTPase/helicase domain	I480T	76	89	2.14	Equivalently I5804T in ORF 1ab
nsp14	Exonuclease	G248V	76	109	2.76	Equivalently G6173V in ORF 1ab
nsp14	Exonuclease	A371V	76	64	1.85	Equivalently A6296V in ORF 1ab
nsp3	ADRP, Papain-like proteinase, transmembrane domain 1	E158*	76	-	-	Equivalently E976* in ORF 1a
nsp3	ADRP, Papain-like proteinase, transmembrane domain 1	R568C	76	180	3.06	Equivalently R1386C in ORF 1a
nsp4	Transmembrane domain 2	T439M	76	81	1.86	Equivalently T3202M in ORF 1a
nsp9	ssRNA-binding protein	P80S	76	73	0.56	Equivalently P4220S in ORF 1a
S	Surface glycoprotein	L1063F	76	22	0.63
N	Nucleocapsid phosphoprotein	T366R	75	71	2.03
nsp1	Leader protein	D139G	75	94	2.37	Equivalently D139G in ORF 1a
nsp14	Exonuclease	P43S	75	73	0.56	Equivalently P5968S in ORF 1ab
nsp2		Q496P	75	75	1.92	Equivalently Q676P in ORF 1a
nsp3	ADRP, Papain-like proteinase, transmembrane domain 1	L1802F	75	22	0.63	Equivalently L2620F in ORF 1a
nsp4	Transmembrane domain 2	W6C	75	214	3.34	Equivalently W2769C in ORF 1a
nsp9	ssRNA-binding protein	D47N	75	23	0.65	Equivalently D4187N in ORF 1a
ORF 3a		P25L	75	98	2.7
ORF 3a		A99T	75	58	0.9
ORF 3a		T268M	75	81	1.86
S	Surface glycoprotein	Q14H	75	24	0.32
S	Surface glycoprotein	G261S	75	55	0.85
S	Surface glycoprotein	A344S	75	99	0.51
S	Surface glycoprotein	T549A	75	58	0.9
S	Surface glycoprotein	A701S	75	99	0.51
S	Surface glycoprotein	H1101Y	75	83	2.27
S	Surface glycoprotein	C1243F	75	204	2.24
N	Nucleocapsid phosphoprotein	R14C	74	180	3.06
N	Nucleocapsid phosphoprotein	S193T	74	58	0.89
N	Nucleocapsid phosphoprotein	R195K	74	26	0.4
N	Nucleocapsid phosphoprotein	D371Y	74	160	3.95
N	Nucleocapsid phosphoprotein	Q389H	74	24	0.32
nsp1	Leader protein	D33N	74	23	0.65	Equivalently D33N in ORF 1a
nsp1	Leader protein	E102K	74	57	1.14	Equivalently E102K in ORF 1a
nsp13	Zinc-binding domain, NTPase/helicase domain	E365D	74	45	0.9	Equivalently E5689D in ORF 1ab
nsp14	Exonuclease	Q354H	74	24	0.32	Equivalently Q6279H in ORF 1ab
nsp14	Exonuclease	D496Y	74	160	3.95	Equivalently D6421Y in ORF 1ab
nsp3	ADRP, Papain-like proteinase, transmembrane domain 1	T237I	74	89	2.14	Equivalently T1055I in ORF 1a
nsp3	ADRP, Papain-like proteinase, transmembrane domain 1	A256V	74	64	1.85	Equivalently A1074V in ORF 1a
nsp3	ADRP, Papain-like proteinase, transmembrane domain 1	C1029R	74	180	3.06	Equivalently C1847R in ORF 1a
nsp3	ADRP, Papain-like proteinase, transmembrane domain 1	S1039L	74	144	3.04	Equivalently S1857L in ORF 1a
nsp3	ADRP, Papain-like proteinase, transmembrane domain 1	N1053S	74	46	1.31	Equivalently N1871S in ORF 1a
nsp3	ADRP, Papain-like proteinase, transmembrane domain 1	V1248L	74	32	0.91	Equivalently V2066L in ORF 1a
nsp5	3C-like proteinase	T225I	74	89	2.14	Equivalently T3488I in ORF 1a
nsp6	Putative transmembrane domain	Q290H	74	24	0.32	Equivalently Q3859H in ORF 1a
ORF 10		I4L	74	5	0.14
ORF 3a		A98V	74	64	1.85
ORF 3a		L101F	74	22	0.63
ORF 7a		A50V	74	64	1.85
S	Surface glycoprotein	A27T	74	58	0.9
S	Surface glycoprotein	A1078V	74	64	1.85
S	Surface glycoprotein	E1202Q	74	29	0.84
E	Envelope protein	V24M	73	22	0.62
nsp12	RNA-dependent RNA polymerase	P94L	73	98	2.7	Equivalently P4486L in ORF 1ab
nsp12	RNA-dependent RNA polymerase	I171M	73	10	0.29	Equivalently I4563M in ORF 1ab
nsp12	RNA-dependent RNA polymerase	N691K	73	94	1.84	Equivalently N5083K in ORF 1ab
nsp14	Exonuclease	I166V	73	30	0.85	Equivalently I6091V in ORF 1ab
nsp16	2'-O-ribose methyltransferase	L111F	73	22	0.63	Equivalently L6909F in ORF 1ab
nsp2		T153M	73	81	1.86	Equivalently T333M in ORF 1a
nsp2		S369F	73	155	3.45	Equivalently S549F in ORF 1a
nsp3	ADRP, Papain-like proteinase, transmembrane domain 1	D174N	73	23	0.65	Equivalently D992N in ORF 1a
nsp3	ADRP, Papain-like proteinase, transmembrane domain 1	L956I	73	5	0.14	Equivalently L1774I in ORF 1a
nsp5	3C-like proteinase	T135I	73	89	2.14	Equivalently T3398I in ORF 1a
nsp6	Putative transmembrane domain	M47I	73	10	0.29	Equivalently M3616I in ORF 1a
ORF 3a		H182R	73	29	0.82
ORF 7a		L17F	73	22	0.63
ORF 7a		A66T	73	58	0.9
ORF 8		G66C	73	158	2.22
S	Surface glycoprotein	A892S	73	99	0.51
N	Nucleocapsid phosphoprotein	P168Q	72	75	1.92
N	Nucleocapsid phosphoprotein	S416L	72	144	3.04
nsp1	Leader protein	Q96H	72	24	0.32	Equivalently Q96H in ORF 1a
nsp12	RNA-dependent RNA polymerase	M124I	72	10	0.29	Equivalently M4516I in ORF 1ab
nsp12	RNA-dependent RNA polymerase	P918L	72	98	2.7	Equivalently P5310L in ORF 1ab
nsp13	Zinc-binding domain, NTPase/helicase domain	P78S	72	73	0.56	Equivalently P5402S in ORF 1ab
nsp2		E574A	72	107	2.46	Equivalently E754A in ORF 1a
nsp3	ADRP, Papain-like proteinase, transmembrane domain 1	K19R	72	26	0.4	Equivalently K837R in ORF 1a
nsp3	ADRP, Papain-like proteinase, transmembrane domain 1	R586C	72	180	3.06	Equivalently R1404C in ORF 1a
nsp3	ADRP, Papain-like proteinase, transmembrane domain 1	L781F	72	22	0.63	Equivalently L1599F in ORF 1a
nsp3	ADRP, Papain-like proteinase, transmembrane domain 1	D1121N	72	23	0.65	Equivalently D1939N in ORF 1a
nsp3	ADRP, Papain-like proteinase, transmembrane domain 1	Q1216L	72	112	2.7	Equivalently Q2034L in ORF 1a
nsp4	Transmembrane domain 2	T114I	72	89	2.14	Equivalently T2877I in ORF 1a
nsp4	Transmembrane domain 2	A316T	72	58	0.9	Equivalently A3079T in ORF 1a
nsp5	3C-like proteinase	S81F	72	155	3.45	Equivalently S3344F in ORF 1a
ORF 3a		P42L	72	98	2.7
ORF 3a		W131L	72	61	1.73
ORF 7b		M1I	72	10	0.29
ORF 8		P93L	72	98	2.7
S	Surface glycoprotein	P631S	72	73	0.56
S	Surface glycoprotein	P728L	72	98	2.7
nsp3	ADRP, Papain-like proteinase, transmembrane domain 1	G171V	71	109	2.76	Equivalently G989V in ORF 1a
nsp3	ADRP, Papain-like proteinase, transmembrane domain 1	A1033V	71	64	1.85	Equivalently A1851V in ORF 1a
nsp4	Transmembrane domain 2	T237I	71	89	2.14	Equivalently T3000I in ORF 1a
nsp4	Transmembrane domain 2	K399E	71	57	1.14	Equivalently K3162E in ORF 1a
nsp5	3C-like proteinase	P96L	71	98	2.7	Equivalently P3359L in ORF 1a
nsp5	3C-like proteinase	R279C	71	180	3.06	Equivalently R3542C in ORF 1a
nsp6	Putative transmembrane domain	I50V	71	30	0.85	Equivalently I3619V in ORF 1a
S	Surface glycoprotein	T73I	71	89	2.14
S	Surface glycoprotein	D936H	71	81	1.72
S	Surface glycoprotein	A942S	71	99	0.51
M	Membrane glycoprotein	T7I	70	89	2.14
M	Membrane glycoprotein	A104V	70	64	1.85
N	Nucleocapsid phosphoprotein	G215V	70	109	2.76
N	Nucleocapsid phosphoprotein	K373R	70	26	0.4
nsp10		T51I	70	89	2.14	Equivalently T4304I in ORF 1a
nsp12	RNA-dependent RNA polymerase	V257F	70	50	1.43	Equivalently V4649F in ORF 1ab
nsp12	RNA-dependent RNA polymerase	D284Y	70	160	3.95	Equivalently D4676Y in ORF 1ab
nsp12	RNA-dependent RNA polymerase	E370*	70	-	-	Equivalently E4762* in ORF 1ab
nsp12	RNA-dependent RNA polymerase	S607I	70	142	2.95	Equivalently S4999I in ORF 1ab
nsp2		V480A	70	64	1.85	Equivalently V660A in ORF 1a
nsp3	ADRP, Papain-like proteinase, transmembrane domain 1	V207L	70	32	0.91	Equivalently V1025L in ORF 1a
nsp3	ADRP, Papain-like proteinase, transmembrane domain 1	V473I	70	30	0.85	Equivalently V1291I in ORF 1a
nsp3	ADRP, Papain-like proteinase, transmembrane domain 1	S794L	70	144	3.04	Equivalently S1612L in ORF 1a
nsp4	Transmembrane domain 2	G130V	70	109	2.76	Equivalently G2893V in ORF 1a
nsp5	3C-like proteinase	S1C	70	112	1.84	Equivalently S3264C in ORF 1a
nsp6	Putative transmembrane domain	P44S	70	73	0.56	Equivalently P3613S in ORF 1a
nsp6	Putative transmembrane domain	V190F	70	50	1.43	Equivalently V3759F in ORF 1a
ORF 3a		S60Y	70	143	3.33
ORF 3a		L96F	70	22	0.63
ORF 3a		G254R	70	125	3.58
ORF 6		H3Y	70	83	2.27
ORF 7a		P99L	70	98	2.7
S	Surface glycoprotein	D215V	70	152	3.4
S	Surface glycoprotein	D1118Y	70	160	3.95
M	Membrane glycoprotein	W31C	69	214	3.34
N	Nucleocapsid phosphoprotein	T24N	69	65	1.4
N	Nucleocapsid phosphoprotein	D103G	69	94	2.37
nsp1	Leader protein	T12I	69	89	2.14	Equivalently T12I in ORF 1a
nsp12	RNA-dependent RNA polymerase	C563F	69	204	2.24	Equivalently C4955F in ORF 1ab
nsp12	RNA-dependent RNA polymerase	G671S	69	55	0.85	Equivalently G5063S in ORF 1ab
nsp13	Zinc-binding domain, NTPase/helicase domain	T115I	69	89	2.14	Equivalently T5439I in ORF 1ab
nsp14	Exonuclease	I15T	69	89	2.14	Equivalently I5940T in ORF 1ab
nsp14	Exonuclease	A323S	69	99	0.51	Equivalently A6248S in ORF 1ab
nsp14	Exonuclease	A504S	69	99	0.51	Equivalently A6429S in ORF 1ab
nsp15	EndoRNAse	P111S	69	73	0.56	Equivalently P6563S in ORF 1ab
nsp2		A419V	69	64	1.85	Equivalently A599V in ORF 1a
nsp2		W432C	69	214	3.34	Equivalently W612C in ORF 1a
nsp3	ADRP, Papain-like proteinase, transmembrane domain 1	E387D	69	45	0.9	Equivalently E1205D in ORF 1a
nsp3	ADRP, Papain-like proteinase, transmembrane domain 1	V469A	69	64	1.85	Equivalently V1287A in ORF 1a
nsp3	ADRP, Papain-like proteinase, transmembrane domain 1	T686I	69	89	2.14	Equivalently T1504I in ORF 1a
nsp3	ADRP, Papain-like proteinase, transmembrane domain 1	Y698H	69	83	2.27	Equivalently Y1516H in ORF 1a
nsp3	ADRP, Papain-like proteinase, transmembrane domain 1	P723S	69	73	0.56	Equivalently P1541S in ORF 1a
nsp3	ADRP, Papain-like proteinase, transmembrane domain 1	P1261T	69	38	0.87	Equivalently P2079T in ORF 1a
nsp3	ADRP, Papain-like proteinase, transmembrane domain 1	E1294G	69	98	2.78	Equivalently E2112G in ORF 1a
nsp5	3C-like proteinase	P184S	69	73	0.56	Equivalently P3447S in ORF 1a
nsp5	3C-like proteinase	L232F	69	22	0.63	Equivalently L3495F in ORF 1a
nsp6	Putative transmembrane domain	L33F	69	22	0.63	Equivalently L3602F in ORF 1a
ORF 3a		L65F	69	22	0.63
ORF 3a		W128L	69	61	1.73
ORF 3a		T269M	69	81	1.86
ORF 8		Q18K	69	53	1.06
ORF 8		A55V	69	64	1.85
S	Surface glycoprotein	P809S	69	73	0.56
N	Nucleocapsid phosphoprotein	N192K	68	94	1.84
nsp12	RNA-dependent RNA polymerase	A253S	68	99	0.51	Equivalently A4645S in ORF 1ab
nsp12	RNA-dependent RNA polymerase	A771V	68	64	1.85	Equivalently A5163V in ORF 1ab
nsp13	Zinc-binding domain, NTPase/helicase domain	A208V	68	64	1.85	Equivalently A5532V in ORF 1ab
nsp13	Zinc-binding domain, NTPase/helicase domain	P254L	68	98	2.7	Equivalently P5578L in ORF 1ab
nsp13	Zinc-binding domain, NTPase/helicase domain	E319D	68	45	0.9	Equivalently E5643D in ORF 1ab
nsp16	2'-O-ribose methyltransferase	N268K	68	94	1.84	Equivalently N7066K in ORF 1ab
nsp2		H532Y	68	83	2.27	Equivalently H712Y in ORF 1a
nsp2		P589S	68	73	0.56	Equivalently P769S in ORF 1a
nsp2		T601I	68	89	2.14	Equivalently T781I in ORF 1a
nsp3	ADRP, Papain-like proteinase, transmembrane domain 1	T583I	68	89	2.14	Equivalently T1401I in ORF 1a
nsp3	ADRP, Papain-like proteinase, transmembrane domain 1	T808I	68	89	2.14	Equivalently T1626I in ORF 1a
nsp3	ADRP, Papain-like proteinase, transmembrane domain 1	T1056I	68	89	2.14	Equivalently T1874I in ORF 1a
nsp3	ADRP, Papain-like proteinase, transmembrane domain 1	S1106N	68	46	1.31	Equivalently S1924N in ORF 1a
nsp3	ADRP, Papain-like proteinase, transmembrane domain 1	M1436V	68	22	0.62	Equivalently M2254V in ORF 1a
nsp4	Transmembrane domain 2	S238N	68	46	1.31	Equivalently S3001N in ORF 1a
nsp5	3C-like proteinase	A255V	68	64	1.85	Equivalently A3518V in ORF 1a
nsp6	Putative transmembrane domain	V84F	68	50	1.43	Equivalently V3653F in ORF 1a
nsp8	Putative primase	R75K	68	26	0.4	Equivalently R4017K in ORF 1a
nsp8	Putative primase	P178S	68	73	0.56	Equivalently P4120S in ORF 1a
S	Surface glycoprotein	E281V	68	121	2.97
S	Surface glycoprotein	E309Q	68	29	0.84
M	Membrane glycoprotein	K15N	67	94	1.84
M	Membrane glycoprotein	A142V	67	64	1.85
N	Nucleocapsid phosphoprotein	T76I	67	89	2.14
nsp1	Leader protein	T151A	67	58	0.9	Equivalently T151A in ORF 1a
nsp12	RNA-dependent RNA polymerase	A43V	67	64	1.85	Equivalently A4435V in ORF 1ab
nsp12	RNA-dependent RNA polymerase	V299F	67	50	1.43	Equivalently V4691F in ORF 1ab
nsp12	RNA-dependent RNA polymerase	A311S	67	99	0.51	Equivalently A4703S in ORF 1ab
nsp13	Zinc-binding domain, NTPase/helicase domain	F475V	67	50	1.43	Equivalently F5799V in ORF 1ab
nsp13	Zinc-binding domain, NTPase/helicase domain	S589N	67	46	1.31	Equivalently S5913N in ORF 1ab
nsp15	EndoRNAse	V35F	67	50	1.43	Equivalently V6487F in ORF 1ab
nsp2		P181L	67	98	2.7	Equivalently P361L in ORF 1a
nsp2		G212C	67	158	2.22	Equivalently G392C in ORF 1a
nsp3	ADRP, Papain-like proteinase, transmembrane domain 1	P67L	67	98	2.7	Equivalently P885L in ORF 1a
nsp3	ADRP, Papain-like proteinase, transmembrane domain 1	A358V	67	64	1.85	Equivalently A1176V in ORF 1a
nsp3	ADRP, Papain-like proteinase, transmembrane domain 1	V1298L	67	32	0.91	Equivalently V2116L in ORF 1a
nsp3	ADRP, Papain-like proteinase, transmembrane domain 1	L1718F	67	22	0.63	Equivalently L2536F in ORF 1a
nsp4	Transmembrane domain 2	K8N	67	94	1.84	Equivalently K2771N in ORF 1a
ORF 3a		S26A	67	99	0.51
ORF 7a		H47N	67	68	1.29
ORF 8		A51S	67	99	0.51
S	Surface glycoprotein	Q52*	67	-	-
S	Surface glycoprotein	I119V	67	30	0.85
S	Surface glycoprotein	G639S	67	55	0.85
E	Envelope protein	I46V	66	30	0.85
N	Nucleocapsid phosphoprotein	K374N	66	94	1.84
nsp12	RNA-dependent RNA polymerase	K545N	66	94	1.84	Equivalently K4937N in ORF 1ab
nsp15	EndoRNAse	A92V	66	64	1.85	Equivalently A6544V in ORF 1ab
nsp15	EndoRNAse	E170*	66	-	-	Equivalently E6622* in ORF 1ab
nsp2		N9S	66	46	1.31	Equivalently N189S in ORF 1a
nsp3	ADRP, Papain-like proteinase, transmembrane domain 1	T182I	66	89	2.14	Equivalently T1000I in ORF 1a
nsp3	ADRP, Papain-like proteinase, transmembrane domain 1	T847I	66	89	2.14	Equivalently T1665I in ORF 1a
nsp3	ADRP, Papain-like proteinase, transmembrane domain 1	P968S	66	73	0.56	Equivalently P1786S in ORF 1a
nsp3	ADRP, Papain-like proteinase, transmembrane domain 1	T1026I	66	89	2.14	Equivalently T1844I in ORF 1a
nsp3	ADRP, Papain-like proteinase, transmembrane domain 1	T1334I	66	89	2.14	Equivalently T2152I in ORF 1a
nsp4	Transmembrane domain 2	L323I	66	5	0.14	Equivalently L3086I in ORF 1a
nsp7		L17F	66	22	0.63	Equivalently L3876F in ORF 1a
nsp9	ssRNA-binding protein	T34I	66	89	2.14	Equivalently T4174I in ORF 1a
ORF 7a		E16D	66	45	0.9
ORF 7a		R78C	66	180	3.06
S	Surface glycoprotein	T19I	66	89	2.14
S	Surface glycoprotein	R765L	66	102	2.62
S	Surface glycoprotein	E1207D	66	45	0.9
S	Surface glycoprotein	T1238I	66	89	2.14
N	Nucleocapsid phosphoprotein	G18C	65	158	2.22
N	Nucleocapsid phosphoprotein	L161F	65	22	0.63
N	Nucleocapsid phosphoprotein	G164R	65	125	3.58
N	Nucleocapsid phosphoprotein	R203S	65	109	2.74
nsp16	2'-O-ribose methyltransferase	M20I	65	10	0.29	Equivalently M6818I in ORF 1ab
nsp2		G313D	65	94	2.37	Equivalently G493D in ORF 1a
nsp3	ADRP, Papain-like proteinase, transmembrane domain 1	E154K	65	57	1.14	Equivalently E972K in ORF 1a
nsp3	ADRP, Papain-like proteinase, transmembrane domain 1	T1250P	65	38	0.87	Equivalently T2068P in ORF 1a
nsp3	ADRP, Papain-like proteinase, transmembrane domain 1	A1872V	65	64	1.85	Equivalently A2690V in ORF 1a
nsp4	Transmembrane domain 2	I289V	65	30	0.85	Equivalently I3052V in ORF 1a
nsp6	Putative transmembrane domain	M58I	65	10	0.29	Equivalently M3627I in ORF 1a
ORF 10		I13L	65	5	0.14
ORF 3a		D27H	65	81	1.72
ORF 3a		K136E	65	57	1.14
ORF 7a		Q94*	65	-	-
ORF 7a		E95*	65	-	-
ORF 8		L4F	65	22	0.63
S	Surface glycoprotein	E554D	65	45	0.9
S	Surface glycoprotein	P809L	65	98	2.7
S	Surface glycoprotein	L841R	65	102	2.62
M	Membrane glycoprotein	T208I	64	89	2.14
N	Nucleocapsid phosphoprotein	R68L	64	102	2.62
nsp12	RNA-dependent RNA polymerase	V473F	64	50	1.43	Equivalently V4865F in ORF 1ab
nsp12	RNA-dependent RNA polymerase	E919D	64	45	0.9	Equivalently E5311D in ORF 1ab
nsp13	Zinc-binding domain, NTPase/helicase domain	T141I	64	89	2.14	Equivalently T5465I in ORF 1ab
nsp3	ADRP, Papain-like proteinase, transmembrane domain 1	T275I	64	89	2.14	Equivalently T1093I in ORF 1a
nsp3	ADRP, Papain-like proteinase, transmembrane domain 1	S288N	64	46	1.31	Equivalently S1106N in ORF 1a
nsp3	ADRP, Papain-like proteinase, transmembrane domain 1	A338V	64	64	1.85	Equivalently A1156V in ORF 1a
nsp3	ADRP, Papain-like proteinase, transmembrane domain 1	Q774R	64	43	1.13	Equivalently Q1592R in ORF 1a
nsp3	ADRP, Papain-like proteinase, transmembrane domain 1	E869D	64	45	0.9	Equivalently E1687D in ORF 1a
nsp3	ADRP, Papain-like proteinase, transmembrane domain 1	S1843F	64	155	3.45	Equivalently S2661F in ORF 1a
nsp5	3C-like proteinase	T93I	64	89	2.14	Equivalently T3356I in ORF 1a
nsp5	3C-like proteinase	A94V	64	64	1.85	Equivalently A3357V in ORF 1a
nsp5	3C-like proteinase	G283D	64	94	2.37	Equivalently G3546D in ORF 1a
nsp6	Putative transmembrane domain	Y80C	64	194	2.38	Equivalently Y3649C in ORF 1a
ORF 3a		Y91H	64	83	2.27
ORF 3a		G100V	64	109	2.76
ORF 3a		I158V	64	30	0.85
ORF 7a		R25I	64	98	2.49
ORF 8		F120V	64	50	1.43
S	Surface glycoprotein	F32L	64	22	0.63
S	Surface glycoprotein	G257D	64	94	2.37
N	Nucleocapsid phosphoprotein	A12G	63	60	0.91
N	Nucleocapsid phosphoprotein	D82Y	63	160	3.95
nsp12	RNA-dependent RNA polymerase	D303G	63	94	2.37	Equivalently D4695G in ORF 1ab
nsp12	RNA-dependent RNA polymerase	R721H	63	29	0.82	Equivalently R5113H in ORF 1ab
nsp12	RNA-dependent RNA polymerase	G823S	63	55	0.85	Equivalently G5215S in ORF 1ab
nsp12	RNA-dependent RNA polymerase	H882Y	63	83	2.27	Equivalently H5274Y in ORF 1ab
nsp13	Zinc-binding domain, NTPase/helicase domain	A403S	63	99	0.51	Equivalently A5727S in ORF 1ab
nsp13	Zinc-binding domain, NTPase/helicase domain	R442Q	63	43	1.13	Equivalently R5766Q in ORF 1ab
nsp14	Exonuclease	D222Y	63	160	3.95	Equivalently D6147Y in ORF 1ab
nsp15	EndoRNAse	I211V	63	30	0.85	Equivalently I6663V in ORF 1ab
nsp16	2'-O-ribose methyltransferase	T48I	63	89	2.14	Equivalently T6846I in ORF 1ab
nsp2		R52C	63	180	3.06	Equivalently R232C in ORF 1a
nsp2		K110N	63	94	1.84	Equivalently K290N in ORF 1a
nsp2		P191L	63	98	2.7	Equivalently P371L in ORF 1a
nsp2		M551I	63	10	0.29	Equivalently M731I in ORF 1a
nsp3	ADRP, Papain-like proteinase, transmembrane domain 1	A41V	63	64	1.85	Equivalently A859V in ORF 1a
nsp3	ADRP, Papain-like proteinase, transmembrane domain 1	I580V	63	30	0.85	Equivalently I1398V in ORF 1a
nsp3	ADRP, Papain-like proteinase, transmembrane domain 1	L761F	63	22	0.63	Equivalently L1579F in ORF 1a
nsp3	ADRP, Papain-like proteinase, transmembrane domain 1	M1747I	63	10	0.29	Equivalently M2565I in ORF 1a
nsp5	3C-like proteinase	C16F	63	204	2.24	Equivalently C3279F in ORF 1a
nsp6	Putative transmembrane domain	M92L	63	14	0.41	Equivalently M3661L in ORF 1a
ORF 3a		A59T	63	58	0.9
S	Surface glycoprotein	A653V	63	64	1.85
M	Membrane glycoprotein	D215N	62	23	0.65
N	Nucleocapsid phosphoprotein	R209T	62	71	2.03
nsp1	Leader protein	A138T	62	58	0.9	Equivalently A138T in ORF 1a
nsp1	Leader protein	D147N	62	23	0.65	Equivalently D147N in ORF 1a
nsp12	RNA-dependent RNA polymerase	A526S	62	99	0.51	Equivalently A4918S in ORF 1ab
nsp12	RNA-dependent RNA polymerase	K780R	62	26	0.4	Equivalently K5172R in ORF 1ab
nsp13	Zinc-binding domain, NTPase/helicase domain	S278F	62	155	3.45	Equivalently S5602F in ORF 1ab
nsp15	EndoRNAse	F123Y	62	22	0.48	Equivalently F6575Y in ORF 1ab
nsp15	EndoRNAse	E260K	62	57	1.14	Equivalently E6712K in ORF 1ab
nsp15	EndoRNAse	S288F	62	155	3.45	Equivalently S6740F in ORF 1ab
nsp16	2'-O-ribose methyltransferase	G77R	62	125	3.58	Equivalently G6875R in ORF 1ab
nsp2		A357S	62	99	0.51	Equivalently A537S in ORF 1a
nsp3	ADRP, Papain-like proteinase, transmembrane domain 1	A1105T	62	58	0.9	Equivalently A1923T in ORF 1a
nsp3	ADRP, Papain-like proteinase, transmembrane domain 1	G1440C	62	158	2.22	Equivalently G2258C in ORF 1a
nsp3	ADRP, Papain-like proteinase, transmembrane domain 1	S1485F	62	155	3.45	Equivalently S2303F in ORF 1a
nsp4	Transmembrane domain 2	K165N	62	94	1.84	Equivalently K2928N in ORF 1a
nsp6	Putative transmembrane domain	Y153C	62	194	2.38	Equivalently Y3722C in ORF 1a
nsp8	Putative primase	A27V	62	64	1.85	Equivalently A3969V in ORF 1a
ORF 3a		V163L	62	32	0.91
ORF 6		D6N	62	23	0.65
ORF 7a		K119N	62	94	1.84
ORF 7b		C12Y	62	194	2.38
ORF 7b		L32F	62	22	0.63
ORF 8		E59*	62	-	-
S	Surface glycoprotein	N679K	62	94	1.84
S	Surface glycoprotein	V826L	62	32	0.91
N	Nucleocapsid phosphoprotein	A211S	61	99	0.51
N	Nucleocapsid phosphoprotein	T296I	61	89	2.14
nsp12	RNA-dependent RNA polymerase	A656T	61	58	0.9	Equivalently A5048T in ORF 1ab
nsp13	Zinc-binding domain, NTPase/helicase domain	P47S	61	73	0.56	Equivalently P5371S in ORF 1ab
nsp13	Zinc-binding domain, NTPase/helicase domain	A338V	61	64	1.85	Equivalently A5662V in ORF 1ab
nsp14	Exonuclease	R404I	61	98	2.49	Equivalently R6329I in ORF 1ab
nsp15	EndoRNAse	H234Y	61	83	2.27	Equivalently H6686Y in ORF 1ab
nsp15	EndoRNAse	L331F	61	22	0.63	Equivalently L6783F in ORF 1ab
nsp2		V426F	61	50	1.43	Equivalently V606F in ORF 1a
nsp3	ADRP, Papain-like proteinase, transmembrane domain 1	G251R	61	125	3.58	Equivalently G1069R in ORF 1a
nsp3	ADRP, Papain-like proteinase, transmembrane domain 1	A333V	61	64	1.85	Equivalently A1151V in ORF 1a
nsp3	ADRP, Papain-like proteinase, transmembrane domain 1	L865F	61	22	0.63	Equivalently L1683F in ORF 1a
nsp3	ADRP, Papain-like proteinase, transmembrane domain 1	T1365I	61	89	2.14	Equivalently T2183I in ORF 1a
nsp3	ADRP, Papain-like proteinase, transmembrane domain 1	P1442S	61	73	0.56	Equivalently P2260S in ORF 1a
nsp4	Transmembrane domain 2	R303S	61	109	2.74	Equivalently R3066S in ORF 1a
nsp4	Transmembrane domain 2	L438F	61	22	0.63	Equivalently L3201F in ORF 1a
nsp5	3C-like proteinase	R105L	61	102	2.62	Equivalently R3368L in ORF 1a
nsp5	3C-like proteinase	T190I	61	89	2.14	Equivalently T3453I in ORF 1a
nsp5	3C-like proteinase	L227F	61	22	0.63	Equivalently L3490F in ORF 1a
nsp5	3C-like proteinase	H246Y	61	83	2.27	Equivalently H3509Y in ORF 1a
ORF 3a		V88A	61	64	1.85
ORF 3a		P159S	61	73	0.56
ORF 7a		E22D	61	45	0.9
S	Surface glycoprotein	S50L	61	144	3.04
S	Surface glycoprotein	V483F	61	50	1.43
S	Surface glycoprotein	T747I	61	89	2.14
M	Membrane glycoprotein	A83S	60	99	0.51
N	Nucleocapsid phosphoprotein	R209S	60	109	2.74
[truncated: 30,436 more rows]

## Sheet: 5.Selected Mutations- epi
Virus protein		Replacement	Number of sequences
S	Surface glycoprotein	L10Q	1
S	Surface glycoprotein	L10V	4
S	Surface glycoprotein	L10I	7
S	Surface glycoprotein	V11D	1
S	Surface glycoprotein	V11L	4
S	Surface glycoprotein	V11A	11
S	Surface glycoprotein	V11F	11
S	Surface glycoprotein	V11I	12
S	Surface glycoprotein	S12C	1
S	Surface glycoprotein	S12P	5
S	Surface glycoprotein	S12Y	7
S	Surface glycoprotein	S12F	290
S	Surface glycoprotein	S13T	1
S	Surface glycoprotein	S13N	8
S	Surface glycoprotein	S13I	78
S	Surface glycoprotein	Q14E	1
S	Surface glycoprotein	Q14L	2
S	Surface glycoprotein	Q14*	4
S	Surface glycoprotein	Q14K	6
S	Surface glycoprotein	Q14R	7
S	Surface glycoprotein	Q14H	75
S	Surface glycoprotein	C15G	1
S	Surface glycoprotein	C15Y	1
S	Surface glycoprotein	C15R	4
S	Surface glycoprotein	C15F	41
S	Surface glycoprotein	V16D	2
S	Surface glycoprotein	V16I	4
S	Surface glycoprotein	V16G	6
S	Surface glycoprotein	V16F	24
S	Surface glycoprotein	N17H	1
S	Surface glycoprotein	N17S	1
S	Surface glycoprotein	N17D	4
S	Surface glycoprotein	N17Y	4
S	Surface glycoprotein	N17K	5
S	Surface glycoprotein	L18H	3
S	Surface glycoprotein	L18I	3
S	Surface glycoprotein	L18P	3
S	Surface glycoprotein	L18F	21086
S	Surface glycoprotein	T19P	2
S	Surface glycoprotein	T19S	3
S	Surface glycoprotein	T19A	5
S	Surface glycoprotein	T19R	5
S	Surface glycoprotein	T19I	66
S	Surface glycoprotein	T19K	78
S	Surface glycoprotein	T20N	2
S	Surface glycoprotein	T20S	2
S	Surface glycoprotein	T20P	3
S	Surface glycoprotein	T20A	8
S	Surface glycoprotein	T20I	195
S	Surface glycoprotein	R21*	2
S	Surface glycoprotein	R21S	3
S	Surface glycoprotein	R21G	4
S	Surface glycoprotein	R21T	34
S	Surface glycoprotein	R21K	91
S	Surface glycoprotein	R21I	1630
S	Surface glycoprotein	T22P	1
S	Surface glycoprotein	T22S	2
S	Surface glycoprotein	T22A	7
S	Surface glycoprotein	T22N	50
S	Surface glycoprotein	T22I	166
S	Surface glycoprotein	F65I	1
S	Surface glycoprotein	F65V	1
S	Surface glycoprotein	F65L	5
S	Surface glycoprotein	H66P	1
S	Surface glycoprotein	H66Q	1
S	Surface glycoprotein	H66R	3
S	Surface glycoprotein	H66L	4
S	Surface glycoprotein	A67G	1
S	Surface glycoprotein	A67T	8
S	Surface glycoprotein	A67S	119
S	Surface glycoprotein	A67V	143
S	Surface glycoprotein	I68R	1
S	Surface glycoprotein	I68V	1
S	Surface glycoprotein	I68K	3
S	Surface glycoprotein	I68L	3
S	Surface glycoprotein	I68M	6
S	Surface glycoprotein	I68T	28
S	Surface glycoprotein	H69L	1
S	Surface glycoprotein	H69D	3
S	Surface glycoprotein	H69Q	5
S	Surface glycoprotein	H69R	7
S	Surface glycoprotein	H69Y	108
S	Surface glycoprotein	V70G	1
S	Surface glycoprotein	V70L	6
S	Surface glycoprotein	V70A	12
S	Surface glycoprotein	V70I	21
S	Surface glycoprotein	V70F	90
S	Surface glycoprotein	S71Y	1
S	Surface glycoprotein	S71F	41
S	Surface glycoprotein	S71P	78
S	Surface glycoprotein	G72A	1
S	Surface glycoprotein	G72W	7
S	Surface glycoprotein	G72V	15
S	Surface glycoprotein	G72E	23
S	Surface glycoprotein	G72R	31
S	Surface glycoprotein	T73S	1
S	Surface glycoprotein	T73A	3
S	Surface glycoprotein	T73N	3
S	Surface glycoprotein	T73I	71
S	Surface glycoprotein	N74Y	1
S	Surface glycoprotein	N74D	6
S	Surface glycoprotein	N74K	7
S	Surface glycoprotein	G75A	4
S	Surface glycoprotein	G75S	4
S	Surface glycoprotein	G75C	6
S	Surface glycoprotein	G75D	25
S	Surface glycoprotein	G75R	30
S	Surface glycoprotein	G75V	180
S	Surface glycoprotein	W258*	2
S	Surface glycoprotein	W258C	19
S	Surface glycoprotein	W258L	135
S	Surface glycoprotein	W258R	19
S	Surface glycoprotein	W258S	4
S	Surface glycoprotein	T259I	9
S	Surface glycoprotein	T259K	3
S	Surface glycoprotein	T259R	1
S	Surface glycoprotein	T259S	2
S	Surface glycoprotein	A260D	3
S	Surface glycoprotein	A260S	10
S	Surface glycoprotein	A260T	4
S	Surface glycoprotein	A260V	12
S	Surface glycoprotein	G261A	3
S	Surface glycoprotein	G261C	17
S	Surface glycoprotein	G261D	14
S	Surface glycoprotein	G261F	1
S	Surface glycoprotein	G261R	39
S	Surface glycoprotein	G261S	75
S	Surface glycoprotein	G261V	385
S	Surface glycoprotein	A262D	10
S	Surface glycoprotein	A262G	59
S	Surface glycoprotein	A262P	2
S	Surface glycoprotein	A262S	2408
S	Surface glycoprotein	A262T	21
S	Surface glycoprotein	A262V	10
S	Surface glycoprotein	A263E	9
S	Surface glycoprotein	A263S	22
S	Surface glycoprotein	A263T	34
S	Surface glycoprotein	A263V	15
S	Surface glycoprotein	A264D	1
S	Surface glycoprotein	A264G	1
S	Surface glycoprotein	A264P	1
S	Surface glycoprotein	A264S	9
S	Surface glycoprotein	A264T	5
S	Surface glycoprotein	A264V	5
S	Surface glycoprotein	Y265C	5
S	Surface glycoprotein	Y265F	2
S	Surface glycoprotein	Y265H	3
S	Surface glycoprotein	Y265N	2
S	Surface glycoprotein	Y265S	2
S	Surface glycoprotein	Y266*	6
S	Surface glycoprotein	Y266C	4
S	Surface glycoprotein	Y266F	1
S	Surface glycoprotein	Y266H	8
S	Surface glycoprotein	Y266S	3
M	Membrane glycoprotein	R105C	2
M	Membrane glycoprotein	T106M	5
M	Membrane glycoprotein	R107C	3
M	Membrane glycoprotein	R107L	4
M	Membrane glycoprotein	R107H	47
M	Membrane glycoprotein	S108P	1
M	Membrane glycoprotein	S108T	1
M	Membrane glycoprotein	M109L	1
M	Membrane glycoprotein	M109T	1
M	Membrane glycoprotein	M109V	2
M	Membrane glycoprotein	M109I	125
M	Membrane glycoprotein	S111L	2
M	Membrane glycoprotein	F112L	1
M	Membrane glycoprotein	P114S	1
M	Membrane glycoprotein	P114L	2
M	Membrane glycoprotein	E115K	1
M	Membrane glycoprotein	T116I	2
M	Membrane glycoprotein	N117H	1
M	Membrane glycoprotein	N117I	1
M	Membrane glycoprotein	I168T	2
M	Membrane glycoprotein	I168V	2
M	Membrane glycoprotein	I168L	137
M	Membrane glycoprotein	T169A	1
M	Membrane glycoprotein	T169S	3
M	Membrane glycoprotein	V170A	1
M	Membrane glycoprotein	V170L	2
M	Membrane glycoprotein	V170F	3
M	Membrane glycoprotein	V170I	4
M	Membrane glycoprotein	A171V	2
M	Membrane glycoprotein	A171S	31
M	Membrane glycoprotein	T172R	1
M	Membrane glycoprotein	T172S	1
M	Membrane glycoprotein	S173A	1
M	Membrane glycoprotein	S173P	1
M	Membrane glycoprotein	S173T	1
M	Membrane glycoprotein	S173K	10
M	Membrane glycoprotein	S173*	35
M	Membrane glycoprotein	R174L	2
M	Membrane glycoprotein	T175A	1
M	Membrane glycoprotein	T175I	1
M	Membrane glycoprotein	T175K	1
M	Membrane glycoprotein	T175S	1
M	Membrane glycoprotein	T175M	1244
M	Membrane glycoprotein	L176P	4
M	Membrane glycoprotein	L176F	5
M	Membrane glycoprotein	S177A	1
M	Membrane glycoprotein	S177F	2
M	Membrane glycoprotein	S177P	2
M	Membrane glycoprotein	Y178*	1
M	Membrane glycoprotein	Y178H	2
M	Membrane glycoprotein	Y178S	2
M	Membrane glycoprotein	Y179F	1
M	Membrane glycoprotein	K180N	1
M	Membrane glycoprotein	K180T	1
M	Membrane glycoprotein	K180R	14
M	Membrane glycoprotein	L181S	1
M	Membrane glycoprotein	L181F	4
M	Membrane glycoprotein	G182A	1
M	Membrane glycoprotein	G182R	1
M	Membrane glycoprotein	G182V	1
M	Membrane glycoprotein	G182*	2
M	Membrane glycoprotein	A183V	1
M	Membrane glycoprotein	S184L	1
M	Membrane glycoprotein	Q185*	1
M	Membrane glycoprotein	Q185R	5
M	Membrane glycoprotein	Q185H	7
M	Membrane glycoprotein	R186P	1
M	Membrane glycoprotein	R186C	14
M	Membrane glycoprotein	V187A	1
M	Membrane glycoprotein	V187L	1
M	Membrane glycoprotein	A188S	12
M	Membrane glycoprotein	A188T	34
M	Membrane glycoprotein	G189D	1
M	Membrane glycoprotein	G189V	3
M	Membrane glycoprotein	G189C	5
M	Membrane glycoprotein	D190H	1
M	Membrane glycoprotein	D190E	2
M	Membrane glycoprotein	D190N	2
M	Membrane glycoprotein	D190Y	4
M	Membrane glycoprotein	S191*	1
M	Membrane glycoprotein	S191P	1
M	Membrane glycoprotein	S191T	1
M	Membrane glycoprotein	S191L	3
M	Membrane glycoprotein	G192C	1
M	Membrane glycoprotein	G192V	4
M	Membrane glycoprotein	A194P	1
M	Membrane glycoprotein	A194V	1
M	Membrane glycoprotein	A195T	1
M	Membrane glycoprotein	A195V	4
N	Nucleocapsid phosphoprotein	R177*	1
N	Nucleocapsid phosphoprotein	R177S	2
N	Nucleocapsid phosphoprotein	R177G	4
N	Nucleocapsid phosphoprotein	R177K	7
N	Nucleocapsid phosphoprotein	G178A	1
N	Nucleocapsid phosphoprotein	G178C	3
N	Nucleocapsid phosphoprotein	G178V	12
N	Nucleocapsid phosphoprotein	G178S	20
N	Nucleocapsid phosphoprotein	G178D	21
N	Nucleocapsid phosphoprotein	G179D	13
N	Nucleocapsid phosphoprotein	G179V	37
N	Nucleocapsid phosphoprotein	G179S	51
N	Nucleocapsid phosphoprotein	G179C	59
N	Nucleocapsid phosphoprotein	S180G	6
N	Nucleocapsid phosphoprotein	S180C	7
N	Nucleocapsid phosphoprotein	S180R	7
N	Nucleocapsid phosphoprotein	S180N	10
N	Nucleocapsid phosphoprotein	S180T	55
N	Nucleocapsid phosphoprotein	S180I	269
N	Nucleocapsid phosphoprotein	Q181K	1
N	Nucleocapsid phosphoprotein	Q181L	2
N	Nucleocapsid phosphoprotein	Q181E	3
N	Nucleocapsid phosphoprotein	Q181*	4
N	Nucleocapsid phosphoprotein	Q181R	4
N	Nucleocapsid phosphoprotein	Q181H	8
N	Nucleocapsid phosphoprotein	A182P	2
N	Nucleocapsid phosphoprotein	A182V	6
N	Nucleocapsid phosphoprotein	A182T	12
N	Nucleocapsid phosphoprotein	A182S	485
N	Nucleocapsid phosphoprotein	S183T	2
N	Nucleocapsid phosphoprotein	S183P	4
N	Nucleocapsid phosphoprotein	S183F	15
N	Nucleocapsid phosphoprotein	S183Y	1480
N	Nucleocapsid phosphoprotein	S184Y	1
N	Nucleocapsid phosphoprotein	S184A	4
N	Nucleocapsid phosphoprotein	S184F	6
N	Nucleocapsid phosphoprotein	S184P	11
N	Nucleocapsid phosphoprotein	R185S	1
N	Nucleocapsid phosphoprotein	R185P	8
N	Nucleocapsid phosphoprotein	R185H	19
N	Nucleocapsid phosphoprotein	R185L	26
N	Nucleocapsid phosphoprotein	R185C	139
N	Nucleocapsid phosphoprotein	S186T	1
N	Nucleocapsid phosphoprotein	S186P	12
N	Nucleocapsid phosphoprotein	S186F	38
N	Nucleocapsid phosphoprotein	S186Y	556
N	Nucleocapsid phosphoprotein	S187A	1
N	Nucleocapsid phosphoprotein	S187P	2
N	Nucleocapsid phosphoprotein	S187L	574
N	Nucleocapsid phosphoprotein	S188P	41
N	Nucleocapsid phosphoprotein	S188L	986
N	Nucleocapsid phosphoprotein	R189C	2
N	Nucleocapsid phosphoprotein	R189L	4
N	Nucleocapsid phosphoprotein	R189H	13
N	Nucleocapsid phosphoprotein	S190T	1
N	Nucleocapsid phosphoprotein	S190N	5
N	Nucleocapsid phosphoprotein	S190R	37
N	Nucleocapsid phosphoprotein	S190G	131
N	Nucleocapsid phosphoprotein	S190I	960
N	Nucleocapsid phosphoprotein	R191G	1
N	Nucleocapsid phosphoprotein	R191S	5
N	Nucleocapsid phosphoprotein	R191H	25
N	Nucleocapsid phosphoprotein	R191C	42
N	Nucleocapsid phosphoprotein	R191L	99
N	Nucleocapsid phosphoprotein	N192S	3
N	Nucleocapsid phosphoprotein	N192T	3
N	Nucleocapsid phosphoprotein	N192D	4
N	Nucleocapsid phosphoprotein	N192Y	6
N	Nucleocapsid phosphoprotein	N192K	68
N	Nucleocapsid phosphoprotein	S193C	2
N	Nucleocapsid phosphoprotein	S193G	3
N	Nucleocapsid phosphoprotein	S193N	41
N	Nucleocapsid phosphoprotein	S193T	74
N	Nucleocapsid phosphoprotein	S193I	991
N	Nucleocapsid phosphoprotein	S194*	1
N	Nucleocapsid phosphoprotein	S194T	1
N	Nucleocapsid phosphoprotein	S194P	8
N	Nucleocapsid phosphoprotein	S194A	52
N	Nucleocapsid phosphoprotein	S194L	12810
N	Nucleocapsid phosphoprotein	R195L	1
N	Nucleocapsid phosphoprotein	R195S	4
N	Nucleocapsid phosphoprotein	R195N	7
N	Nucleocapsid phosphoprotein	R195G	9
N	Nucleocapsid phosphoprotein	R195T	22
N	Nucleocapsid phosphoprotein	R195K	74
N	Nucleocapsid phosphoprotein	R195I	216
N	Nucleocapsid phosphoprotein	N196H	1
N	Nucleocapsid phosphoprotein	N196T	2
N	Nucleocapsid phosphoprotein	N196D	4
N	Nucleocapsid phosphoprotein	N196K	5
N	Nucleocapsid phosphoprotein	N196Y	8
N	Nucleocapsid phosphoprotein	N196I	21
N	Nucleocapsid phosphoprotein	N196S	267
N	Nucleocapsid phosphoprotein	S197F	1
N	Nucleocapsid phosphoprotein	S197T	1
N	Nucleocapsid phosphoprotein	S197*	2
N	Nucleocapsid phosphoprotein	S197P	6
N	Nucleocapsid phosphoprotein	S197L	1850
N	Nucleocapsid phosphoprotein	T198A	2
N	Nucleocapsid phosphoprotein	T198I	122
N	Nucleocapsid phosphoprotein	P199R	1
N	Nucleocapsid phosphoprotein	P199T	4
N	Nucleocapsid phosphoprotein	P199Q	15
N	Nucleocapsid phosphoprotein	P199S	525
N	Nucleocapsid phosphoprotein	P199L	3935
N	Nucleocapsid phosphoprotein	G200V	2
N	Nucleocapsid phosphoprotein	G200C	10
N	Nucleocapsid phosphoprotein	G200D	15
N	Nucleocapsid phosphoprotein	G200S	34
N	Nucleocapsid phosphoprotein	S201C	6
N	Nucleocapsid phosphoprotein	S201G	9
N	Nucleocapsid phosphoprotein	S201N	11
N	Nucleocapsid phosphoprotein	S201I	55
N	Nucleocapsid phosphoprotein	S202G	8
N	Nucleocapsid phosphoprotein	S202R	15
N	Nucleocapsid phosphoprotein	S202I	22
N	Nucleocapsid phosphoprotein	S202C	30
N	Nucleocapsid phosphoprotein	S202N	981
N	Nucleocapsid phosphoprotein	R203I	1
N	Nucleocapsid phosphoprotein	R203W	1
N	Nucleocapsid phosphoprotein	R203N	2
N	Nucleocapsid phosphoprotein	R203T	2
N	Nucleocapsid phosphoprotein	R203G	13
N	Nucleocapsid phosphoprotein	R203S	65
N	Nucleocapsid phosphoprotein	R203M	108
N	Nucleocapsid phosphoprotein	R203K	89402
N	Nucleocapsid phosphoprotein	G204*	1
N	Nucleocapsid phosphoprotein	G204T	1
N	Nucleocapsid phosphoprotein	G204E	2
N	Nucleocapsid phosphoprotein	G204P	4
N	Nucleocapsid phosphoprotein	G204Q	6
N	Nucleocapsid phosphoprotein	G204V	12
N	Nucleocapsid phosphoprotein	G204L	492
N	Nucleocapsid phosphoprotein	G204R	88786
N	Nucleocapsid phosphoprotein	T205A	4
N	Nucleocapsid phosphoprotein	T205S	6
N	Nucleocapsid phosphoprotein	T205P	16
N	Nucleocapsid phosphoprotein	T205N	32
N	Nucleocapsid phosphoprotein	T205I	1684
N	Nucleocapsid phosphoprotein	S206A	1
N	Nucleocapsid phosphoprotein	S206C	1
N	Nucleocapsid phosphoprotein	S206T	1
N	Nucleocapsid phosphoprotein	S206Y	1
N	Nucleocapsid phosphoprotein	S206L	113
N	Nucleocapsid phosphoprotein	S206P	139
N	Nucleocapsid phosphoprotein	S206F	167
N	Nucleocapsid phosphoprotein	P207R	2
N	Nucleocapsid phosphoprotein	P207H	5
N	Nucleocapsid phosphoprotein	P207Q	9
N	Nucleocapsid phosphoprotein	P207T	11
N	Nucleocapsid phosphoprotein	P207L	141
N	Nucleocapsid phosphoprotein	P207S	142
N	Nucleocapsid phosphoprotein	A208F	1
N	Nucleocapsid phosphoprotein	A208P	7
N	Nucleocapsid phosphoprotein	A208T	9
N	Nucleocapsid phosphoprotein	A208V	27
N	Nucleocapsid phosphoprotein	A208S	45
N	Nucleocapsid phosphoprotein	A208G	328
N	Nucleocapsid phosphoprotein	R209*	2
N	Nucleocapsid phosphoprotein	R209G	5
N	Nucleocapsid phosphoprotein	R209S	60
N	Nucleocapsid phosphoprotein	R209T	62
N	Nucleocapsid phosphoprotein	R209K	174
N	Nucleocapsid phosphoprotein	R209I	677
N	Nucleocapsid phosphoprotein	M210L	1
N	Nucleocapsid phosphoprotein	M210K	2
N	Nucleocapsid phosphoprotein	M210V	3
N	Nucleocapsid phosphoprotein	M210T	14
N	Nucleocapsid phosphoprotein	M210I	595
N	Nucleocapsid phosphoprotein	A211D	1
N	Nucleocapsid phosphoprotein	A211P	1
N	Nucleocapsid phosphoprotein	A211T	10
N	Nucleocapsid phosphoprotein	A211S	61
N	Nucleocapsid phosphoprotein	A211V	233
N	Nucleocapsid phosphoprotein	G212A	1
N	Nucleocapsid phosphoprotein	G212R	1
N	Nucleocapsid phosphoprotein	G212D	2
N	Nucleocapsid phosphoprotein	G212S	4
N	Nucleocapsid phosphoprotein	G212V	138
N	Nucleocapsid phosphoprotein	G212C	170
N	Nucleocapsid phosphoprotein	N213D	1
N	Nucleocapsid phosphoprotein	N213T	1
N	Nucleocapsid phosphoprotein	N213S	6
N	Nucleocapsid phosphoprotein	N213H	9
N	Nucleocapsid phosphoprotein	N213I	10
N	Nucleocapsid phosphoprotein	N213Y	19
N	Nucleocapsid phosphoprotein	G214S	3
N	Nucleocapsid phosphoprotein	G214V	9
N	Nucleocapsid phosphoprotein	G214C	27
N	Nucleocapsid phosphoprotein	G215A	2
N	Nucleocapsid phosphoprotein	G215D	12
N	Nucleocapsid phosphoprotein	G215C	26
N	Nucleocapsid phosphoprotein	G215S	43
N	Nucleocapsid phosphoprotein	G215V	70
N	Nucleocapsid phosphoprotein	N354H	2
N	Nucleocapsid phosphoprotein	N354S	7
N	Nucleocapsid phosphoprotein	K355E	1
N	Nucleocapsid phosphoprotein	K355M	1
N	Nucleocapsid phosphoprotein	K355R	3
N	Nucleocapsid phosphoprotein	K355N	6
N	Nucleocapsid phosphoprotein	H356Y	2
N	Nucleocapsid phosphoprotein	I357F	1
N	Nucleocapsid phosphoprotein	I357V	8
N	Nucleocapsid phosphoprotein	D358A	1
N	Nucleocapsid phosphoprotein	D358E	1
N	Nucleocapsid phosphoprotein	D358G	1
N	Nucleocapsid phosphoprotein	D358V	1
N	Nucleocapsid phosphoprotein	D358Y	1
N	Nucleocapsid phosphoprotein	D358N	5
N	Nucleocapsid phosphoprotein	A359T	11
N	Nucleocapsid phosphoprotein	A359V	11
N	Nucleocapsid phosphoprotein	A359S	358
N	Nucleocapsid phosphoprotein	Y360C	1
N	Nucleocapsid phosphoprotein	Y360S	1
N	Nucleocapsid phosphoprotein	K361I	1
N	Nucleocapsid phosphoprotein	K361N	1
N	Nucleocapsid phosphoprotein	K361R	3
N	Nucleocapsid phosphoprotein	T362A	7
N	Nucleocapsid phosphoprotein	T362K	27
N	Nucleocapsid phosphoprotein	T362I	231
N	Nucleocapsid phosphoprotein	F363S	9
N	Nucleocapsid phosphoprotein	F363V	14
N	Nucleocapsid phosphoprotein	F363L	15
N	Nucleocapsid phosphoprotein	P364R	2
N	Nucleocapsid phosphoprotein	P364T	2
N	Nucleocapsid phosphoprotein	P364Q	10
N	Nucleocapsid phosphoprotein	P364S	38
N	Nucleocapsid phosphoprotein	P364L	108
N	Nucleocapsid phosphoprotein	P365Q	2
N	Nucleocapsid phosphoprotein	P365R	17
N	Nucleocapsid phosphoprotein	P365L	79
N	Nucleocapsid phosphoprotein	P365S	2790
N	Nucleocapsid phosphoprotein	T366K	1
N	Nucleocapsid phosphoprotein	T366A	9
N	Nucleocapsid phosphoprotein	T366P	18
N	Nucleocapsid phosphoprotein	T366R	75
N	Nucleocapsid phosphoprotein	T366I	166
N	Nucleocapsid phosphoprotein	E367R	1
N	Nucleocapsid phosphoprotein	E367Q	2
N	Nucleocapsid phosphoprotein	E367*	3
N	Nucleocapsid phosphoprotein	E367V	9
N	Nucleocapsid phosphoprotein	E367K	14
N	Nucleocapsid phosphoprotein	E367G	15
N	Nucleocapsid phosphoprotein	E367D	56
N	Nucleocapsid phosphoprotein	P368K	1
N	Nucleocapsid phosphoprotein	P368A	4
N	Nucleocapsid phosphoprotein	P368Q	4
N	Nucleocapsid phosphoprotein	P368H	9
N	Nucleocapsid phosphoprotein	P368L	27
N	Nucleocapsid phosphoprotein	P368S	78
N	Nucleocapsid phosphoprotein	K369*	2
N	Nucleocapsid phosphoprotein	K369Q	2
N	Nucleocapsid phosphoprotein	K369N	6
N	Nucleocapsid phosphoprotein	K369I	7
N	Nucleocapsid phosphoprotein	K369R	7
N	Nucleocapsid phosphoprotein	K369T	14
N	Nucleocapsid phosphoprotein	K370*	1
N	Nucleocapsid phosphoprotein	K370M	2
N	Nucleocapsid phosphoprotein	K370E	3
N	Nucleocapsid phosphoprotein	K370R	3
N	Nucleocapsid phosphoprotein	K370Q	5
N	Nucleocapsid phosphoprotein	K370N	41
N	Nucleocapsid phosphoprotein	D371H	1
N	Nucleocapsid phosphoprotein	D371A	2
N	Nucleocapsid phosphoprotein	D371V	8
N	Nucleocapsid phosphoprotein	D371E	23
N	Nucleocapsid phosphoprotein	D371N	38
N	Nucleocapsid phosphoprotein	D371G	45
N	Nucleocapsid phosphoprotein	D371Y	74
N	Nucleocapsid phosphoprotein	K372S	1
N	Nucleocapsid phosphoprotein	K372N	2
N	Nucleocapsid phosphoprotein	K372E	3
N	Nucleocapsid phosphoprotein	K372R	8
N	Nucleocapsid phosphoprotein	K373E	1
N	Nucleocapsid phosphoprotein	K373M	1
N	Nucleocapsid phosphoprotein	K373Q	2
N	Nucleocapsid phosphoprotein	K373R	70
N	Nucleocapsid phosphoprotein	K373N	121
N	Nucleocapsid phosphoprotein	K374T	1
N	Nucleocapsid phosphoprotein	K374M	2
N	Nucleocapsid phosphoprotein	K374E	5
N	Nucleocapsid phosphoprotein	K374Q	5
N	Nucleocapsid phosphoprotein	K374N	66
N	Nucleocapsid phosphoprotein	K374R	255
N	Nucleocapsid phosphoprotein	K375R	4
N	Nucleocapsid phosphoprotein	K375N	11
N	Nucleocapsid phosphoprotein	K375Q	11
N	Nucleocapsid phosphoprotein	K375E	20
N	Nucleocapsid phosphoprotein	A376P	1
N	Nucleocapsid phosphoprotein	A376V	4
N	Nucleocapsid phosphoprotein	A376S	9
N	Nucleocapsid phosphoprotein	A376T	4477
N	Nucleocapsid phosphoprotein	D377H	2
N	Nucleocapsid phosphoprotein	D377N	2
N	Nucleocapsid phosphoprotein	D377V	5
N	Nucleocapsid phosphoprotein	D377A	7
N	Nucleocapsid phosphoprotein	D377G	44
N	Nucleocapsid phosphoprotein	D377Y	2663
N	Nucleocapsid phosphoprotein	E378D	4
N	Nucleocapsid phosphoprotein	E378G	5
N	Nucleocapsid phosphoprotein	E378V	6
N	Nucleocapsid phosphoprotein	E378K	13
N	Nucleocapsid phosphoprotein	E378*	15
N	Nucleocapsid phosphoprotein	E378A	45
N	Nucleocapsid phosphoprotein	E378Q	99
N	Nucleocapsid phosphoprotein	T379S	1
N	Nucleocapsid phosphoprotein	T379P	2
N	Nucleocapsid phosphoprotein	T379A	3
N	Nucleocapsid phosphoprotein	T379N	4
N	Nucleocapsid phosphoprotein	T379I	230
N	Nucleocapsid phosphoprotein	Q380E	1
N	Nucleocapsid phosphoprotein	Q380K	2
N	Nucleocapsid phosphoprotein	Q380*	3
N	Nucleocapsid phosphoprotein	Q380H	5
N	Nucleocapsid phosphoprotein	Q380P	5
N	Nucleocapsid phosphoprotein	Q380R	5
N	Nucleocapsid phosphoprotein	Q380L	22
N	Nucleocapsid phosphoprotein	A381P	1
N	Nucleocapsid phosphoprotein	A381T	27
N	Nucleocapsid phosphoprotein	A381S	37
N	Nucleocapsid phosphoprotein	A381V	47
N	Nucleocapsid phosphoprotein	L382I	1
N	Nucleocapsid phosphoprotein	L382K	1
N	Nucleocapsid phosphoprotein	L382F	2
N	Nucleocapsid phosphoprotein	L382S	8
N	Nucleocapsid phosphoprotein	P383Q	8
N	Nucleocapsid phosphoprotein	P383S	293
N	Nucleocapsid phosphoprotein	P383L	596
N	Nucleocapsid phosphoprotein	Q384L	4
N	Nucleocapsid phosphoprotein	Q384R	5
N	Nucleocapsid phosphoprotein	Q384H	318
N	Nucleocapsid phosphoprotein	R385G	3
N	Nucleocapsid phosphoprotein	R385S	3
N	Nucleocapsid phosphoprotein	R385T	5
N	Nucleocapsid phosphoprotein	R385I	50
N	Nucleocapsid phosphoprotein	R385K	1323
N	Nucleocapsid phosphoprotein	Q386K	2
N	Nucleocapsid phosphoprotein	Q386P	2
N	Nucleocapsid phosphoprotein	Q386R	5
N	Nucleocapsid phosphoprotein	Q386*	6
N	Nucleocapsid phosphoprotein	Q386L	6
N	Nucleocapsid phosphoprotein	Q386H	14
N	Nucleocapsid phosphoprotein	K387E	1
N	Nucleocapsid phosphoprotein	K387T	1
N	Nucleocapsid phosphoprotein	K387R	34
N	Nucleocapsid phosphoprotein	K387N	47
N	Nucleocapsid phosphoprotein	K388*	1
N	Nucleocapsid phosphoprotein	K388E	1
N	Nucleocapsid phosphoprotein	K388I	1
N	Nucleocapsid phosphoprotein	K388S	1
N	Nucleocapsid phosphoprotein	K388R	6
N	Nucleocapsid phosphoprotein	Q389*	1
N	Nucleocapsid phosphoprotein	Q389E	1
N	Nucleocapsid phosphoprotein	Q389K	1
N	Nucleocapsid phosphoprotein	Q389L	20
N	Nucleocapsid phosphoprotein	Q389H	74
N	Nucleocapsid phosphoprotein	Q390L	2
N	Nucleocapsid phosphoprotein	Q390R	2
N	Nucleocapsid phosphoprotein	Q390H	5
N	Nucleocapsid phosphoprotein	Q390*	6
N	Nucleocapsid phosphoprotein	Q390K	6
N	Nucleocapsid phosphoprotein	Q390E	9
N	Nucleocapsid phosphoprotein	T391S	1
N	Nucleocapsid phosphoprotein	T391A	4
N	Nucleocapsid phosphoprotein	T391I	243
N	Nucleocapsid phosphoprotein	V392A	1
N	Nucleocapsid phosphoprotein	V392L	38
N	Nucleocapsid phosphoprotein	T393N	1
N	Nucleocapsid phosphoprotein	T393P	1
N	Nucleocapsid phosphoprotein	T393I	242
N	Nucleocapsid phosphoprotein	L394I	1
N	Nucleocapsid phosphoprotein	L394P	1
N	Nucleocapsid phosphoprotein	L394F	4
N	Nucleocapsid phosphoprotein	L395P	3
N	Nucleocapsid phosphoprotein	L395F	6
N	Nucleocapsid phosphoprotein	P396H	2
N	Nucleocapsid phosphoprotein	P396L	2
N	Nucleocapsid phosphoprotein	P396S	26
N	Nucleocapsid phosphoprotein	A397G	3
N	Nucleocapsid phosphoprotein	A397T	6
N	Nucleocapsid phosphoprotein	A397P	8
N	Nucleocapsid phosphoprotein	A397V	15
N	Nucleocapsid phosphoprotein	A397S	16
N	Nucleocapsid phosphoprotein	A398L	1
N	Nucleocapsid phosphoprotein	A398P	1
N	Nucleocapsid phosphoprotein	A398S	37
N	Nucleocapsid phosphoprotein	A398V	3629
N	Nucleocapsid phosphoprotein	D399E	1
N	Nucleocapsid phosphoprotein	D399V	7
N	Nucleocapsid phosphoprotein	D399N	20
N	Nucleocapsid phosphoprotein	D399H	34
N	Nucleocapsid phosphoprotein	D399Y	82
N	Nucleocapsid phosphoprotein	L400S	1
N	Nucleocapsid phosphoprotein	L400W	1
N	Nucleocapsid phosphoprotein	L400F	3
ORF 10		R20G	1
ORF 10		R20K	4
ORF 10		R20T	4
ORF 10		R20*	5
ORF 10		R20I	123
ORF 10		M21T	4
ORF 10		M21V	4
ORF 10		M21I	17
ORF 10		M21K	20
ORF 10		N22K	1
ORF 10		N22I	2
ORF 10		N22T	3
ORF 10		N22Y	3
ORF 10		N22S	7
ORF 10		N22D	11
ORF 10		S23C	1
ORF 10		S23P	1
ORF 10		S23F	241
ORF 10		R24G	1
ORF 10		R24H	8
ORF 10		R24P	25
ORF 10		R24C	181
ORF 10		R24L	198
ORF 10		N25D	1
ORF 10		N25S	1
ORF 10		Y26H	8
ORF 10		I27L	1
ORF 10		I27V	1
ORF 10		I27M	2
ORF 10		I27T	10
ORF 10		A28P	1
ORF 10		A28T	2
ORF 10		A28S	23
ORF 10		A28V	142
ORF 10		Q29H	2
ORF 10		Q29L	3
ORF 10		Q29R	3
ORF 10		Q29*	165
ORF 10		V30S	1
ORF 10		V30I	2
ORF 10		V30A	5
ORF 10		V30L	43701
ORF 10		D31A	1
ORF 10		D31V	1
ORF 10		D31N	2
ORF 10		D31G	4
ORF 10		D31H	5
ORF 10		D31Y	146
ORF 10		V32E	2
ORF 10		V32A	3
ORF 10		V32L	18
ORF 10		V33I	1
ORF 10		V33A	4
ORF 10		V33F	9
ORF 10		N34D	1
ORF 10		N34T	1
ORF 10		N34H	2
ORF 10		N34Y	4
ORF 10		F35I	1
ORF 10		F35C	2
ORF 10		F35L	2
ORF 10		F35S	37
ORF 10		N36Y	1
ORF 10		N36D	2
ORF 10		N36S	2
ORF 10		N36K	4
ORF 10		L37H	1
ORF 10		L37P	2
ORF 10		L37V	3
ORF 10		L37I	5
ORF 10		L37F	97
ORF 10		T38R	1
ORF 10		T38A	3
ORF 10		T38I	44
ORF 3a		K66E	1
ORF 3a		K66Q	1
ORF 3a		K66R	2
ORF 3a		K66T	2
ORF 3a		K66I	18
ORF 3a		K66N	51
ORF 3a		K67T	1
ORF 3a		K67E	5
ORF 3a		K67M	5
ORF 3a		K67R	6
ORF 3a		K67N	128
ORF 3a		R68T	4
ORF 3a		R68S	11
ORF 3a		R68K	29
ORF 3a		R68I	153
ORF 3a		W69*	1
ORF 3a		W69G	2
ORF 3a		W69R	4
ORF 3a		W69S	4
ORF 3a		W69C	94
ORF 3a		W69L	253
ORF 3a		Q70K	1
ORF 3a		Q70L	2
ORF 3a		Q70*	3
ORF 3a		Q70R	3
ORF 3a		L71I	1
ORF 3a		A72P	2
ORF 3a		A72T	5
ORF 3a		A72V	5
ORF 3a		A72S	807
ORF 3a		L73V	1
ORF 3a		L73P	2
ORF 3a		L73I	9
ORF 3a		L73F	24
ORF 3a		S74Y	2
ORF 3a		S74A	4
ORF 3a		S74P	11
ORF 3a		S74F	151
ORF 3a		K75*	1
ORF 3a		K75T	1
ORF 3a		K75M	5
ORF 3a		K75E	12
ORF 3a		K75R	13
ORF 3a		K75N	2659
ORF 3a		G76C	1
ORF 3a		G76V	5
ORF 3a		G76S	17
ORF 3a		V77G	1
ORF 3a		V77L	4
ORF 3a		V77A	11
ORF 3a		V77I	22
ORF 3a		V77F	304
ORF 3a		H78P	1
ORF 3a		H78R	1
ORF 3a		H78N	3
ORF 3a		H78D	4
ORF 3a		H78Q	4
ORF 3a		H78Y	667
ORF 3a		F79S	2
ORF 3a		F79L	4
ORF 3a		V80D	1
ORF 3a		V80A	5
ORF 3a		V80L	5
ORF 3a		V80I	7
ORF 3a		V80F	13
nsp3	ADRP, Papain-like proteinase, transmembrane domain 1	T619A	nsp3
nsp3	ADRP, Papain-like proteinase, transmembrane domain 1	T619I	nsp3
nsp3	ADRP, Papain-like proteinase, transmembrane domain 1	L620P	nsp3
nsp3	ADRP, Papain-like proteinase, transmembrane domain 1	L620R	nsp3
nsp3	ADRP, Papain-like proteinase, transmembrane domain 1	L620F	nsp3
nsp3	ADRP, Papain-like proteinase, transmembrane domain 1	N621H	nsp3
nsp3	ADRP, Papain-like proteinase, transmembrane domain 1	D622A	nsp3
nsp3	ADRP, Papain-like proteinase, transmembrane domain 1	D622E	nsp3
nsp3	ADRP, Papain-like proteinase, transmembrane domain 1	D622Y	nsp3
nsp3	ADRP, Papain-like proteinase, transmembrane domain 1	D622G	nsp3
nsp3	ADRP, Papain-like proteinase, transmembrane domain 1	D622N	nsp3
nsp3	ADRP, Papain-like proteinase, transmembrane domain 1	L623I	nsp3
nsp3	ADRP, Papain-like proteinase, transmembrane domain 1	L623Q	nsp3
nsp3	ADRP, Papain-like proteinase, transmembrane domain 1	N624K	nsp3
nsp3	ADRP, Papain-like proteinase, transmembrane domain 1	N624S	nsp3
nsp3	ADRP, Papain-like proteinase, transmembrane domain 1	N624H	nsp3
nsp3	ADRP, Papain-like proteinase, transmembrane domain 1	E625K	nsp3
nsp3	ADRP, Papain-like proteinase, transmembrane domain 1	T626A	nsp3
nsp3	ADRP, Papain-like proteinase, transmembrane domain 1	T626P	nsp3
nsp3	ADRP, Papain-like proteinase, transmembrane domain 1	T626I	nsp3
nsp3	ADRP, Papain-like proteinase, transmembrane domain 1	T626N	nsp3
nsp3	ADRP, Papain-like proteinase, transmembrane domain 1	L627P	nsp3
nsp4	Transmembrane domain 2	K388N	6
nsp4	Transmembrane domain 2	K388R	6
nsp4	Transmembrane domain 2	K388E	7
nsp4	Transmembrane domain 2	H389Q	1
nsp4	Transmembrane domain 2	H389Y	2
nsp4	Transmembrane domain 2	H389N	3
nsp4	Transmembrane domain 2	F390L	3
nsp4	Transmembrane domain 2	F390S	4
nsp4	Transmembrane domain 2	F390C	5
nsp4	Transmembrane domain 2	Y391*	1
nsp4	Transmembrane domain 2	Y391H	1
nsp4	Transmembrane domain 2	Y391S	1
nsp4	Transmembrane domain 2	Y391C	3
nsp4	Transmembrane domain 2	W392C	2
nsp4	Transmembrane domain 2	F393C	1
nsp4	Transmembrane domain 2	F393S	1
nsp4	Transmembrane domain 2	F393Y	1
nsp4	Transmembrane domain 2	F393L	3
nsp4	Transmembrane domain 2	F394C	2
nsp4	Transmembrane domain 2	F394S	2
nsp4	Transmembrane domain 2	S395I	3
nsp4	Transmembrane domain 2	S395N	3
nsp4	Transmembrane domain 2	S395G	58
nsp4	Transmembrane domain 2	N396S	5
nsp4	Transmembrane domain 2	N396T	18
nsp4	Transmembrane domain 2	Y397F	1
nsp4	Transmembrane domain 2	Y397H	17
nsp4	Transmembrane domain 2	Y397C	30
nsp4	Transmembrane domain 2	L398P	2
nsp4	Transmembrane domain 2	L398I	4
nsp4	Transmembrane domain 2	K399M	1
nsp4	Transmembrane domain 2	K399N	1
nsp4	Transmembrane domain 2	K399R	16
nsp4	Transmembrane domain 2	K399E	71
nsp4	Transmembrane domain 2	R400I	1
nsp4	Transmembrane domain 2	R400S	1
nsp4	Transmembrane domain 2	R400K	9
nsp4	Transmembrane domain 2	R401C	2
nsp4	Transmembrane domain 2	R401L	2
nsp4	Transmembrane domain 2	R401H	8
nsp4	Transmembrane domain 2	V402I	3
nsp4	Transmembrane domain 2	V402L	4
nsp6	Putative transmembrane domain	W97*	1
nsp6	Putative transmembrane domain	W97L	1
nsp6	Putative transmembrane domain	W97R	1
nsp6	Putative transmembrane domain	W97C	2
nsp6	Putative transmembrane domain	L98S	1
nsp6	Putative transmembrane domain	L98F	37
nsp6	Putative transmembrane domain	D99Y	2
nsp6	Putative transmembrane domain	D99G	11
nsp6	Putative transmembrane domain	D99N	14
nsp6	Putative transmembrane domain	M100L	1
nsp6	Putative transmembrane domain	M100T	1
nsp6	Putative transmembrane domain	M100V	10
nsp6	Putative transmembrane domain	M100I	122
nsp6	Putative transmembrane domain	V101I	2
nsp6	Putative transmembrane domain	V101A	4
nsp6	Putative transmembrane domain	V101F	15
nsp6	Putative transmembrane domain	D102A	1
nsp6	Putative transmembrane domain	D102I	2
nsp6	Putative transmembrane domain	D102Y	2
nsp6	Putative transmembrane domain	D102G	10
nsp6	Putative transmembrane domain	T103A	1
nsp6	Putative transmembrane domain	T103N	1
nsp6	Putative transmembrane domain	T103I	4
nsp6	Putative transmembrane domain	T103P	22
nsp6	Putative transmembrane domain	L105F	4
